# Supplementary material for: Photoredox catalytic phosphine-mediated deoxygenative alkynylation of carboxylic acids with alkynyl sulfones for alkynone synthesis
Source: Royal Society of Chemistry journal article supplement (doi:10.1039/d4qo02109f), 2025-01-01
Supplement: d4qo02109f1.pdf [file d4qo02109f1.pdf]

**Photoredox catalytic phosphine-mediated deoxygenative alkynylation  
of carboxylic acids with alkynyl sulfones for alkynone synthesis**

Wen-Huan Tang, Li-Yuan Wu, Quan-Quan Zhou,<sup>\*a</sup> and Jie-Ping Wan<sup>\*a</sup>

<sup>a</sup> Institute of Flow Chemistry and Engineering, College of Chemistry and Materials, Jiangxi  
Normal University, Nanchang 330022, China

Correspondence to: [wanjieping@jxnu.edu.cn](mailto:wanjieping@jxnu.edu.cn), [quanquan.zhou@jxnu.edu.cn](mailto:quanquan.zhou@jxnu.edu.cn).

## Table of Contents

|                                                                           |            |
|---------------------------------------------------------------------------|------------|
| <b>1. General Experimental Information.....</b>                           | <b>S3</b>  |
| <b>2. General Procedures for the Synthesis of Alkynyl Sulfones.....</b>   | <b>S4</b>  |
| <b>3. Reaction Optimization.....</b>                                      | <b>S4</b>  |
| <b>4. General Procedure for Synthesis of Ynones.....</b>                  | <b>S7</b>  |
| <b>5. Experimental Procedure for the Functionalization of Ynones.....</b> | <b>S8</b>  |
| 5.1 Synthesis of <b>4</b> .....                                           | S8         |
| 5.2 Synthesis of <b>5</b> .....                                           | S8         |
| 5.3 Synthesis of <b>6</b> .....                                           | S8         |
| 5.4 Synthesis of <b>7</b> .....                                           | S9         |
| 5.5 Gram-scale reaction. ....                                             | S9         |
| <b>6. Control Experiments.....</b>                                        | <b>S10</b> |
| 6.1 Synthesis of 3a. ....                                                 | S10        |
| 6.2 Radical-inhibiting experiment with TEMPO. ....                        | S10        |
| 6.3 Radical-inhibiting experiment with DPE. ....                          | S10        |
| <b>7. Characterization Data of Products.....</b>                          | <b>S11</b> |
| <b>8. NMR Spectrum. ....</b>                                              | <b>S22</b> |
| <b>9. Reference.....</b>                                                  | <b>S56</b> |

## 1. General Experimental Information.

Alkynyl sulfones **2** were synthesized following literature process.<sup>[1]</sup> All other chemicals and solvents used in the experiments were obtained from commercial sources and used directly without further purification. The organic solvents were treated following standard procedures before use. The NMR spectra were recorded on a Bruker AV 400 and 600 NMR spectrometer with CDCl<sub>3</sub> as solvent. The chemical shifts were reported as ppm with TMS or solvent residue peaks as standard (1 H NMR: TMS at 0.00 ppm; <sup>13</sup>C NMR: CDCl<sub>3</sub> at 77.0 ppm).

The setup of photochemical reaction is illustrated as in Figure S1. The 24 W blue LEDs (440–450 nm) employed in this work were bought from Wuhan Geao Chemical Technology Co. LTD The distance from the light source to the irradiation vessel is about 0.9 cm. The reaction vessels are 15 mL Schlenk glass tubes. The temperature is controlled by a fan.

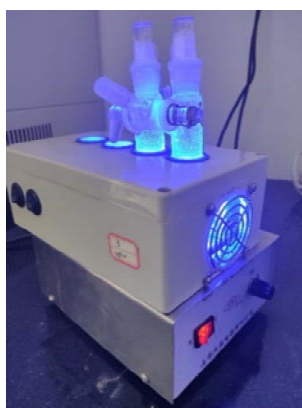

**Figure S1.** Setup of the photochemical reaction.

## 2. General Procedures for the Synthesis of Alkynyl Sulfones.<sup>[1]</sup>

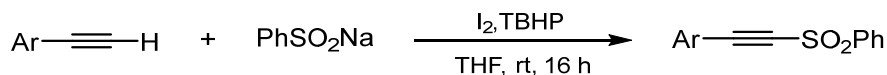

A round bottom flask charged with arylacetylene (5.0 mmol), PhSO<sub>2</sub>Na (10.0 mmol). I<sub>2</sub> (2.5 mmol), and THF (20 mL) was added TBHP (70 wt% in water) dropwise. The resulting mixture was stirred at room temperature for 16 h. The reaction mixture was quenched by saturated Na<sub>2</sub>S<sub>2</sub>O<sub>3</sub> solution, diluted with water (20 mL), and extracted with EtOAc (3x20 mL). The organic layer was washed with brine, dried over anhydrous Na<sub>2</sub>SO<sub>4</sub>, and concentrated to dryness in vacuo. The residue was purified by column chromatography (eluting with PE / EtOAc = 50 / 1 to 30 / 1) to afford the corresponding product.

## 3. Reaction Optimization.

**Table S1.** Screening of optimal photocatalyst<sup>[a]</sup>

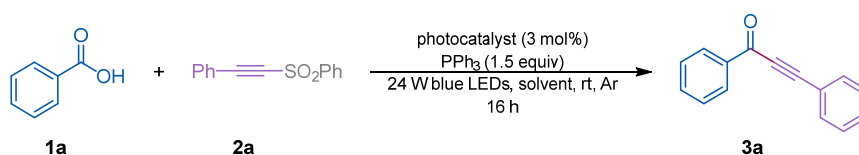

| Entry | Photocatalyst (3 mol%)                                           | Yield <sup>[b]</sup> |
|-------|------------------------------------------------------------------|----------------------|
| 1     | Ir[dF(CF <sub>3</sub> )ppy] <sub>2</sub> (dtbbpy)PF <sub>6</sub> | 51%                  |
| 2     | None                                                             | N.R.                 |
| 3     | 4C <sub>2</sub> IPN                                              | 19%                  |
| 4     | Ir(ppy) <sub>3</sub>                                             | N.R.                 |
| 5     | Ru(bpy) <sub>3</sub> (PF <sub>6</sub> ) <sub>2</sub>             | N.R.                 |
| 6     | 9-Mesityl-10-methylacridin-10-ium Perchlorate                    | N.R.                 |

<sup>[a]</sup>Reaction conditions: 1a (0.3 mmol 1.5 equiv), 2a (0.2 mmol), photocatalyst (0.006 mmol, 3 mol%), PPh<sub>3</sub> (0.3 mmol, 1.5 equiv), DCE (4.0 mL), rt, under Ar, 16 h. <sup>[b]</sup>Isolated yield. N.R. = No reaction occurred.

**Table S2.** Screening of optimal phosphine<sup>[a]</sup>

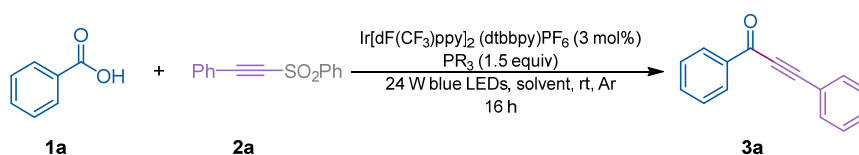

| Entry | phosphine | Yield <sup>[b]</sup> |
|-------|-----------|----------------------|
|-------|-----------|----------------------|

|   |                                      |      |
|---|--------------------------------------|------|
| 1 | PPh <sub>3</sub>                     | 51%  |
| 2 | None                                 | N.R. |
| 3 | ( <i>p</i> F-Ph) <sub>3</sub> P      | 38%  |
| 4 | (Ph) <sub>2</sub> POEt               | N.R. |
| 5 | ( <i>p</i> -OMe-Ph) <sub>2</sub> PPh | 44%  |

<sup>[a]</sup>Reaction conditions: 1a (0.3 mmol 1.5 equiv), 2a (0.2 mmol), Ir[dF(CF<sub>3</sub>)ppy]<sub>2</sub> (dtbbpy)PF<sub>6</sub> (0.006 mmol, 3 mol%), PR<sub>3</sub> (0.3 mmol, 1.5 equiv), DCE (4.0 mL), rt, under Ar, 16 h. <sup>[b]</sup>Isolated yield. N.R. = No reaction occurred.

**Table S3.** Screening of optimal solvent<sup>[a]</sup>

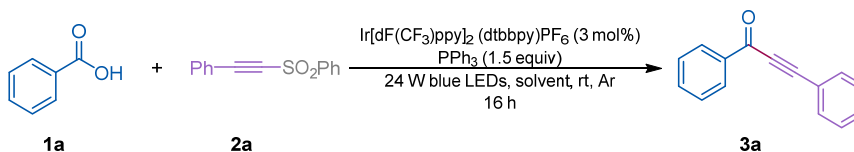

| Entry | Solvent           | Yield <sup>[b]</sup> |
|-------|-------------------|----------------------|
| 1     | DCE               | 51%                  |
| 2     | THF               | Trace                |
| 3     | DCM               | 55%                  |
| 4     | Acetone           | 35 %                 |
| 5     | CHCl <sub>3</sub> | 37%.                 |
| 6     | 1,4-dioxane       | Trace                |

<sup>[a]</sup>Reaction conditions: 1a (0.3 mmol 1.5 equiv), 2a (0.2 mmol), Ir[dF(CF<sub>3</sub>)ppy]<sub>2</sub> (dtbbpy)PF<sub>6</sub> (0.006 mmol, 3 mol%), PPh<sub>3</sub> (0.3 mmol, 1.5 equiv), solvent (4.0 mL), rt, under Ar, 16 h. <sup>[b]</sup>Isolated yield. N.R. = No reaction occurred.

**Table S4.** Screening of optimal amount of 2a<sup>[a]</sup>

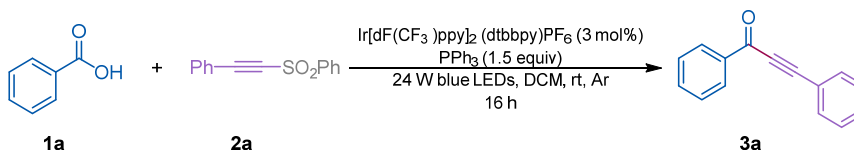

| Entry | 2a (x molar) | Yield <sup>[b]</sup> |
|-------|--------------|----------------------|
| 1     | 0.1 mmol     | 52%                  |
| 2     | 0.15 mmol    | 62%                  |
| 3     | 0.2 mmol     | 55%                  |
| 4     | 0.25 mmol    | 50 %                 |

<sup>[a]</sup>Reaction conditions: 1a (0.3 mmol), 2a (x mmol 1.0 equiv), Ir[dF(CF<sub>3</sub>)ppy]<sub>2</sub> (dtbbpy)PF<sub>6</sub> (3 mol%), PPh<sub>3</sub> (0.3 mmol), DCM (4.0 mL), rt, under Ar, 16 h. <sup>[b]</sup>Isolated yield. N.R. = No reaction

occurred.

**Table S5.** Screening of optimal amount of **1a**<sup>[a]</sup>

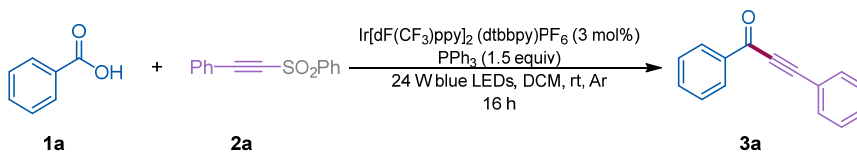

| Entry | <b>1a</b> (x equiv relative of <b>2a</b> ) | Yield <sup>[b]</sup> |
|-------|--------------------------------------------|----------------------|
| 1     | 1.6                                        | 61%                  |
| 2     | 1.8                                        | 74%                  |
| 3     | 2.0                                        | 62%                  |
| 4     | 2.2                                        | 53%                  |

<sup>[a]</sup>Reaction conditions: **1a** (x equiv), **2a** (0.15 mmol 1.0 equiv), Ir[dF(CF<sub>3</sub>)ppy]<sub>2</sub> (dtbbpy)PF<sub>6</sub> (0.0045 mmol 3 mol%), PPh<sub>3</sub> (0.3 mmol 2.0 equiv), DCM (4.0 mL), rt, under Ar, 16 h. <sup>[b]</sup>Isolated yield. N.R. = No reaction occurred.

**Table S6.** Screening of optimal amount of PPh<sub>3</sub><sup>[a]</sup>

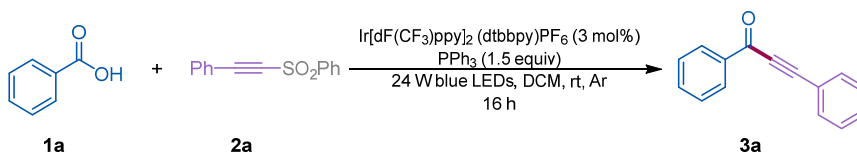

| Entry | PPh <sub>3</sub> (x equiv relative of <b>2a</b> ) | Yield <sup>[b]</sup> |
|-------|---------------------------------------------------|----------------------|
| 1     | 1.6                                               | 55%                  |
| 2     | 1.8                                               | 61%                  |
| 3     | 2.0                                               | 74%                  |
| 4     | 2.2                                               | 63 %                 |

<sup>[a]</sup>Reaction conditions: **1a** (0.27 mmol 1.8 equiv), **2a** (0.15 mmol 1.0 equiv), Ir[dF(CF<sub>3</sub>)ppy]<sub>2</sub> (dtbbpy)PF<sub>6</sub> (0.0045 mmol 3 mol%), PPh<sub>3</sub> (x equiv), DCM (4.0 mL), rt, under Ar, 16 h. <sup>[b]</sup>Isolated yield. N.R. = No reaction occurred.

**Table S7.** Screening of optimal volume of DCM<sup>[a]</sup>

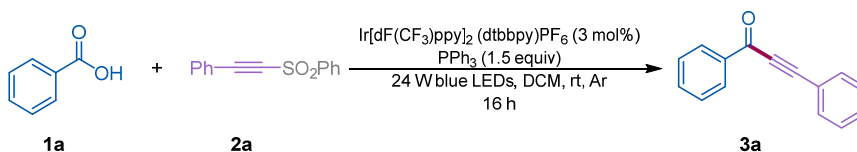

| Entry | DCM (x mL) | Yield <sup>[b]</sup> |
|-------|------------|----------------------|
|-------|------------|----------------------|

|   |   |     |
|---|---|-----|
| 1 | 2 | 57% |
| 2 | 3 | 62% |
| 3 | 4 | 74% |
| 4 | 5 | 60% |

<sup>[a]</sup>Reaction conditions: 1a (0.27 mmol 1.8 equiv), 2a (0.15 mmol 1.0 equiv), Ir[dF(CF<sub>3</sub>)ppy]<sub>2</sub>(dtbbpy)PF<sub>6</sub> (0.0045 mmol 3 mol%), PPh<sub>3</sub> (0.3 mmol 2.0 equiv), DCM (x mL), rt, under Ar, 16 h.

<sup>[b]</sup>Isolated yield. N.R. = No reaction occurred.

**Table S8.** Screening of optimal loading of [Ir]<sup>[a]</sup>

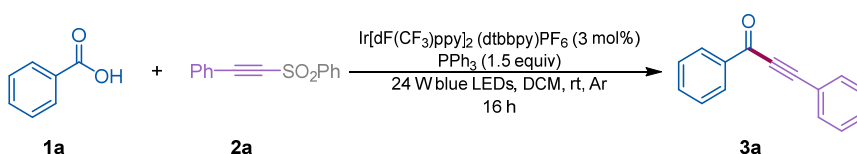

| Entry | [Ir] (x mol%) | Yield <sup>[b]</sup> |
|-------|---------------|----------------------|
| 1     | 1             | 56%                  |
| 2     | 3             | 74%                  |
| 3     | 5             | 75%                  |

<sup>[a]</sup>Reaction conditions: 1a (0.27 mmol 1.8 equiv), 2a (0.15 mmol 1.0 equiv), Ir[dF(CF<sub>3</sub>)ppy]<sub>2</sub>(dtbbpy)PF<sub>6</sub> (x mol%), PPh<sub>3</sub> (0.3 mmol 2.0 equiv), DCM (4 mL), rt, under Ar, 16 h. <sup>[b]</sup>Isolated yield.

N.R. = No reaction occurred.

#### 4. General Procedure for Synthesis of Ynones.

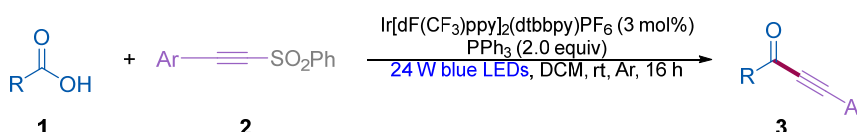

Under an argon atmosphere, (phenylethynyl)sulfones (0.15 mmol, 1.0 equiv), carboxylic acid (0.27 mmol, 1.8 equiv), Ir[dF(CF<sub>3</sub>)ppy]<sub>2</sub>(dtbbpy)PF<sub>6</sub> (5.0 mg, 0.0045 mmol, 3 mol%), triphenylphosphine (78.6 mg, 0.3 mmol, 2.0 equiv), and anhydrous DCM (4 mL) were sequentially added to a 15 mL Schlenk flask. After stirring under irradiation of blue LEDs (440-450 nm) at room temperature for 16 h. After the completion of reaction (monitored by TLC), The organic phase was concentrated under vacuum. the reaction mixture was purified by column chromatography (eluting with PE / EtOAc = 50 / 1 to 30 / 1 ) to afford the desired product.

## 5. Experimental Procedure for the Functionalization of Ynones.

### 5.1 Synthesis of 4.

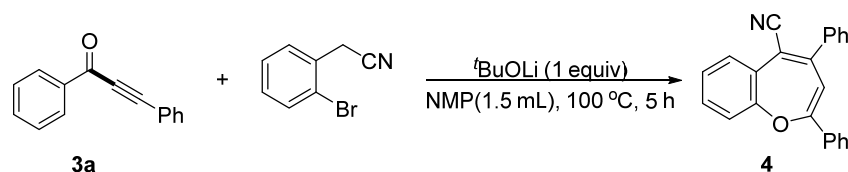

An oven dried 25 mL Schlenk tube was charged with 2-bromobenzyl cyanide (0.3 mmol, 1.0 equiv), 1,3-diphenylprop-2-yn-1-one **3a** (0.3 mmol, 1.0 equiv),  $t\text{BuOLi}$  (0.3 mmol, 1.0 equiv), and NMP (1.5 mL), then the tube was sealed and the reaction mixture was stirred at 100 °C for 5 h. Then the mixture was cooled to room temperature, added by water (5 mL), extracted with EtOAc (3 mL $\times$ 3). The combined organic phases were dried over anhydrous  $\text{Na}_2\text{SO}_4$ , filtered and concentrated under vacuum. Further purification by flash column chromatography on silica gel (eluting with PE / EtOAc = 50 / 1) provided the product **4** in 85% yield.<sup>[2]</sup>

### 5.2 Synthesis of 5.

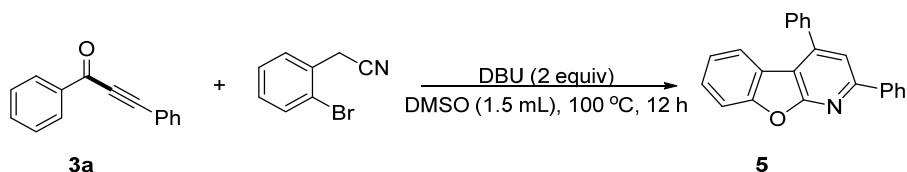

An oven dried 25 mL Schlenk tube was charged with 2-bromobenzyl cyanide (0.3 mmol, 1.0 equiv), 1,3-diphenylprop-2-yn-1-one **3a** (0.45 mmol, 1.5 equiv), DBU (0.6 mmol, 2.0 equiv), and DMSO (1.5 mL), then the tube was sealed and the reaction mixture was stirred at 100 °C for 12 h. Then the mixture was cooled to room temperature, added by water (5 mL), extracted with EtOAc (3 mL $\times$ 3). The combined organic phases were dried over anhydrous  $\text{Na}_2\text{SO}_4$ , filtered and concentrated under vacuum. Further purification by flash column chromatography on silica gel (eluting with PE / EtOAc = 100 / 1) provided the product **5** in 71% yield.<sup>[2]</sup>

### 5.3 Synthesis of 6.

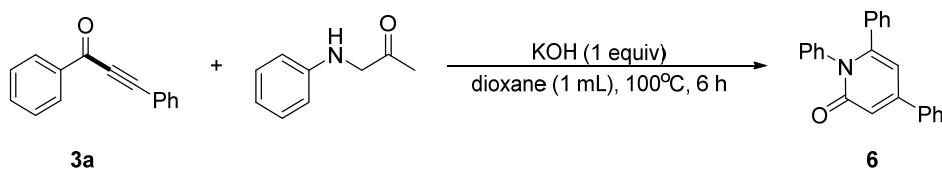

An oven dried 25 mL Schlenk tube was charged with N-phenylacetamide (0.5 mmol, 1.0 equiv), 1,3-diphenylprop-2-yn-1-one **3a** (0.6 mmol, 1.2 equiv), KOH (0.25 mmol, 1.0 equiv) and 1,4-



dioxane (1.5 mL), then the tube was sealed and the reaction mixture was stirred at 100 °C for 6 h. Then the mixture was cooled to room temperature, added by water (5 mL), extracted with EtOAc (5 mL×3). The combined organic phases were dried over anhydrous Na<sub>2</sub>SO<sub>4</sub>, filtered and concentrated under vacuum. Further purification by flash column chromatography on silica gel (eluting with PE / EtOAc = 10 / 1, 100 mL (petroleum ether and ethyl mixture)+1 mL (Et<sub>3</sub>N)) provided the product **6** in 82% yield. [3]

#### 5.4 Synthesis of **7**.

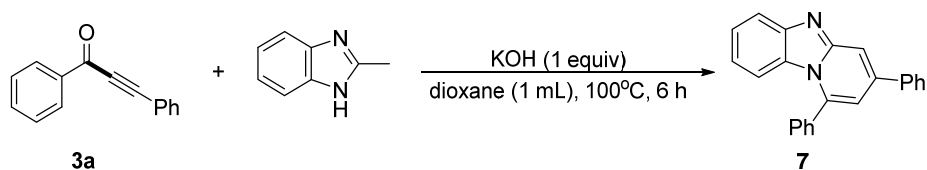

An oven dried 25 mL Schlenk tube was charged with 2-methylbenzimidazole (0.5 mmol, 1.0 equiv), 1,3-diphenylprop-2-yn-1-one **3a** (0.6 mmol, 1.2 equiv), KOH (0.5 mmol, 1.0 equiv) and 1,4-dioxane (1.5 mL), then the tube was sealed and the reaction mixture was stirred at 100 °C for 6 h. Then the mixture was cooled to room temperature, added by water (5 mL), extracted with EtOAc (5 mL×3). The combined organic phases were dried over anhydrous Na<sub>2</sub>SO<sub>4</sub>, filtered and concentrated under vacuum. Further purification by flash column chromatography on silica gel (eluting with PE / EtOAc = 5 / 1, 100 mL (petroleum ether and ethyl mixture)+1 mL (Et<sub>3</sub>N)) provided the product **7** in 72% yield. [3]

#### 5.5 Gram-scale reaction.

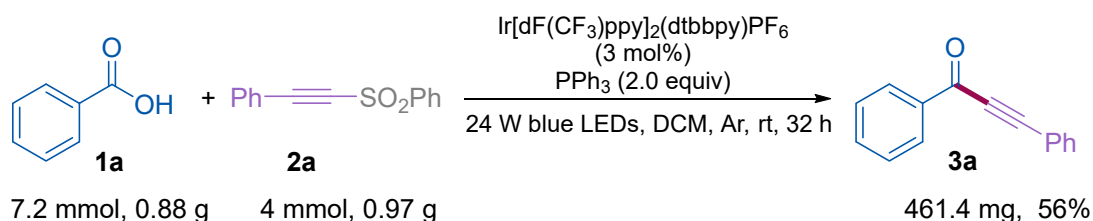

Under an argon atmosphere, (phenylethynyl)sulfones (0.97 g, 4 mmol, 1.0 equiv), benzoic acid (0.88 g 7.2 mmol, 1.8 equiv), Ir[dF(CF<sub>3</sub>)ppy]<sub>2</sub>(dtbbpy)PF<sub>6</sub> (134.6 mg, 0.12 mmol, 3 mol%), triphenylphosphine (2.1 g, 8 mmol, 2.0 equiv), and anhydrous DCM (60 mL) were sequentially added to a 100 mL round-bottom flask and seal it. After stirring under irradiation of blue LEDs (440-450 nm) at room temperature for 32 h. After the completion of reaction (monitored by TLC), The organic phase was concentrated under vacuum. the reaction mixture was purified by column chromatography (eluting with PE / EtOAc = 50 / 1) to afford the desired product **3a** (461.4 mg, 56%).

## 6. Control Experiments.

### 6.1 Synthesis of 3a.

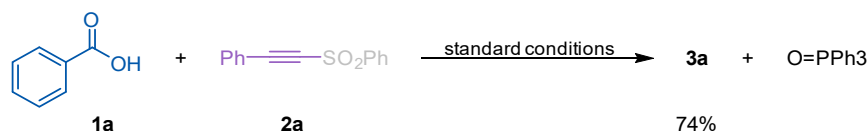

Under an argon atmosphere, (phenylethynyl)sulfones (0.15 mmol, 1.0 equiv), carboxylic acid (0.27 mmol, 1.8 equiv),  $\text{Ir}[\text{dF}(\text{CF}_3)\text{ppy}]_2(\text{dtbbpy})\text{PF}_6$  (5.0 mg, 0.0045 mmol, 3 mol%), triphenylphosphine (78.6 mg, 0.3 mmol, 2.0 equiv), and anhydrous DCM (4 mL) were sequentially added to a 10 mL Schlenk flask. After stirring under irradiation of blue LEDs (440–450 nm) at room temperature for 16 h. After the completion of reaction (monitored by TLC), the reaction solution was concentrated under reduced pressure and the residue was analyzed by TLC and GC-MS,  $\text{O=PPh}_3$  was observed. (**Figure S2**)

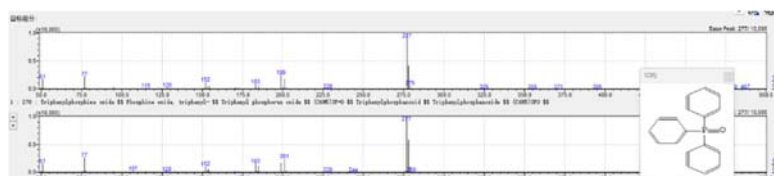

Figure S2.  $\text{O=PPh}_3$  was detected by GC-MS.

### 6.2 Radical-inhibiting experiment with TEMPO.

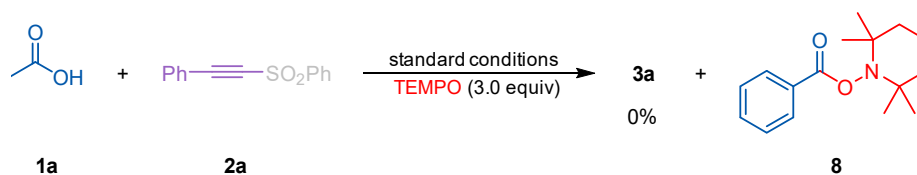

Under an argon atmosphere, (phenylethynyl)sulfones (0.15 mmol, 1.0 equiv), benzoic acid (0.27 mmol, 1.8 equiv),  $\text{Ir}[\text{dF}(\text{CF}_3)\text{ppy}]_2(\text{dtbbpy})\text{PF}_6$  (5.0 mg, 0.0045 mmol, 3 mol%), triphenylphosphine (78.6 mg, 0.3 mmol, 2.0 equiv), TEMPO (70.3 mg, 3.0 equiv) and anhydrous DCM (4 mL) were sequentially added to a 15 mL Schlenk flask. After stirring under irradiation of blue LEDs (440–450 nm) at room temperature for 5 h. After the completion of reaction (monitored by TLC), the reaction solution was concentrated under reduced pressure and the residue was analyzed by TLC and GC-MS, product **8** was observed.

### 6.3 Radical-inhibiting experiment with DPE.

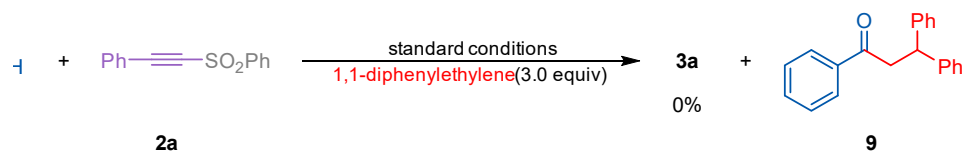

Under an argon atmosphere, (phenylethynyl)sulfones (0.15 mmol, 1.0 equiv), benzoic acid (0.27 mmol, 1.8 equiv), Ir[dF(CF<sub>3</sub>)ppy]<sub>2</sub>(dtbbpy)PF<sub>6</sub> (5.0 mg, 0.0045 mmol, 3 mol%), triphenylphosphine (78.6 mg, 0.3 mmol, 2.0 equiv), DPE (81.0 mg, 3.0 equiv) and anhydrous DCM (4 mL) were sequentially added to a 15 mL Schlenk flask. After stirring under irradiation of blue LEDs (440-450 nm) at room temperature for 5 h. After the completion of reaction (monitored by TLC), the reaction solution was concentrated under reduced pressure and the residue was analyzed by TLC and GC-MS, product **9** was observed. (**Figure S3**)

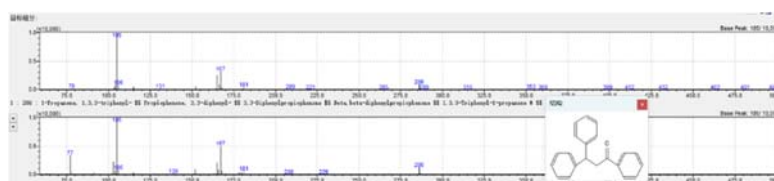

**Figure S3.** The acyl radical trapping product **9** was detected by GC-MS.

## 7. Characterization Data of Products.

### 1,3-diphenylprop-2-yn-1-one **3a**<sup>[4]</sup>

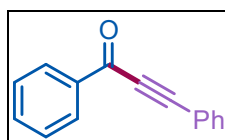

According to the general procedure, the product **3a** was obtained by a flash column chromatography on silica gel (eluent: PE / EtOAc = 50 / 1) in 74% yield (22.9 mg) as a yellow oil.

**<sup>1</sup>H NMR** (600 MHz, CDCl<sub>3</sub>) δ 8.25 – 8.19 (m, 2H), 7.70 – 7.64 (m, 2H), 7.61 (t, *J* = 7.4 Hz, 1H), 7.50 (t, *J* = 7.7 Hz, 2H), 7.46 (t, *J* = 7.5 Hz, 1H), 7.40 (t, *J* = 7.5 Hz, 2H).

**<sup>13</sup>C NMR** (100 MHz, CDCl<sub>3</sub>) δ 178.0, 136.9, 134.1, 133.0, 130.8, 129.5, 128.7, 128.6, 120.1, 93.1, 86.9.

### 3-phenyl-1-(p-tolyl)prop-2-yn-1-one **3b**<sup>[5]</sup>

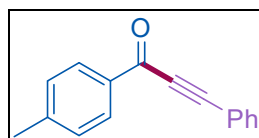

According to the general procedure, the product **3b** was obtained by a flash column chromatography on silica gel (eluent: PE / EtOAc = 50 / 1) in 64% yield (21.1 mg) as a yellow oil.

**<sup>1</sup>H NMR** (400 MHz, CDCl<sub>3</sub>) δ 8.11 (d, *J* = 8.0 Hz, 2H), 7.66 (d, *J* = 6.8 Hz, 2H), 7.49 – 7.43 (m, 1H), 7.40 (t, *J* = 7.2 Hz, 2H), 7.29 (d, *J* = 7.8 Hz, 2H), 2.43 (s, 3H).

**<sup>13</sup>C NMR** (100 MHz, CDCl<sub>3</sub>) δ 177.7, 145.2, 134.6, 133.0, 130.6, 129.7, 129.3, 128.6, 120.2, 92.6, 87.0, 21.8.

**1-(4-isopropylphenyl)-3-phenylprop-2-yn-1-one **3c****<sup>[6]</sup>

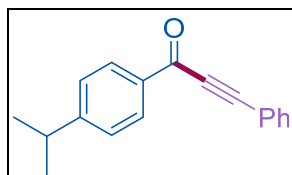

According to the general procedure, the product **3c** was obtained by a flash column chromatography on silica gel (eluent: PE / EtOAc = 50 / 1) in 74% yield (27.5 mg) as a white oil.

**<sup>1</sup>H NMR** (400 MHz, CDCl<sub>3</sub>) δ 8.16 (d, *J* = 7.9 Hz, 2H), 7.68 (d, *J* = 7.4 Hz, 2H), 7.49 – 7.34 (m, *J* = 21.2, 15.4, 7.6 Hz, 5H), 3.07 – 2.92 (m, *J* = 6.9 Hz, 1H), 1.30 (d, *J* = 6.9 Hz, 6H).

**<sup>13</sup>C NMR** (150 MHz, CDCl<sub>3</sub>) δ 177.7, 155.9, 135.0, 133.0, 130.6, 129.8, 128.6, 126.7, 120.3, 92.6, 87.0, 34.4, 23.6.

**1-(4-butylphenyl)-3-phenylprop-2-yn-1-one **3d****<sup>[7]</sup>

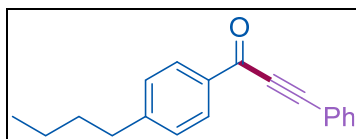

According to the general procedure, the product **3d** was obtained by a flash column chromatography on silica gel (eluent: PE / EtOAc = 50 / 1) in 68% yield (26.7 mg) as a white oil.

**<sup>1</sup>H NMR** (400 MHz, CDCl<sub>3</sub>) δ 8.13 (d, *J* = 8.1 Hz, 2H), 7.67 (d, *J* = 6.9 Hz, 2H), 7.49 – 7.44 (m, 1H), 7.41 (t, *J* = 7.2 Hz, 2H), 7.31 (d, *J* = 8.0 Hz, 2H), 2.69 (t, *J* = 7.6 Hz, 2H), 1.67 – 1.60 (m, 2H), 1.37 (m, *J* = 14.7, 7.2 Hz, 2H), 0.94 (t, *J* = 7.3 Hz, 3H).

**<sup>13</sup>C NMR** (150 MHz, CDCl<sub>3</sub>) δ 177.7, 150.1, 134.8, 133.0, 130.6, 129.7, 128.7, 128.6, 120.3, 92.6, 87.0, 35.8, 33.1, 22.3, 13.8.

**1-(4-(tert-butyl)phenyl)-3-phenylprop-2-yn-1-one **3e****<sup>[8]</sup>

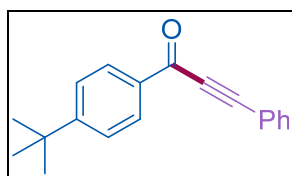

According to the general procedure, the product **3e** was obtained by a flash column chromatography on silica gel (eluent: PE / EtOAc = 50 / 1) in 65% yield (25.5 mg) as a white oil.

**<sup>1</sup>H NMR** (400 MHz, CDCl<sub>3</sub>) δ 8.16 (d, *J* = 8.4 Hz), 7.67 (d, *J* = 6.8 Hz), 7.53 (d, *J* = 8.4 Hz), 7.46 (d, *J* = 7.3 Hz), 7.41 (t, *J* = 7.2 Hz), 1.36 (s, 9H).

**<sup>13</sup>C NMR** (150 MHz, CDCl<sub>3</sub>) δ 177.7, 158.1, 134.5, 133.0, 130.7, 129.6, 128.7, 125.6, 120.3, 92.6, 87.0, 35.3, 31.0.

**1-([1,1'-biphenyl]-4-yl)-3-phenylprop-2-yn-1-one 3f<sup>[7]</sup>**

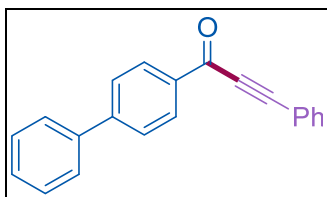

According to the general procedure, the product **3f** was obtained by a flash column chromatography on silica gel (eluent: PE / EtOAc= 50 / 1) in 67% yield (28.3 mg) as a white solid.

**<sup>1</sup>H NMR** (600 MHz, CDCl<sub>3</sub>) δ 8.30 (d, *J* = 8.3 Hz, 2H), 7.76 – 7.73 (m, 2H), 7.73 – 7.70 (m, 2H), 7.67 – 7.64 (m, 2H), 7.52 – 7.47 (m, 3H), 7.46 – 7.41 (m, 3H).

**<sup>13</sup>C NMR** (150 MHz, CDCl<sub>3</sub>) δ 177.6, 146.8, 139.8, 135.8, 133.1, 130.8, 130.2, 129.0, 128.7, 128.4, 127.34, 127.28, 120.2, 93.1, 87.0.

**1-(4-methoxyphenyl)-3-phenylprop-2-yn-1-one 3g<sup>[5]</sup>**

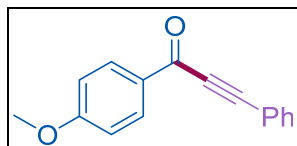

According to the general procedure, the product **3g** was obtained by a flash column chromatography on silica gel (eluent: PE / EtOAc= 50 / 1) in 49% yield (17.3 mg) as a white oil.

**<sup>1</sup>H NMR** (400 MHz, CDCl<sub>3</sub>) δ 8.20 (d, *J* = 8.8 Hz, 2H), 7.68 (d, *J* = 6.8 Hz, 2H), 7.53 – 7.38 (m, 3H), 6.99 (d, *J* = 8.8 Hz, 2H), 3.90 (s, 3H).

**<sup>13</sup>C NMR** (100 MHz, CDCl<sub>3</sub>) δ 176.7, 164.5, 133.0, 132.0, 130.5, 130.4, 128.6, 120.4, 113.9, 92.3, 87.0, 55.6.

**3-phenyl-1-(4-(trifluoromethoxy)phenyl)prop-2-yn-1-one 3h<sup>[9]</sup>**

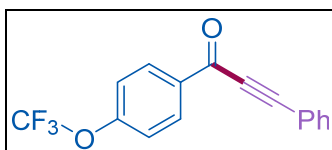

According to the general procedure, the product **3h** was obtained by a flash column chromatography on silica gel (eluent: PE / EtOAc= 50 / 1) in 52% yield (22.6 mg) as a yellow solid.

**<sup>1</sup>H NMR** (600 MHz, CDCl<sub>3</sub>) δ 8.29 – 8.22 (m, 2H), 7.69 – 7.64 (m, 2H), 7.51 – 7.46 (m, 1H), 7.41 (t, *J* = 7.6 Hz, 2H), 7.33 (d, *J* = 8.1 Hz, 2H).

**<sup>13</sup>C NMR** (150 MHz, CDCl<sub>3</sub>) δ 176.2, 153.3, 135.0, 133.0, 131.5, 131.0, 128.7, 120.23, 120.22 (q, *J* = 259.2 Hz), 119.7, 93.7, 86.5.

**<sup>19</sup>F NMR** (565 MHz, CDCl<sub>3</sub>) δ -57.6 .

### 1-(4-fluorophenyl)-3-phenylprop-2-yn-1-one **3i**<sup>[5]</sup>

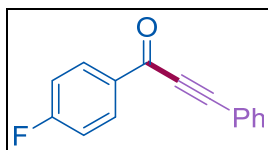

According to the general procedure, the product **3i** was obtained by a flash column chromatography on silica gel (eluent: PE / EtOAc= 50 / 1) in 42% yield (14.1 mg) as a yellow solid.

**<sup>1</sup>H NMR** (600 MHz, CDCl<sub>3</sub>) δ 8.28 – 8.20 (m, 2H), 7.68 (d, *J* = 7.7 Hz, 2H), 7.50 (t, *J* = 7.4 Hz, 1H), 7.43 (t, *J* = 7.6 Hz, 2H), 7.19 (t, *J* = 8.5 Hz, 2H).

**<sup>13</sup>C NMR** (150 MHz, CDCl<sub>3</sub>) δ 176.4, 166.5 (d, *J* = 257.1 Hz), 133.5 (d, *J* = 2.1 Hz), 133.1, 132.3 (d, *J* = 8.9 Hz), 130.9, 128.8, 120.0, 115.9 (d, *J* = 22.7 Hz), 93.4, 86.6.

**<sup>19</sup>F NMR** (376 MHz, CDCl<sub>3</sub>) δ -103.2.

### 1-(4-chlorophenyl)-3-phenylprop-2-yn-1-one **3j**<sup>[5]</sup>

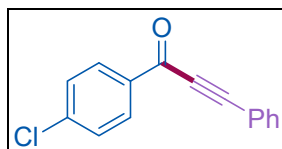

According to the general procedure, the product **3j** was obtained by a flash column chromatography on silica gel (eluent: PE / EtOAc= 50 / 1) in 51% yield (18.4 mg) as a yellow oil.

**<sup>1</sup>H NMR** (600 MHz, CDCl<sub>3</sub>) δ 8.16 (d, *J* = 7.4 Hz, 2H), 7.69 (d, *J* = 7.4 Hz, 2H), 7.50 (d, *J* = 7.5 Hz, 3H), 7.43 (t, *J* = 7.4 Hz, 2H).

**<sup>13</sup>C NMR** (150 MHz, CDCl<sub>3</sub>) δ 176.7, 140.7, 135.1, 133.1, 131.0, 130.9, 129.0, 128.7, 119.9, 93.6, 86.6.

### 1-(4-bromophenyl)-3-phenylprop-2-yn-1-one **3k**<sup>[10]</sup>

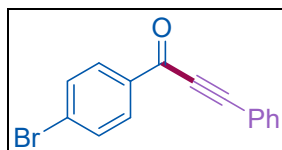

According to the general procedure, the product **3k** was obtained by a flash column chromatography on silica gel (eluent: PE / EtOAc= 50 / 1) in 57% yield (24.4 mg) as a yellow oil.

**<sup>1</sup>H NMR** (600 MHz, CDCl<sub>3</sub>) δ 8.08 (d, *J* = 7.9 Hz, 2H), 7.71 – 7.61 (m, 4H), 7.50 (t, *J* = 7.4 Hz, 1H), 7.43 (t, *J* = 7.6 Hz, 2H).

**<sup>13</sup>C NMR** (150 MHz, CDCl<sub>3</sub>) δ 176.8, 135.7, 133.1, 132.0, 130.98, 130.92, 130.0, 128.7, 119.9, 93.7, 86.6.

### 3-phenyl-1-(4-(trifluoromethyl)phenyl)prop-2-yn-1-one **3l**<sup>[11]</sup>

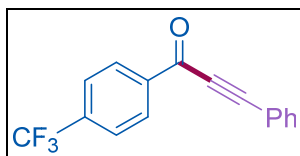

According to the general procedure, the product **3l** was obtained by a flash column chromatography on silica gel (eluent: PE / EtOAc= 50 / 1) in 43% yield (17.7 mg) as a yellow solid.

**<sup>1</sup>H NMR** (400 MHz, CDCl<sub>3</sub>) δ 8.32 (d, *J* = 7.7 Hz, 2H), 7.79 (d, *J* = 7.7 Hz, 2H), 7.70 (d, *J* = 7.0 Hz, 2H), 7.55 – 7.48 (m, 1H), 7.44 (t, *J* = 7.0 Hz, 2H).

**<sup>13</sup>C NMR** (150MHz, CDCl<sub>3</sub>) δ 176.7, 139.4, 135.2 (q, *J* = 32.7 Hz), 133.2, 131.2, 129.8, 128.8, 125.7 (q, *J* = 4.0 Hz), 123.6 (d, *J* = 272.6 Hz), 119.7, 94.5, 86.6.

**<sup>19</sup>F NMR** (565 MHz, CDCl<sub>3</sub>) δ -63.1 .

### 3-phenyl-1-(o-tolyl)prop-2-yn-1-one **3m**<sup>[5]</sup>

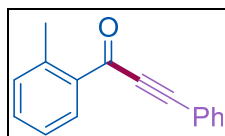

According to the general procedure, the product **3m** was obtained by a flash column chromatography on silica gel (eluent: PE / EtOAc= 50 / 1) in 55% yield (18.2 mg) as a white oil.

**<sup>1</sup>H NMR** (600 MHz, CDCl<sub>3</sub>) δ 8.28 (d, *J* = 7.7 Hz, 1H), 7.58 (d, *J* = 8.4 Hz, 2H), 7.42 – 7.36 (m, 2H), 7.32 (q, *J* = 7.4 Hz, 3H), 7.20 (d, *J* = 7.6 Hz, 1H), 2.65 (s, 3H).

**<sup>13</sup>C NMR** (150 MHz, CDCl<sub>3</sub>) δ 179.2, 140.0, 135.3, 132.9, 132.6, 132.5, 131.9, 130.3, 128.3, 125.6, 119.9, 91.4, 88.1, 21.6.

### 3-phenyl-1-(m-tolyl)prop-2-yn-1-one **3n**<sup>[5]</sup>

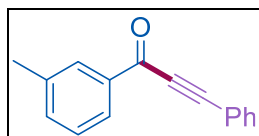

According to the general procedure, the product **3n** was obtained by a flash column chromatography on silica gel (eluent: PE / EtOAc= 50 / 1) in 61% yield (20.1 mg) as a white solid.

**<sup>1</sup>H NMR** (600 MHz, CDCl<sub>3</sub>) δ 8.06 – 7.99 (m, 2H), 7.69 (d, *J* = 7.9 Hz, 2H), 7.48 (t, *J* = 7.3 Hz, 1H), 7.42 (p, *J* = 7.6 Hz, 4H), 2.45 (s, 3H).

**<sup>13</sup>C NMR** (150 MHz, CDCl<sub>3</sub>) δ 178.2, 138.5, 136.9, 135.0, 133.0, 130.7, 129.7, 128.6, 128.5, 127.1, 120.2, 92.8, 87.0, 21.3.

### 1-(naphthalen-2-yl)-3-phenylprop-2-yn-1-one **3o**<sup>[7]</sup>

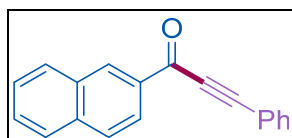

According to the general procedure, the product **3o** was obtained by a flash column chromatography on silica gel (eluent: PE / EtOAc= 50 / 1) in 61% yield (23.4 mg) as a yellow solid.

**<sup>1</sup>H NMR** (600 MHz, CDCl<sub>3</sub>) δ 8.78 (s, 1H), 8.20 (d, *J* = 8.6 Hz, 1H), 8.01 (d, *J* = 8.1 Hz, 1H), 7.94 – 7.86 (m, 2H), 7.73 (d, *J* = 7.7 Hz, 2H), 7.62 (t, *J* = 7.5 Hz, 1H), 7.56 (t, *J* = 7.5 Hz, 1H), 7.49 (t, *J* = 7.3 Hz, 1H), 7.43 (t, *J* = 7.5 Hz, 2H).

**<sup>13</sup>C NMR** (150 MHz, CDCl<sub>3</sub>) δ 177.9, 136.1, 134.4, 133.0, 132.6, 132.4, 130.7, 129.9, 129.0, 128.7, 128.5, 127.9, 126.9, 123.9, 120.2, 93.0, 87.1.

**1-(1-methyl-1H-pyrrol-2-yl)-3-phenylprop-2-yn-1-one 3p<sup>[14]</sup>**

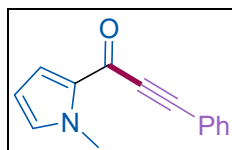

According to the general procedure, the product **3p** was obtained by a flash column chromatography on silica gel (eluent: PE / EtOAc= 20 / 1) in 42% yield (13.2 mg) as a yellow solid.

**<sup>1</sup>H NMR** (600 MHz, CDCl<sub>3</sub>) δ 7.63 (d, *J* = 7.21 Hz, 2H), 7.44 (t, *J* = 7.37 Hz, 1H), 7.39 (t, *J* = 7.46 Hz, 2H), 7.31 – 7.28 (m, 1H), 6.89 (s, 1H), 6.20 (m, *J* = 3.68, 2.45 Hz, 1H), 3.99 (s, 3H).

**<sup>13</sup>C NMR** (150 MHz, CDCl<sub>3</sub>) δ 166.7, 132.6, 132.5, 132.1, 130.1, 128.5, 123.7, 120.6, 109.0, 88.4, 87.5, 37.3.

**1-phenyl-3-(o-tolyl)prop-2-yn-1-one 3q<sup>[4]</sup>**

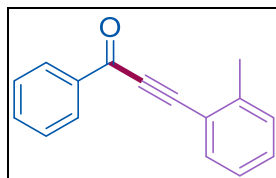

According to the general procedure, the product **3q** was obtained by a flash column chromatography on silica gel (eluent: PE / EtOAc= 50 / 1) in 56% yield (18.5 mg) as a yellow oil.

**<sup>1</sup>H NMR** (400 MHz, CDCl<sub>3</sub>) δ 8.23 (d, *J* = 7.2 Hz, 2H), 7.66 – 7.58 (m, 2H), 7.50 (t, *J* = 7.5 Hz, 2H), 7.35 (t, *J* = 7.3 Hz, 1H), 7.31 – 7.19 (m, 2H), 2.57 (s, 3H).

**<sup>13</sup>C NMR** (150 MHz, CDCl<sub>3</sub>) δ 178.0, 142.1, 137.0, 134.0, 133.6, 130.8, 129.8, 129.5, 128.6, 125.9, 119.9, 92.1, 90.7, 20.8.

**1-phenyl-3-(m-tolyl)prop-2-yn-1-one 3r<sup>[4]</sup>**

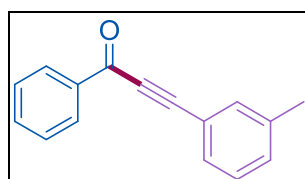

According to the general procedure, the product **3r** was obtained by a flash column chromatography on silica gel (eluent: PE / EtOAc= 50 / 1) in 63% yield (20.8 mg) as a yellow oil.



**<sup>1</sup>H NMR** (400 MHz, CDCl<sub>3</sub>) δ 8.22 (d, *J* = 7.2 Hz, 2H), 7.62 (t, *J* = 7.3 Hz, 1H), 7.56 – 7.46 (m, 4H), 7.30 (d, *J* = 5.4 Hz, 2H), 2.38 (s, 3H).

**<sup>13</sup>C NMR** (150 MHz, CDCl<sub>3</sub>) δ 178.0, 138.5, 137.0, 134.0, 133.5, 131.7, 130.2, 129.6, 128.59, 128.57, 119.9, 93.5, 86.7, 21.1.

**1-phenyl-3-(p-tolyl)prop-2-yn-1-one **3s**<sup>[4]</sup>**

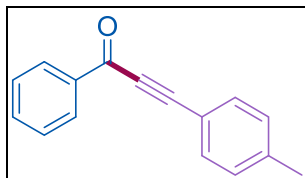

According to the general procedure, the product **3s** was obtained by a flash column chromatography on silica gel (eluent: PE / EtOAc= 50 / 1) in 67% yield (22.1 mg) as a yellow oil.

**<sup>1</sup>H NMR** (600 MHz, CDCl<sub>3</sub>) δ 8.24 – 8.20 (m, 2H), 7.62 – 7.59 (m, 1H), 7.57 (d, *J* = 8.1 Hz, 2H), 7.52 – 7.48 (m, 2H), 7.20 (d, *J* = 7.9 Hz, 2H), 2.38 (s, 3H).

**<sup>13</sup>C NMR** (150 MHz, CDCl<sub>3</sub>) δ 177.9, 141.5, 136.9, 133.9, 133.0, 129.41, 129.39, 128.5, 116.9, 93.7, 86.7, 21.6.

**3-(4-butylphenyl)-1-phenylprop-2-yn-1-one **3t**<sup>[5]</sup>**

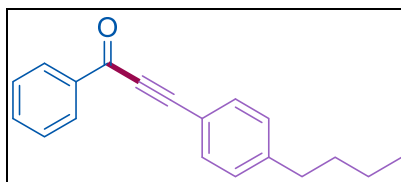

According to the general procedure, the product **3t** was obtained by a flash column chromatography on silica gel (eluent: PE / EtOAc= 50 / 1) in 72% yield (28.3 mg) as a yellow oil.

**<sup>1</sup>H NMR** (400 MHz, CDCl<sub>3</sub>) δ 8.22 (d, *J* = 7.2 Hz, 2H), 7.60 (d, *J* = 8.0 Hz, 3H), 7.51 (t, *J* = 7.5 Hz, 2H), 7.23 (d, *J* = 7.9 Hz, 2H), 2.65 (t, *J* = 7.6 Hz, 2H), 1.65 – 1.57 (m, 2H), 1.41 – 1.31 (m, 2H), 0.93 (t, *J* = 7.3 Hz, 3H).

**<sup>13</sup>C NMR** (150 MHz, CDCl<sub>3</sub>) δ 178.1, 146.5, 137.0, 134.0, 133.1, 129.5, 128.8, 128.6, 117.2, 93.9, 86.8, 35.8, 33.2, 22.3, 13.8.

**3-(4-(tert-butyl)phenyl)-1-phenylprop-2-yn-1-one **3u**<sup>[12]</sup>**

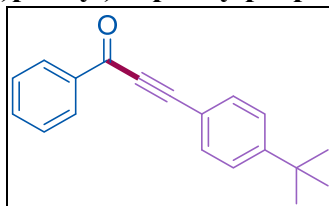

According to the general procedure, the product **3u** was obtained by a flash column chromatography on silica gel (eluent: PE / EtOAc= 50 / 1) in 67% yield (26.3 mg) as a yellow oil.

**<sup>1</sup>H NMR** (400 MHz, CDCl<sub>3</sub>) δ 8.22 (d, *J* = 7.2 Hz, 2H), 7.61 (t, *J* = 8.2 Hz, 3H), 7.50 (t, *J* = 7.5 Hz, 2H), 7.44 (d, *J* = 8.2 Hz, 2H), 1.33 (s, 9H).

**<sup>13</sup>C NMR** (150 MHz, CDCl<sub>3</sub>) δ 178.1, 154.6, 137.0, 134.0, 133.0, 129.5, 128.6, 125.7, 117.0, 93.8, 86.7, 55.1, 31.0.

### 3-(4-methoxyphenyl)-1-phenylprop-2-yn-1-one **3v**<sup>[4]</sup>

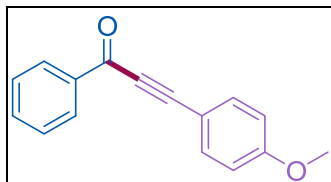

According to the general procedure, the product **3v** was obtained by a flash column chromatography on silica gel (eluent: PE / EtOAc= 50 / 1) in 44% yield (15.6 mg) as a white solid.

**<sup>1</sup>H NMR** (400 MHz, CDCl<sub>3</sub>) δ 8.21 (d, *J* = 7.2 Hz, 2H), 7.62 (t, *J* = 10.6 Hz, 3H), 7.51 (t, *J* = 7.1 Hz, 2H), 6.93 (d, *J* = 7.9 Hz, 2H), 3.85 (s, 3H)..

**<sup>13</sup>C NMR** (150 MHz, CDCl<sub>3</sub>) δ 178.1, 161.8, 137.1, 135.2, 133.9, 129.5, 128.6, 114.5, 111.9, 94.4, 86.9, 55.5.

### 3-(4-ethoxyphenyl)-1-phenylprop-2-yn-1-one **3w**<sup>[13]</sup>

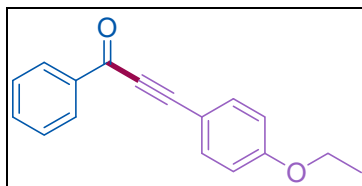

According to the general procedure, the product **3w** was obtained by a flash column chromatography on silica gel (eluent: PE / EtOAc= 50 / 1) in 47% yield (17.6 mg) as a white solid.

**<sup>1</sup>H NMR** (600 MHz, CDCl<sub>3</sub>) δ 8.22 (d, *J* = 7.5 Hz, 2H), 7.65 – 7.59 (m, 3H), 7.51 (t, *J* = 7.7 Hz, 2H), 6.91 (d, *J* = 8.7 Hz, 2H), 4.09 – 4.05 (m, 2H), 1.43 (t, *J* = 7.0 Hz, 3H).

**<sup>13</sup>C NMR** (150 MHz, CDCl<sub>3</sub>) δ 178.0, 161.2, 137.0, 135.1, 133.8, 129.4, 128.5, 114.8, 111.6, 94.5, 86.8, 63.7, 14.6.

### 3-(4-fluorophenyl)-1-phenylprop-2-yn-1-one **3x**<sup>[4]</sup>

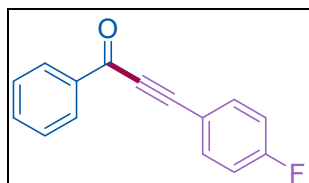

According to the general procedure, the product **3x** was obtained by a flash column chromatography on silica gel (eluent: PE / EtOAc= 50 / 1) in 58% yield (19.5 mg) as a yellow solid.

**<sup>1</sup>H NMR** (600 MHz, CDCl<sub>3</sub>) δ 8.21 (d, *J* = 7.8 Hz, 2H), 7.72 – 7.67 (m, 2H), 7.64 (t, *J* = 7.3 Hz, 1H), 7.52 (t, *J* = 7.6 Hz, 2H), 7.13 (t, *J* = 8.4 Hz, 2H).

**<sup>13</sup>C NMR** (100 MHz, CDCl<sub>3</sub>) δ 177.9, 164.9 (d, *J* = 253.9 Hz), 136.8, 135.4 (d, *J* = 8.8 Hz), 134.2, 129.5, 128.6, 116.3 (d, *J* = 3.7 Hz), 116.3 (d, *J* = 21.9 Hz), 92.0, 86.8.

**<sup>19</sup>F NMR** (565 MHz, CDCl<sub>3</sub>) δ -106.1 .

### 3-(4-chlorophenyl)-1-phenylprop-2-yn-1-one **3y**<sup>[4]</sup>

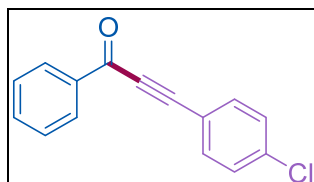

According to the general procedure, the product **3y** was obtained by a flash column chromatography on silica gel (eluent: PE / EtOAc= 50 / 1) in 55% yield (19.8 mg) as a yellow solid.

**<sup>1</sup>H NMR** (600 MHz, CDCl<sub>3</sub>) δ 8.20 (d, *J* = 7.8 Hz, 2H), 7.66 – 7.58 (m, 3H), 7.51 (t, *J* = 7.5 Hz, 2H), 7.39 (d, *J* = 8.0 Hz, 2H).

**<sup>13</sup>C NMR** (150 MHz, CDCl<sub>3</sub>) δ 177.7, 137.1, 136.7, 134.2, 129.5, 129.1, 128.6, 118.5, 91.5, 87.5.

### 3-(4-bromophenyl)-1-phenylprop-2-yn-1-one **3z**<sup>[4]</sup>

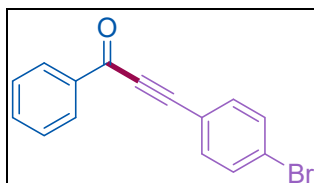

According to the general procedure, the product **3z** was obtained by a flash column chromatography on silica gel (eluent: PE / EtOAc= 50 / 1) in 47% yield (20.1 mg) as a white solid.

**<sup>1</sup>H NMR** (600 MHz, CDCl<sub>3</sub>) δ 8.23 – 8.17 (m, 2H), 7.67 – 7.63 (m, 1H), 7.59 – 7.51 (m, 6H).

**<sup>13</sup>C NMR** (150 MHz, CDCl<sub>3</sub>) δ 177.8, 136.7, 134.3, 134.3, 132.1, 129.6, 128.7, 125.6, 119.1, 91.6, 87.7.

### 1-phenyl-3-(4-(trifluoromethyl)phenyl)prop-2-yn-1-one **3aa**<sup>[4]</sup>

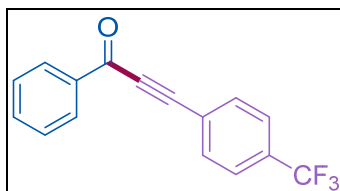

According to the general procedure, the product **3aa** was obtained by a flash column chromatography on silica gel (eluent: PE / EtOAc= 50 / 1) in 41% yield (16.9 mg) as a yellow solid.

**<sup>1</sup>H NMR** (600 MHz, CDCl<sub>3</sub>) δ 8.20 (d, *J* = 7.9 Hz, 2H), 7.76 (d, *J* = 8.2 Hz, 2H), 7.68 – 7.61 (m, 3H), 7.51 (t, *J* = 7.7 Hz, 2H).

**<sup>13</sup>C NMR** (150 MHz, CDCl<sub>3</sub>) δ 177.5, 136.5, 134.5, 133.1, 132.2 (q, *J* = 32.7 Hz), 129.5, 128.6, 125.5 (q, *J* = 3.4 Hz), 124.4, 123.8 (q, *J* = 272.6 Hz), 90.3, 88.0.

**<sup>19</sup>F NMR** (565 MHz, CDCl<sub>3</sub>) δ -63.1.

#### 2,4-diphenylbenzo[b]oxepine-5-carbonitrile **4**<sup>[2]</sup>

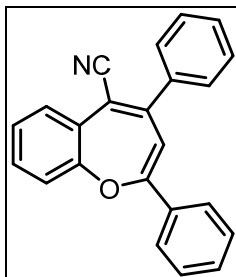

The representative general procedure mentioned above was followed. the product **4** was obtained by a flash column chromatography on silica gel (eluent: PE / EtOAc= 50 / 1) in 85% (0.3 mmol scale, 81.9 mg) as a yellow solid.

**<sup>1</sup>H NMR** (600 MHz, CDCl<sub>3</sub>) δ 7.88 – 7.84 (m, 2H), 7.74 – 7.71 (m, 1H), 7.61 – 7.57 (m, 2H), 7.50 – 7.40 (m, 7H), 7.31 – 7.27 (m, 1H), 7.16 – 7.13 (m, 1H), 6.41 (s, 1H).

**<sup>13</sup>C NMR** (150 MHz, CDCl<sub>3</sub>) δ 159.9, 156.1, 152.9, 139.3, 133.5, 131.7, 130.3, 129.6, 128.8, 128.7, 128.7, 128.4, 126.2, 125.7, 121.4, 118.6, 112.3, 111.0.

#### 2,4-diphenylbenzofuro[2,3-b]pyridine **5**<sup>[2]</sup>

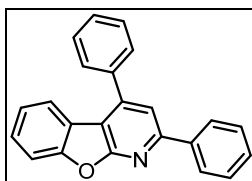

The representative general procedure mentioned above was followed. the product **5** was obtained by a flash column chromatography on silica gel (eluent: PE / EtOAc= 50 / 1) in 71% (0.3 mmol scale, 68.4 mg) as a yellow solid.

**<sup>1</sup>H NMR** (600 MHz, CDCl<sub>3</sub>) δ 8.21 – 8.16 (m, 2H), 7.78 – 7.71 (m, 3H), 7.67 – 7.54 (m, 5H), 7.54 – 7.42 (m, 4H), 7.23 – 7.18 (m, 1H).

**<sup>13</sup>C NMR** (150 MHz, CDCl<sub>3</sub>) δ 163.8, 154.9, 154.7, 147.0, 138.6, 137.9, 129.3, 129.2, 129.0, 128.8, 128.5, 128.0, 127.2, 123.0, 122.5, 122.3, 116.9, 112.9, 112.0.

#### 1,4,6-triphenylpyridin-2(1H)-one **6**<sup>[3]</sup>

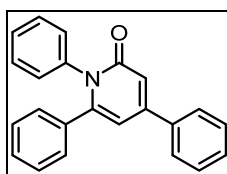

The representative general procedure mentioned above was followed. the product **6** was obtained by a flash column chromatography on silica gel (eluent: PE / EtOAc= 50 / 1) in 82% (0.5 mmol scale, 132.4 mg) as a white solid.

**<sup>1</sup>H NMR** (600 MHz, CDCl<sub>3</sub>) δ 7.69 – 7.65 (m, 2H), 7.52 – 7.41 (m, 3H), 7.30 – 7.24 (m, 2H), 7.23 – 7.10 (m, 8H), 6.93 (t, *J* = 1.8 Hz, 1H), 6.55 (d, *J* = 1.9 Hz, 1H).

**<sup>13</sup>C NMR** (150 MHz, CDCl<sub>3</sub>) δ 163.6, 151.3, 149.4, 138.4, 137.5, 135.7, 129.5, 129.01, 129.00, 128.97, 128.7, 128.4, 128.0, 127.9, 116.2, 107.5.

**1,3-diphenylbenzo[4,5]imidazo[1,2-a]pyridine 7<sup>[3]</sup>**

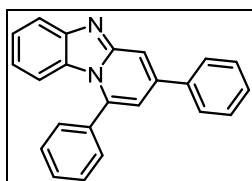

The representative general procedure mentioned above was followed. the product **7** was obtained by a flash column chromatography on silica gel (eluent: PE / EtOAc= 50 / 1) in 72% (0.5 mmol scale, 115.2 mg) as a white solid.

**<sup>1</sup>H NMR** (600 MHz, CDCl<sub>3</sub>) δ 7.93 – 7.89 (m, 2H), 7.74 (d, *J* = 7.6 Hz, 2H), 7.68 – 7.58 (m, 5H), 7.49 (t, *J* = 7.5 Hz, 2H), 7.45 – 7.39 (m, 2H), 6.99 – 6.94 (m, 2H), 6.59 (d, *J* = 8.5 Hz, 1H).

**<sup>13</sup>C NMR** (150 MHz, CDCl<sub>3</sub>) δ 150.1, 145.7, 141.7, 141.1, 138.1, 134.4, 130.1, 129.10, 129.07, 129.0, 128.8, 126.9, 125.1, 120.3, 119.5, 114.5, 113.1, 112.0.

## 8. NMR Spectrum.

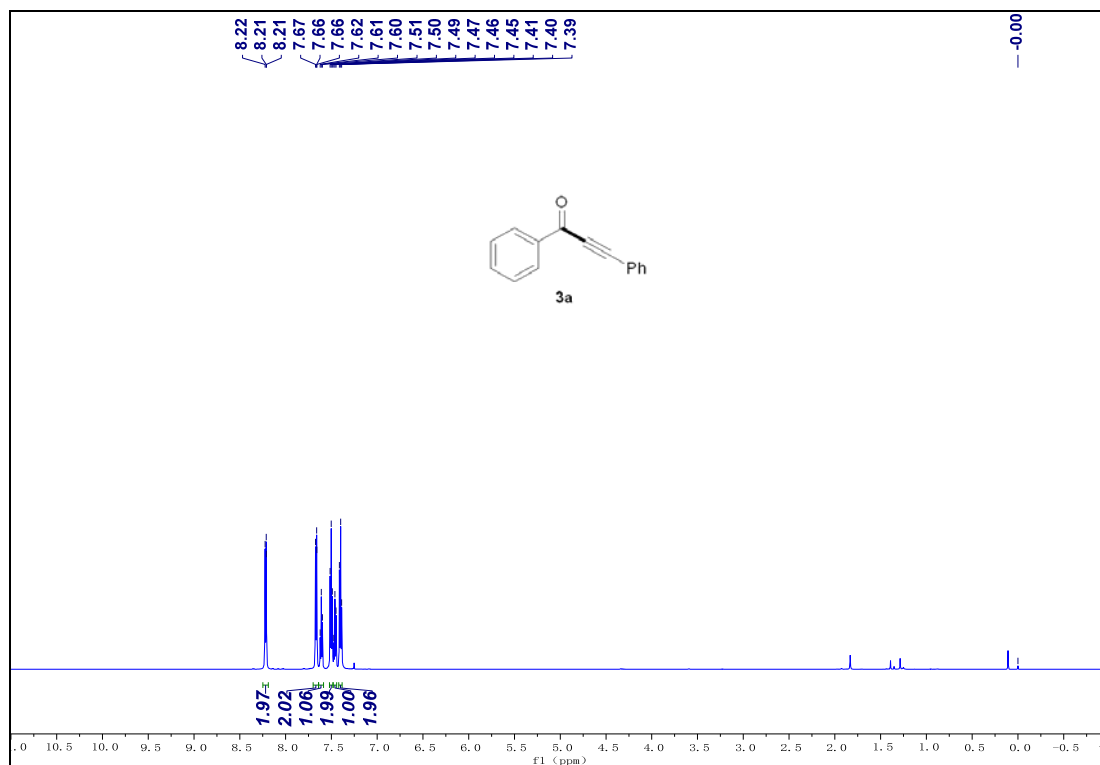

Figure S4. <sup>1</sup>H NMR spectrum of **3a** (600 MHz, CDCl<sub>3</sub>, 298 K).

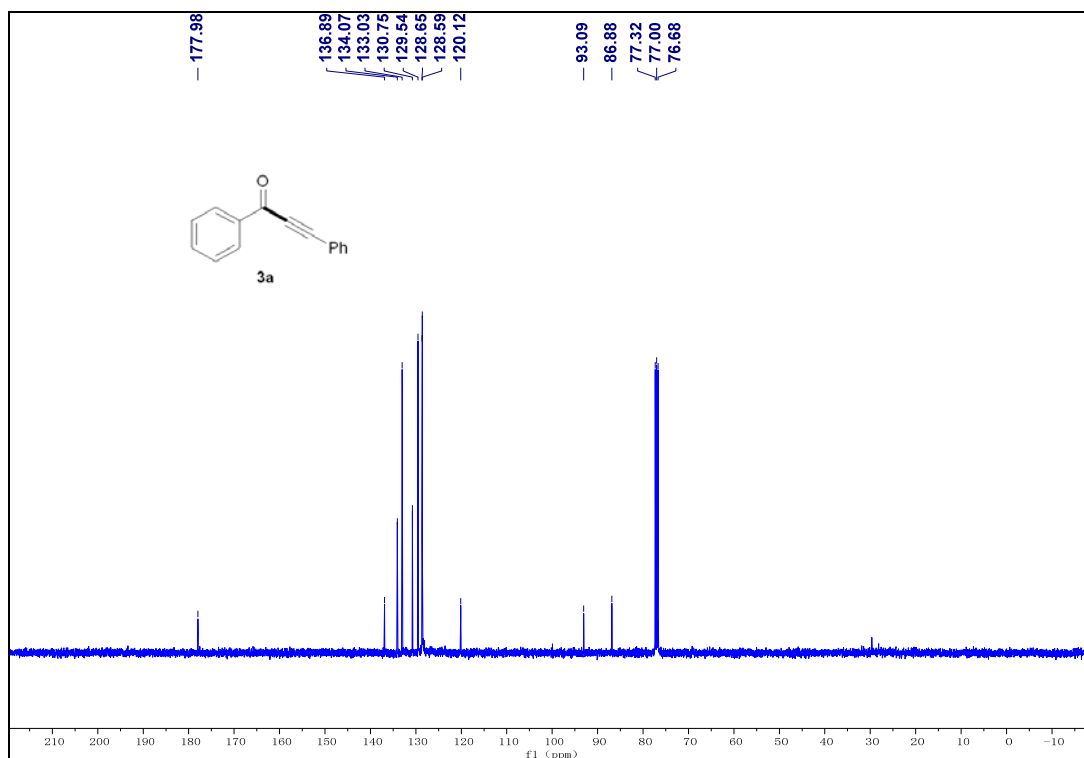

Figure S5. <sup>13</sup>C NMR spectrum of **3a** (100 MHz, CDCl<sub>3</sub>, 298 K).

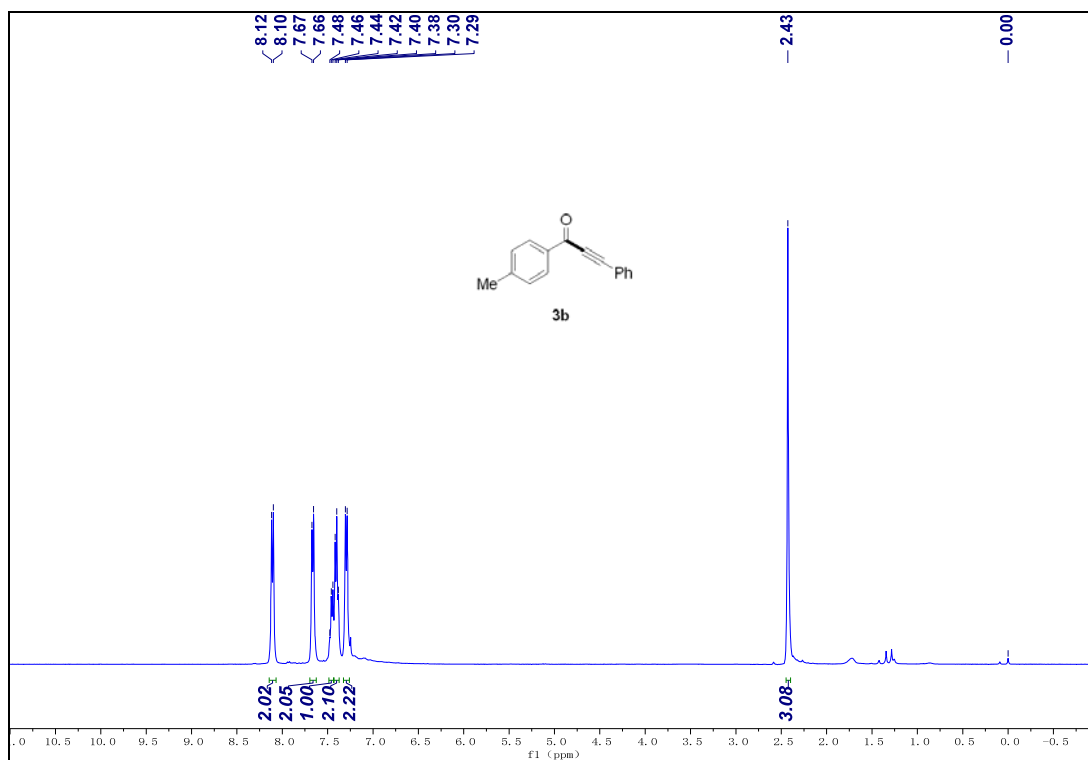

**Figure S6.**  $^1\text{H}$  NMR spectrum of **3b** (400 MHz,  $\text{CDCl}_3$ , 298 K).

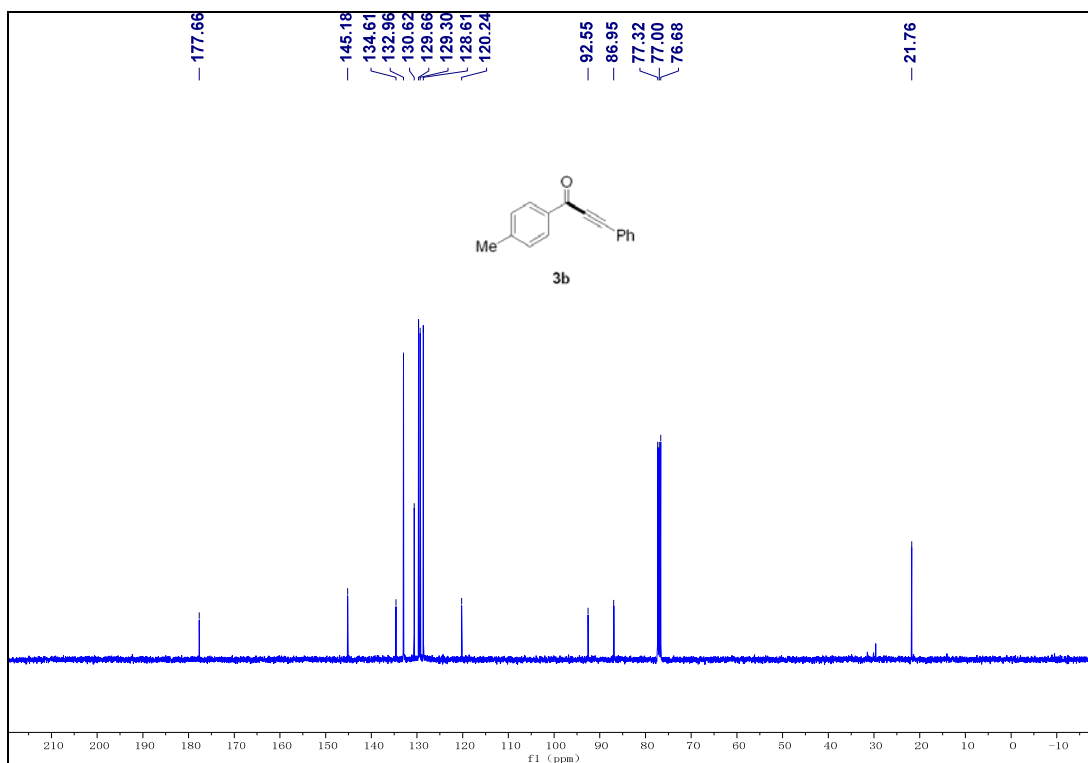

**Figure S7.**  $^{13}\text{C}$  NMR spectrum of **3b** (100 MHz,  $\text{CDCl}_3$ , 298 K).

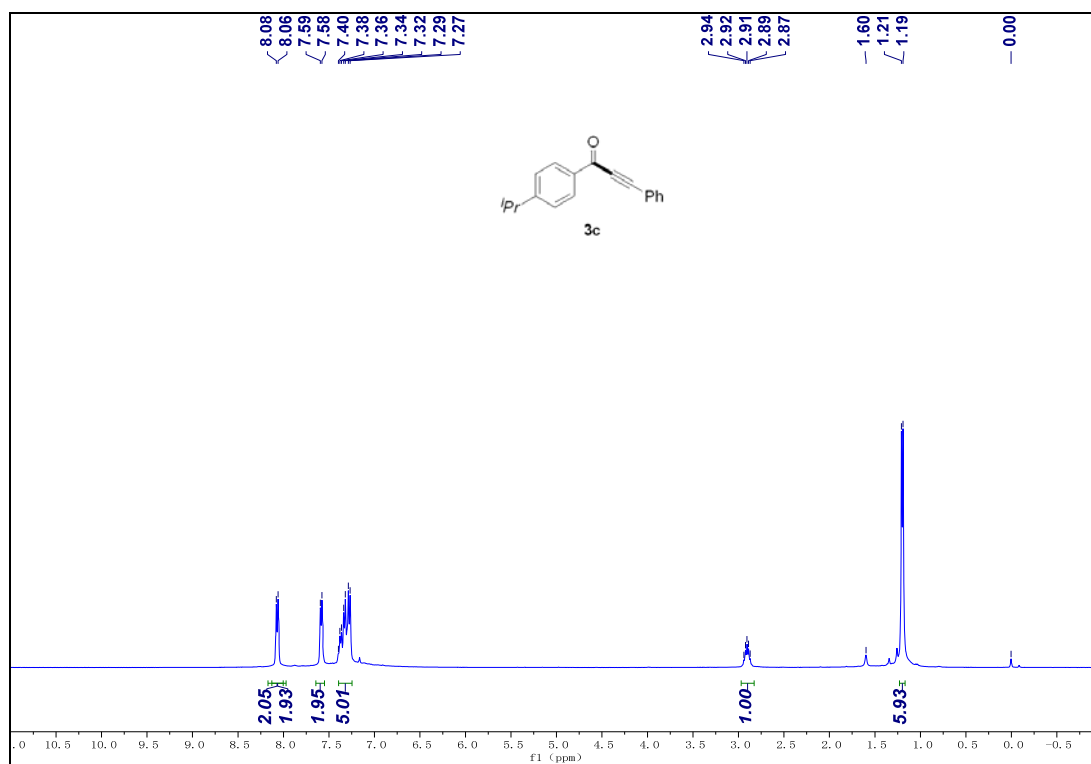

**Figure S8.** <sup>1</sup>H NMR spectrum of **3c** (400 MHz, CDCl<sub>3</sub>, 298 K).

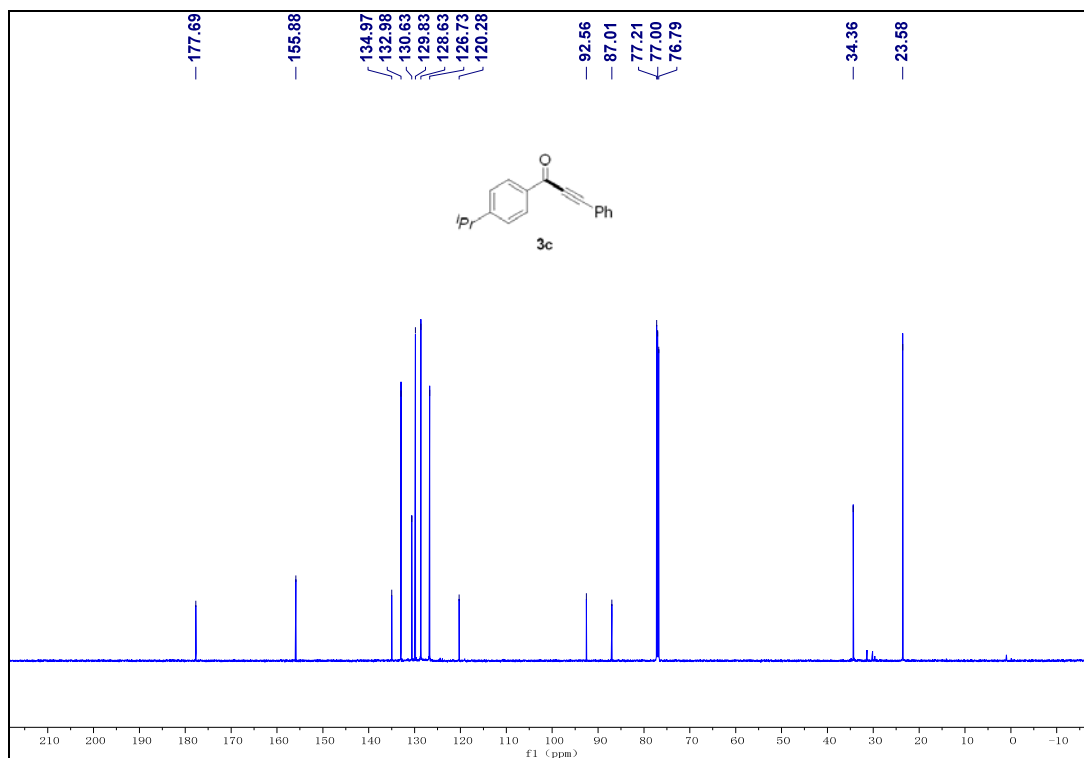

**Figure S9.** <sup>13</sup>C NMR spectrum of **3c** (150 MHz, CDCl<sub>3</sub>, 298 K).



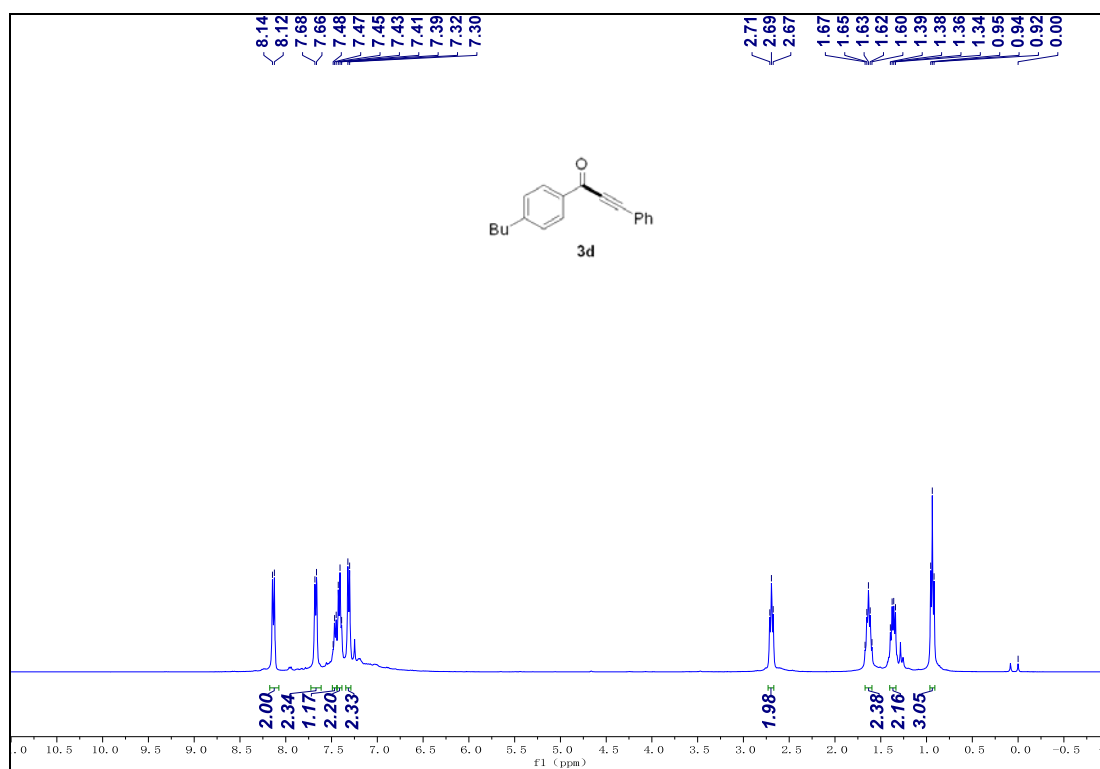

**Figure S10.** <sup>1</sup>H NMR spectrum of **3d** (400 MHz, CDCl<sub>3</sub>, 298 K).

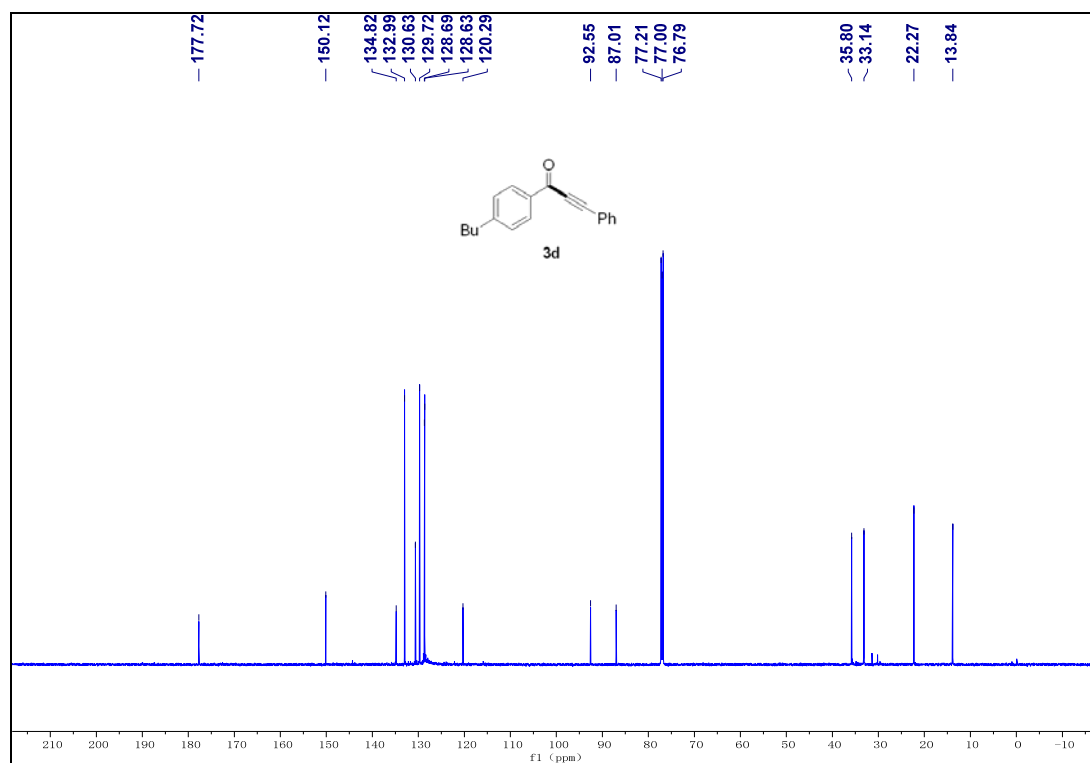

**Figure S11.** <sup>13</sup>C NMR spectrum of **3d** (150 MHz, CDCl<sub>3</sub>, 298 K).

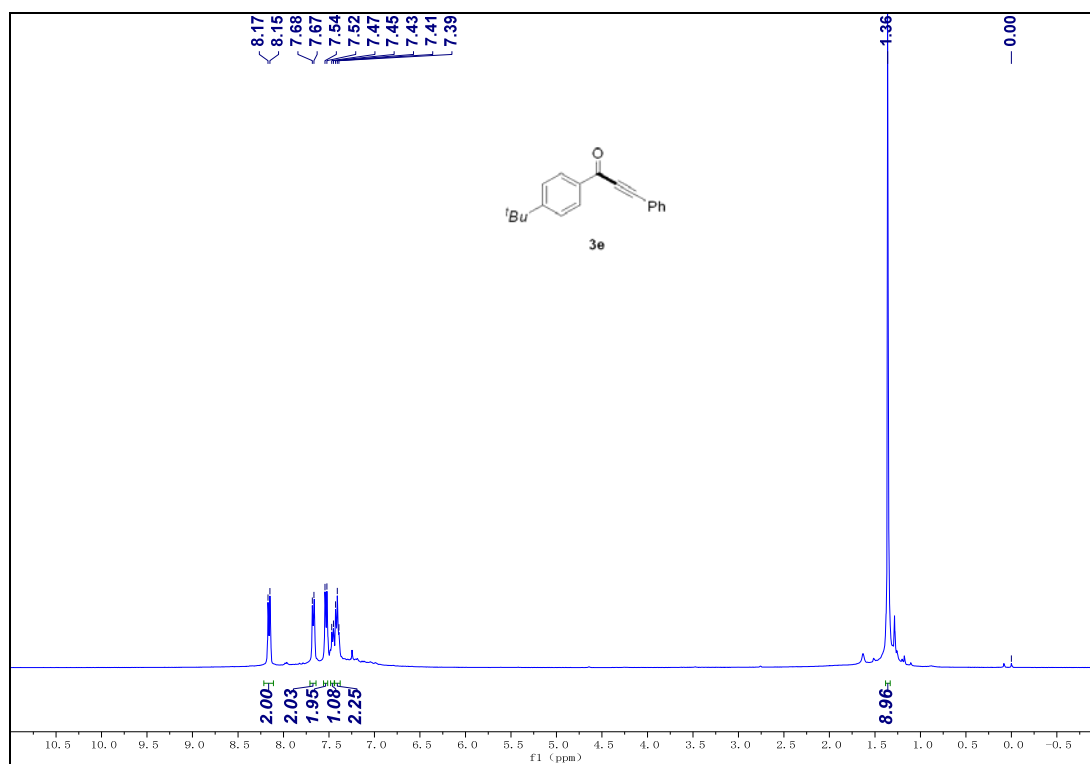

**Figure S12.** <sup>1</sup>H NMR spectrum of **3e** (400 MHz, CDCl<sub>3</sub>, 298 K).

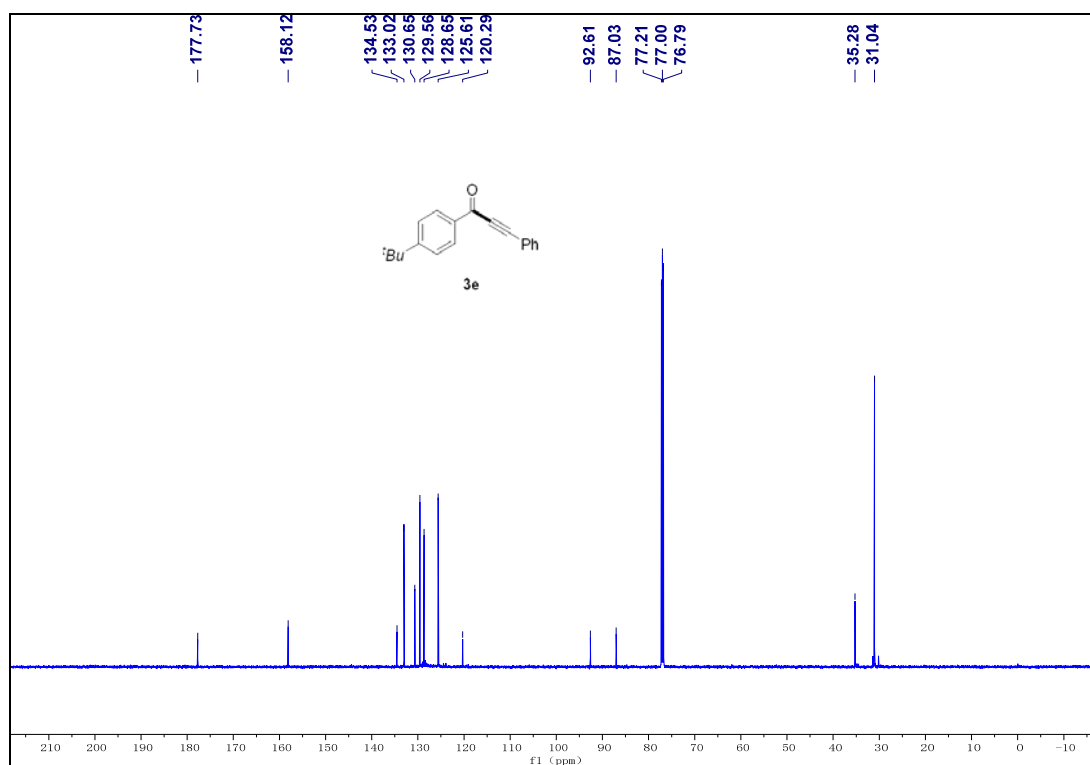

**Figure S13.** <sup>13</sup>C NMR spectrum of **3e** (150 MHz, CDCl<sub>3</sub>, 298 K).

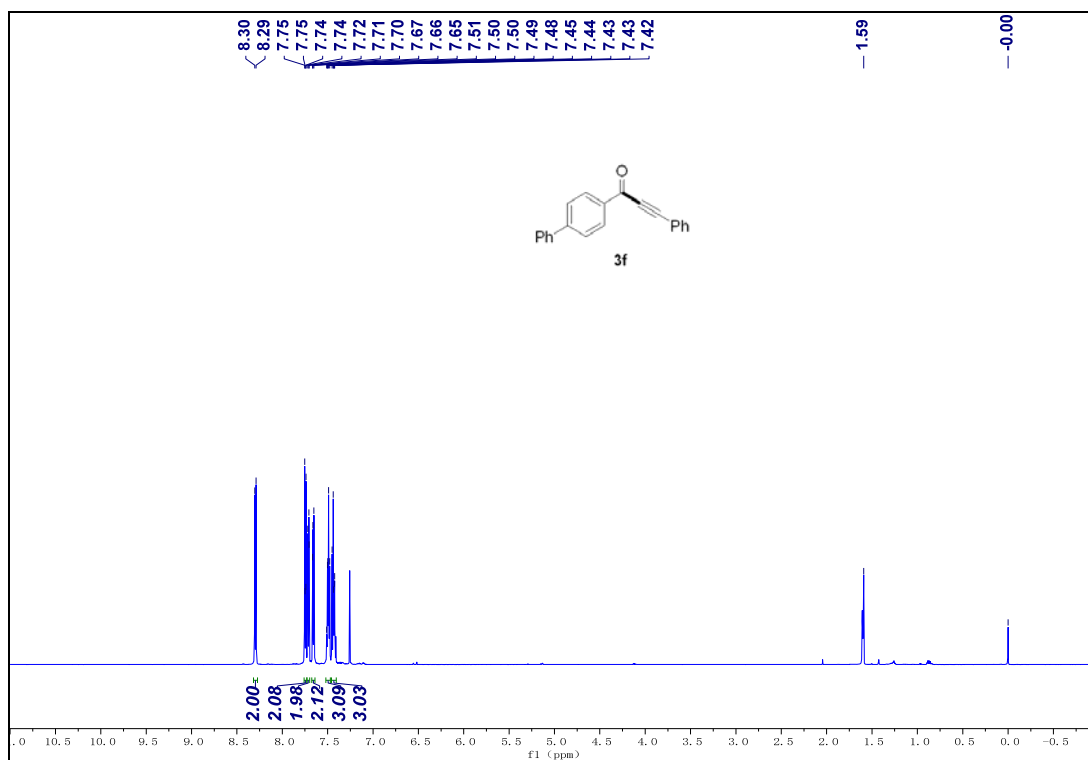

**Figure S14.** <sup>1</sup>H NMR spectrum of **3f** (600 MHz, CDCl<sub>3</sub>, 298 K).

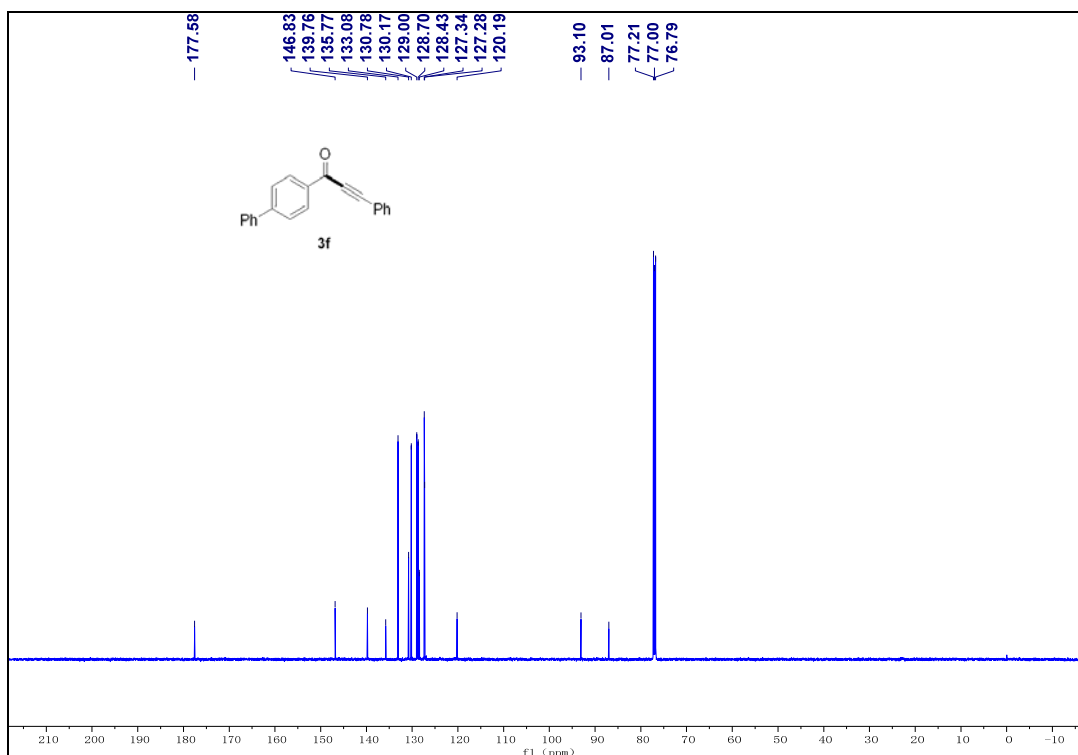

**Figure S15.** <sup>13</sup>C NMR spectrum of **3f** (150 MHz, CDCl<sub>3</sub>, 298 K).

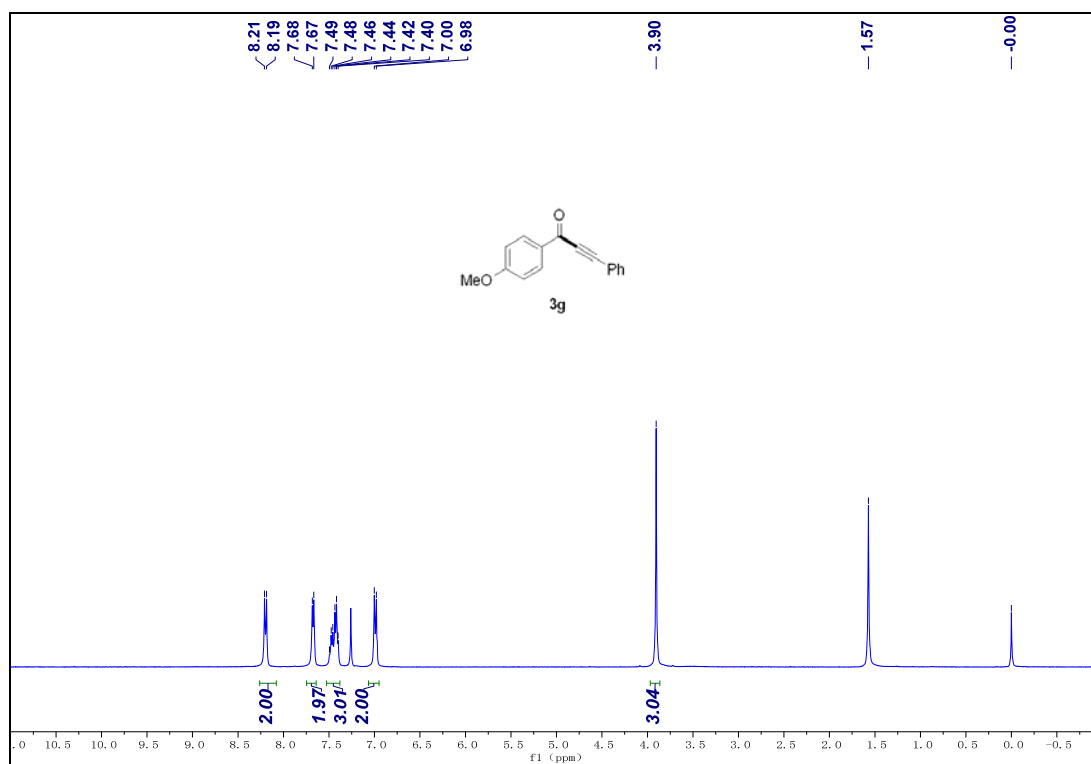

**Figure S16.** <sup>1</sup>H NMR spectrum of **3g** (400 MHz, CDCl<sub>3</sub>, 298 K).

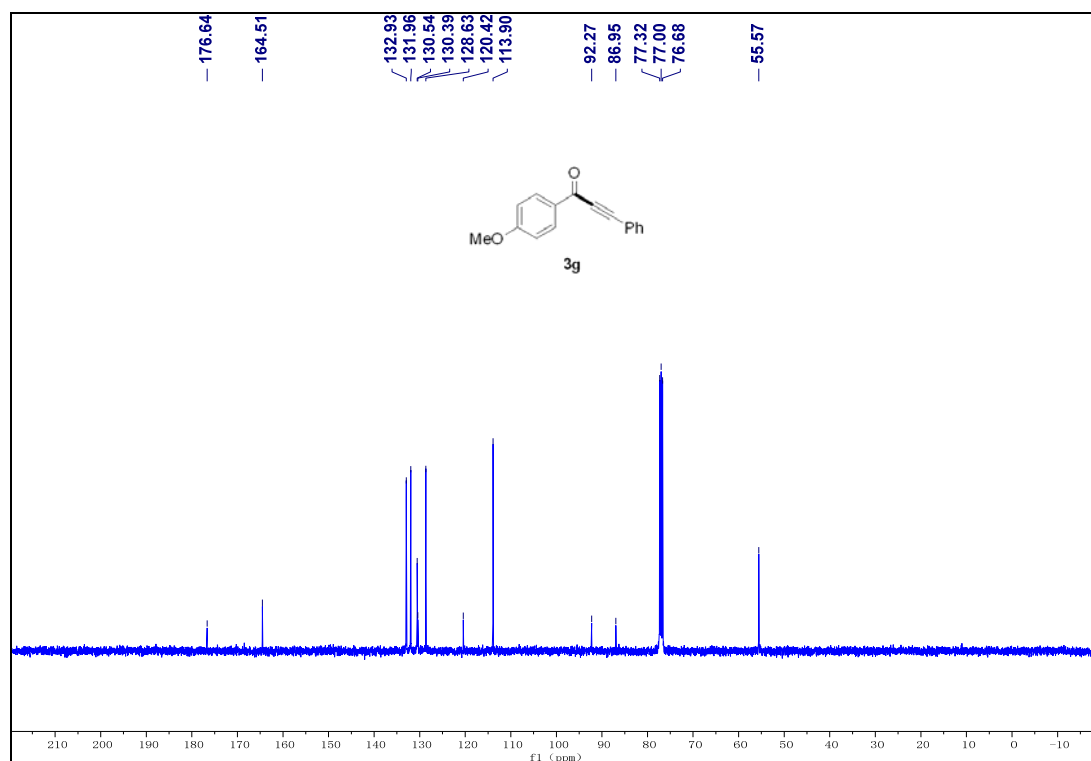

**Figure S17.** <sup>13</sup>C NMR spectrum of **3g** (100 MHz, CDCl<sub>3</sub>, 298 K).

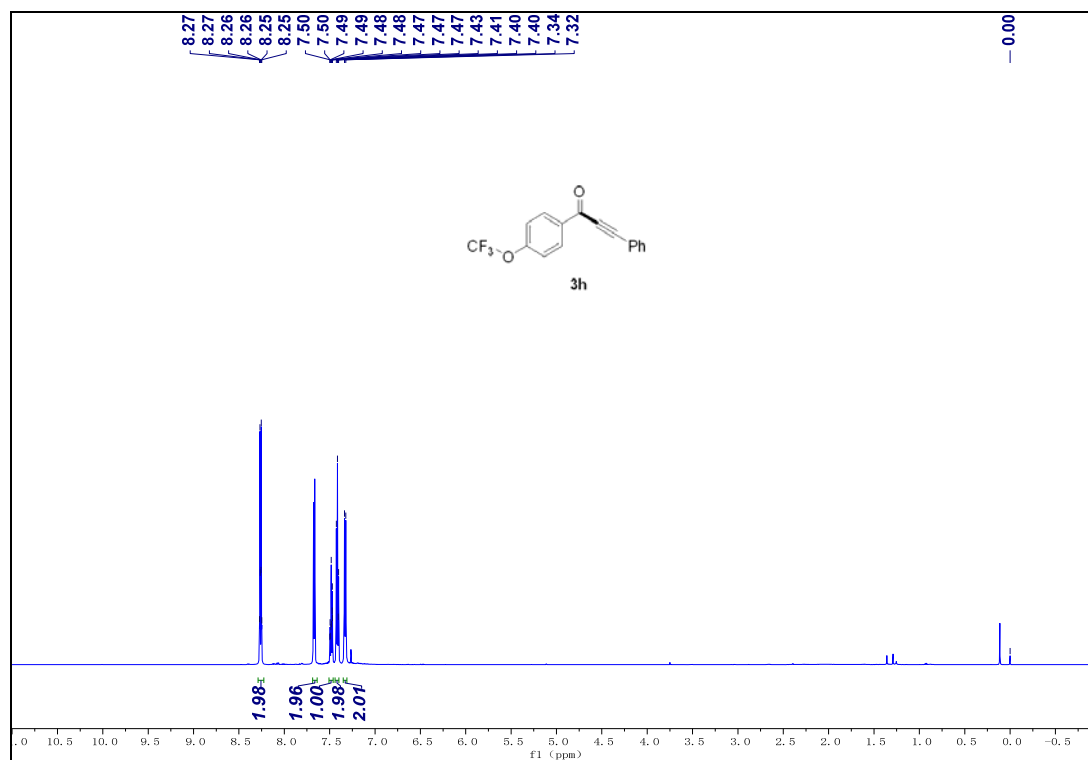

**Figure S18.** <sup>1</sup>H NMR spectrum of **3h** (600 MHz, CDCl<sub>3</sub>, 298 K).

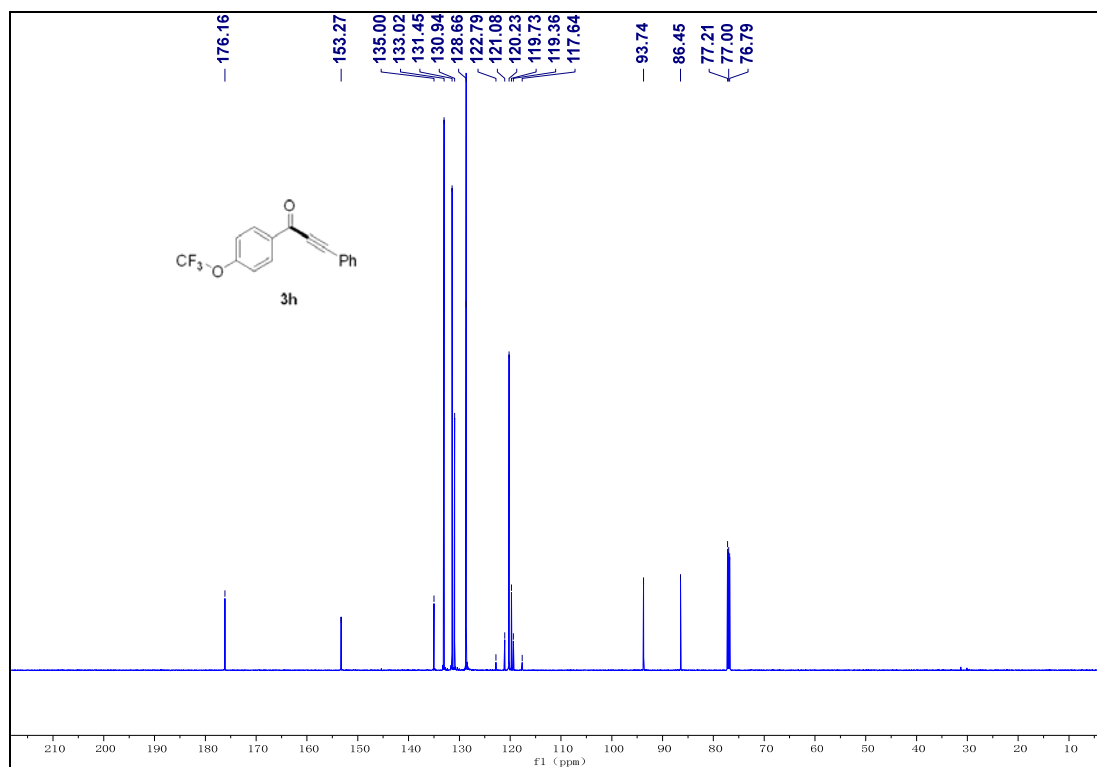

**Figure S19.** <sup>13</sup>C NMR spectrum of **3h** (150 MHz, CDCl<sub>3</sub>, 298 K).

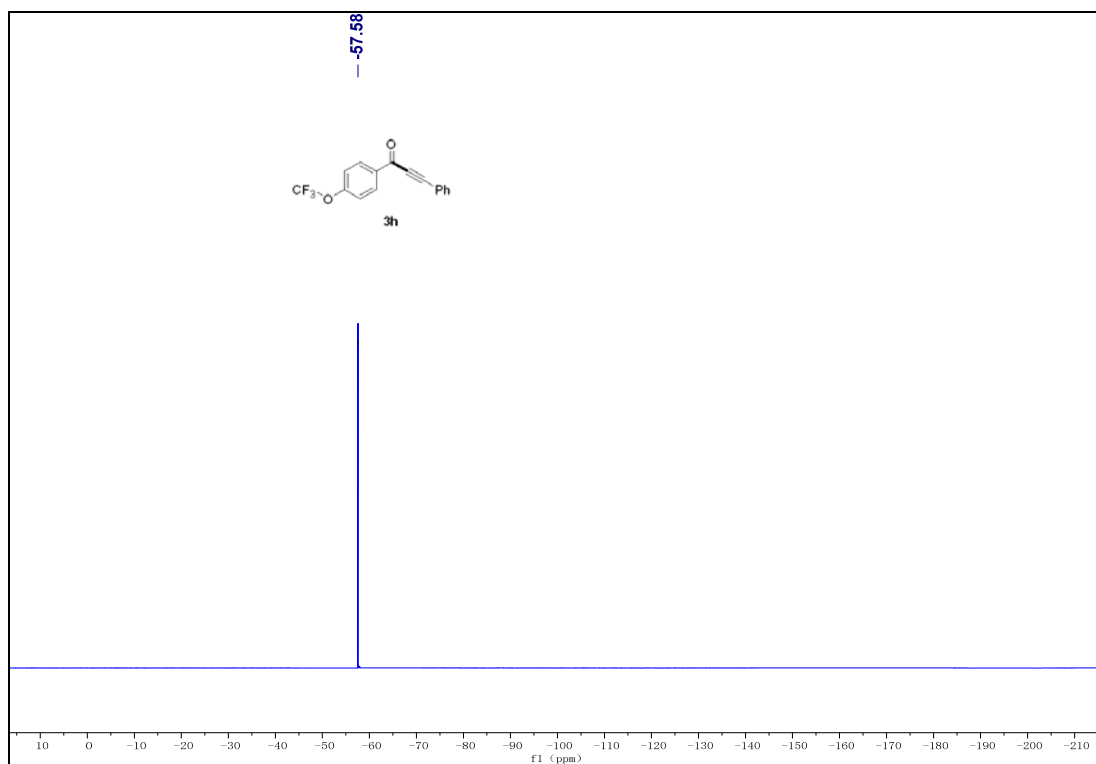

**Figure S20.** <sup>19</sup>F NMR spectrum of **3h** (565 MHz, CDCl<sub>3</sub>, 298 K).

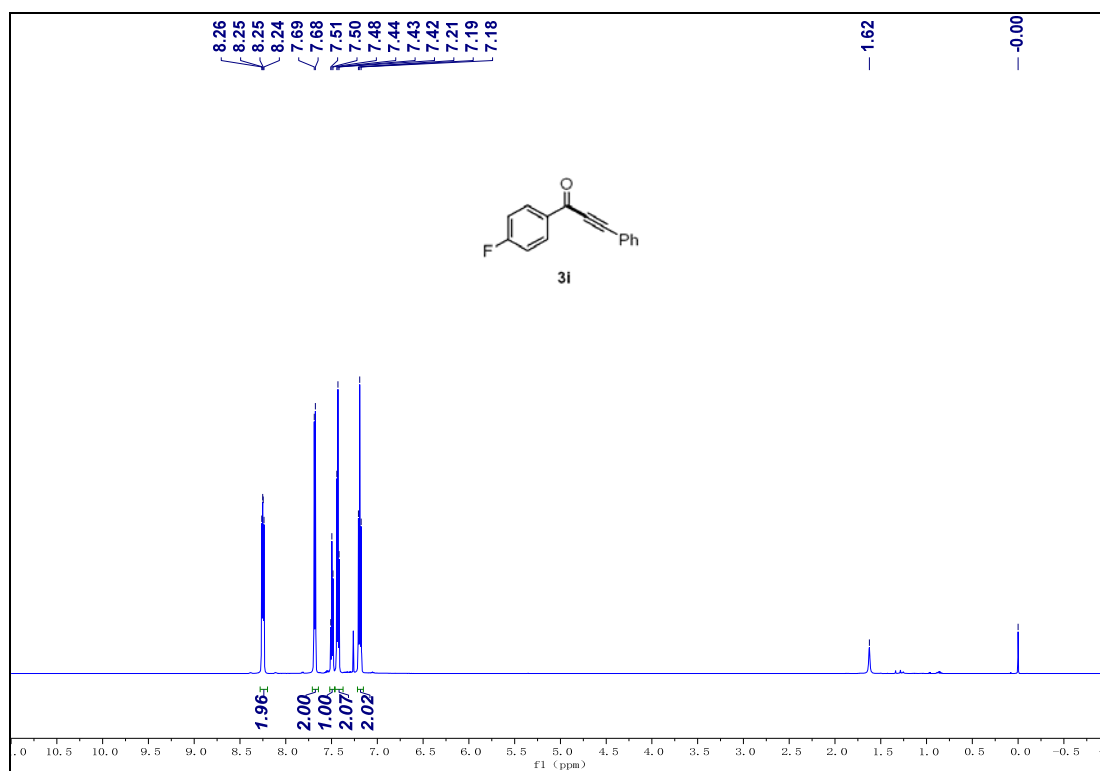

**Figure S21.** <sup>1</sup>H NMR spectrum of **3i** (600 MHz, CDCl<sub>3</sub>, 298 K).

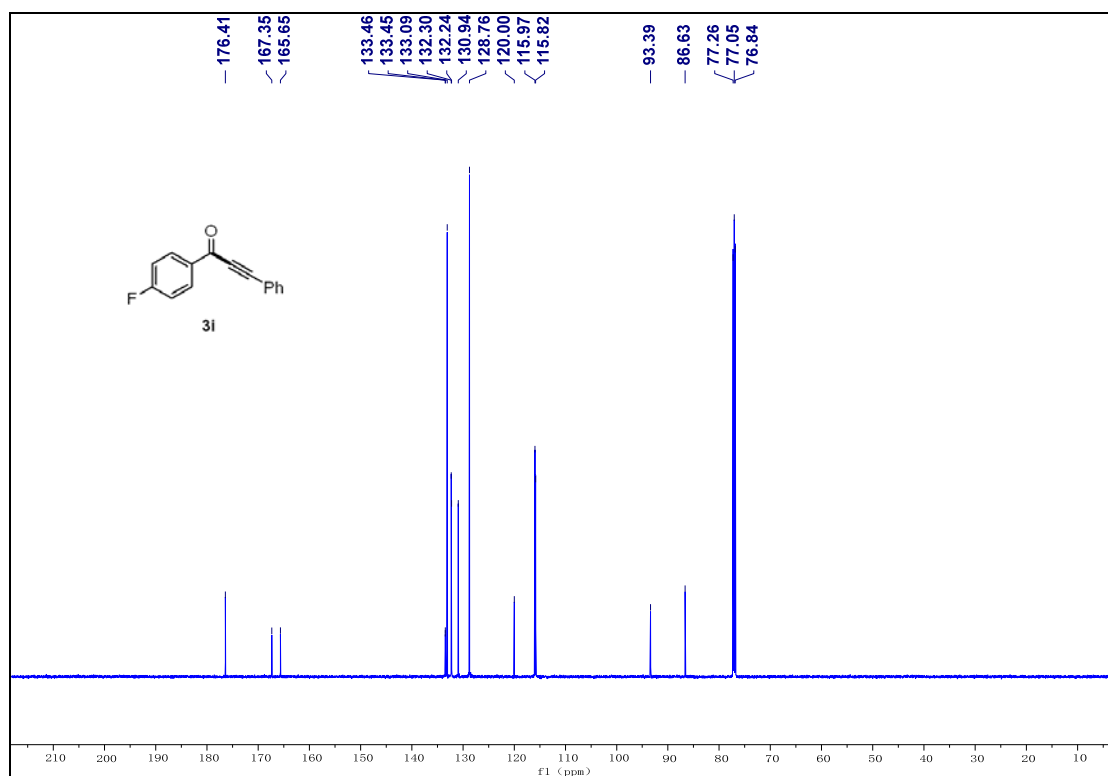

**Figure S22.** <sup>13</sup>C NMR spectrum of **3i** (150 MHz, CDCl<sub>3</sub>, 298 K).

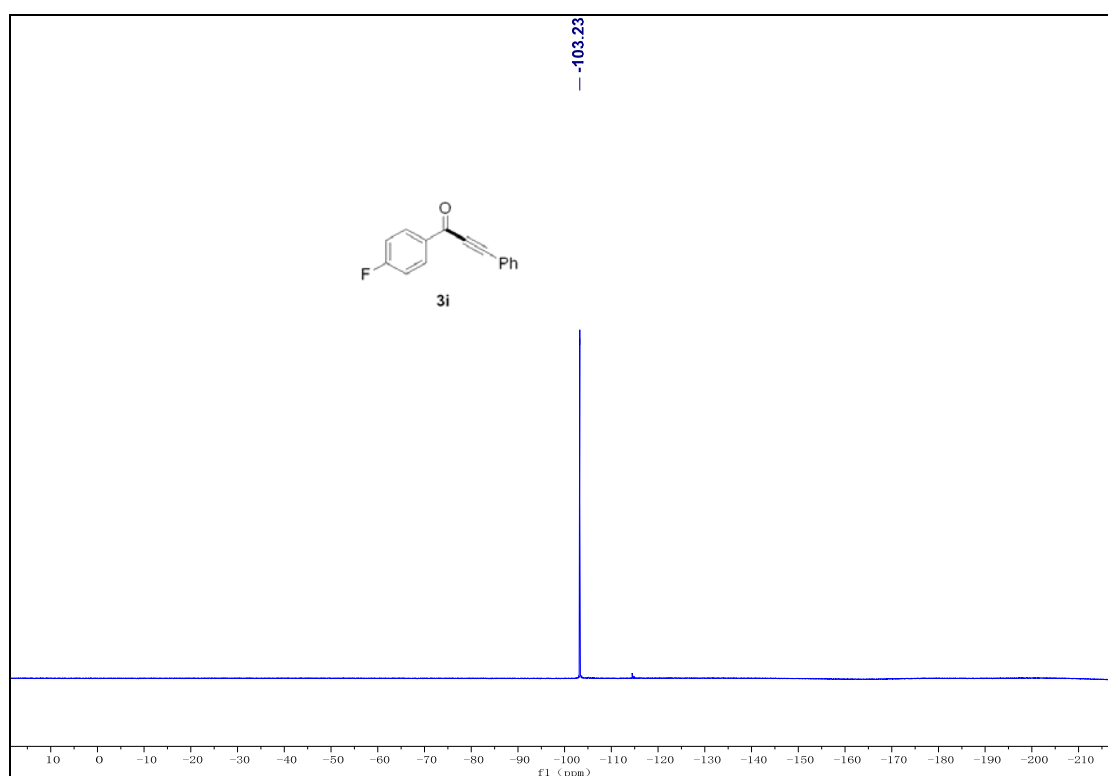

**Figure S23.** <sup>19</sup>F NMR spectrum of **3i** (376 MHz, CDCl<sub>3</sub>, 298 K).

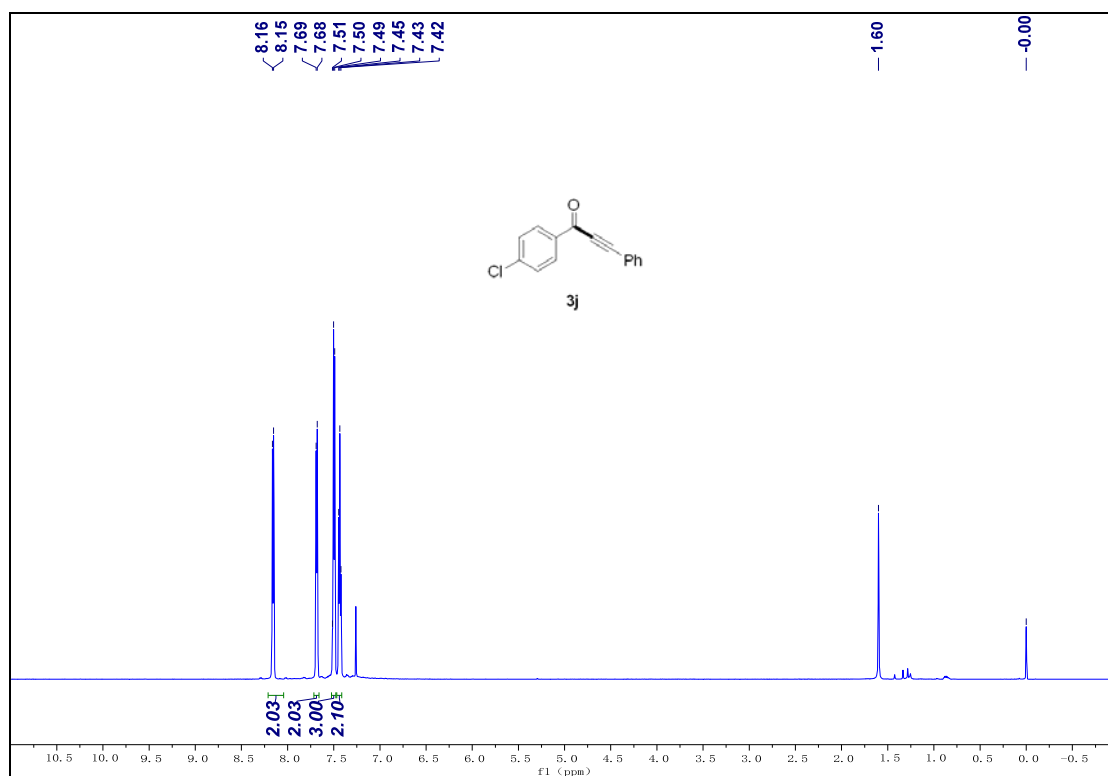

**Figure S24.** <sup>1</sup>H NMR spectrum of **3j** (600 MHz, CDCl<sub>3</sub>, 298 K).

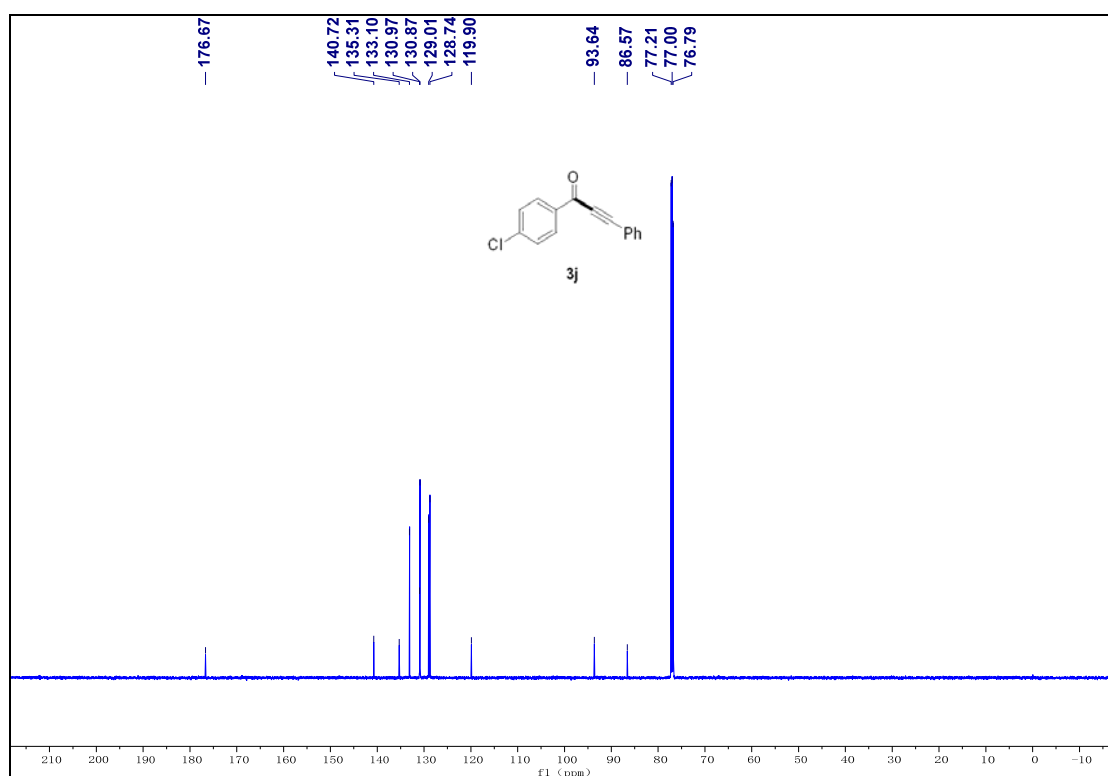

**Figure S25.** <sup>13</sup>C NMR spectrum of **3j** (150 MHz, CDCl<sub>3</sub>, 298 K).



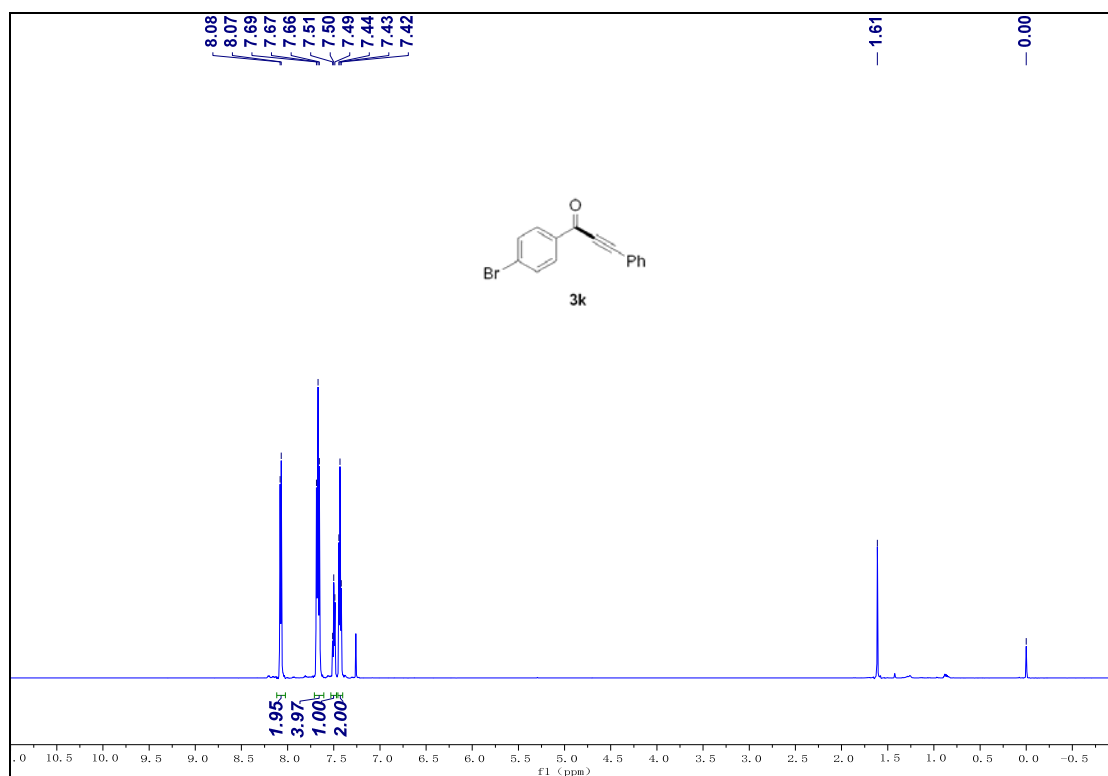

**Figure S26.** <sup>1</sup>H NMR spectrum of **3k** (600 MHz, CDCl<sub>3</sub>, 298 K).

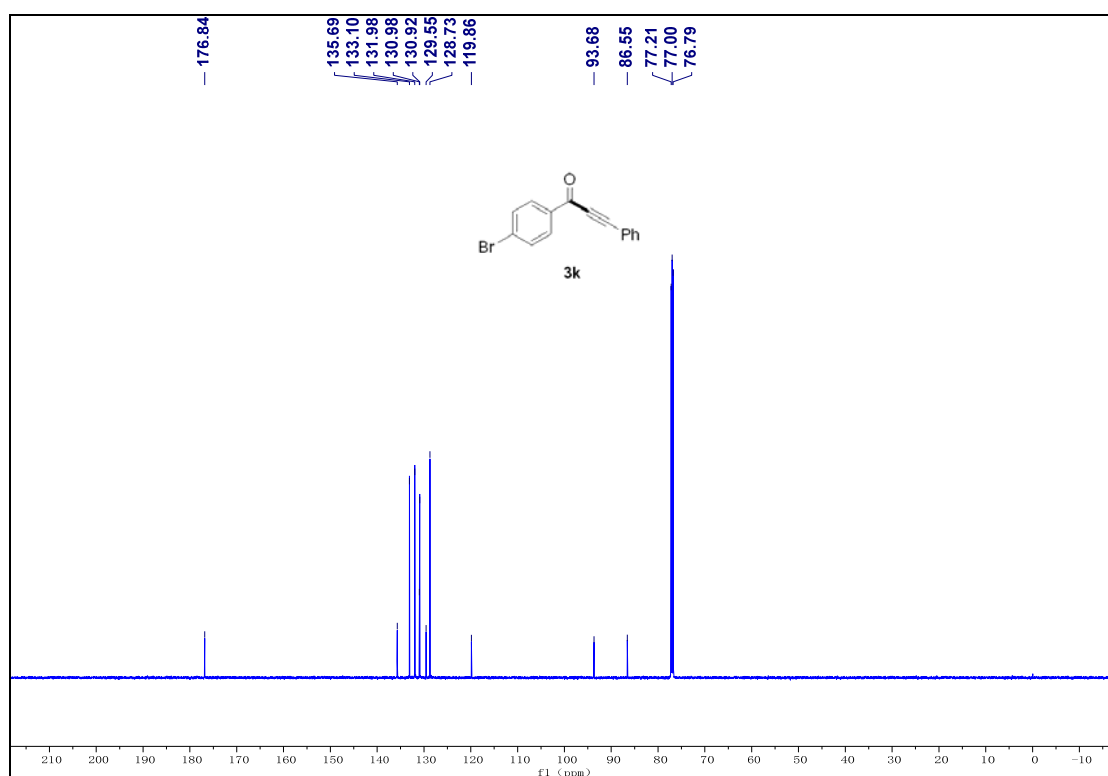

**Figure S27.** <sup>13</sup>C NMR spectrum of **3k** (150 MHz, CDCl<sub>3</sub>, 298 K).

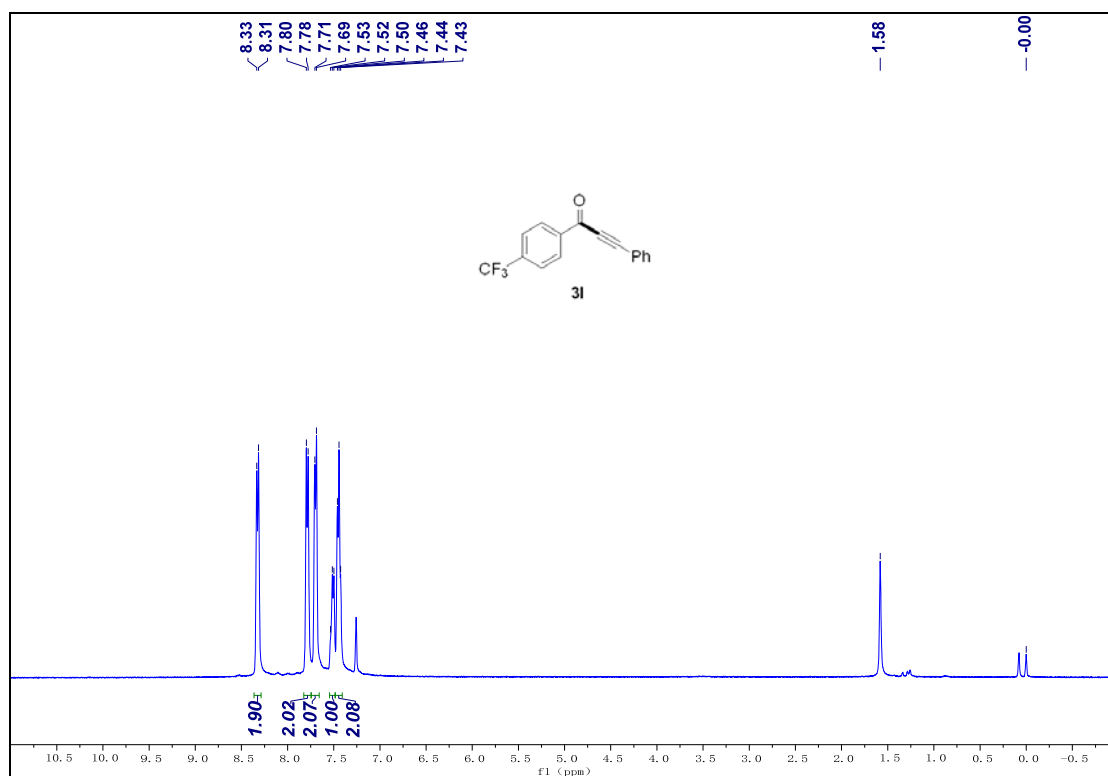

**Figure S28.** <sup>1</sup>H NMR spectrum of **3I** (400 MHz, CDCl<sub>3</sub>, 298 K).

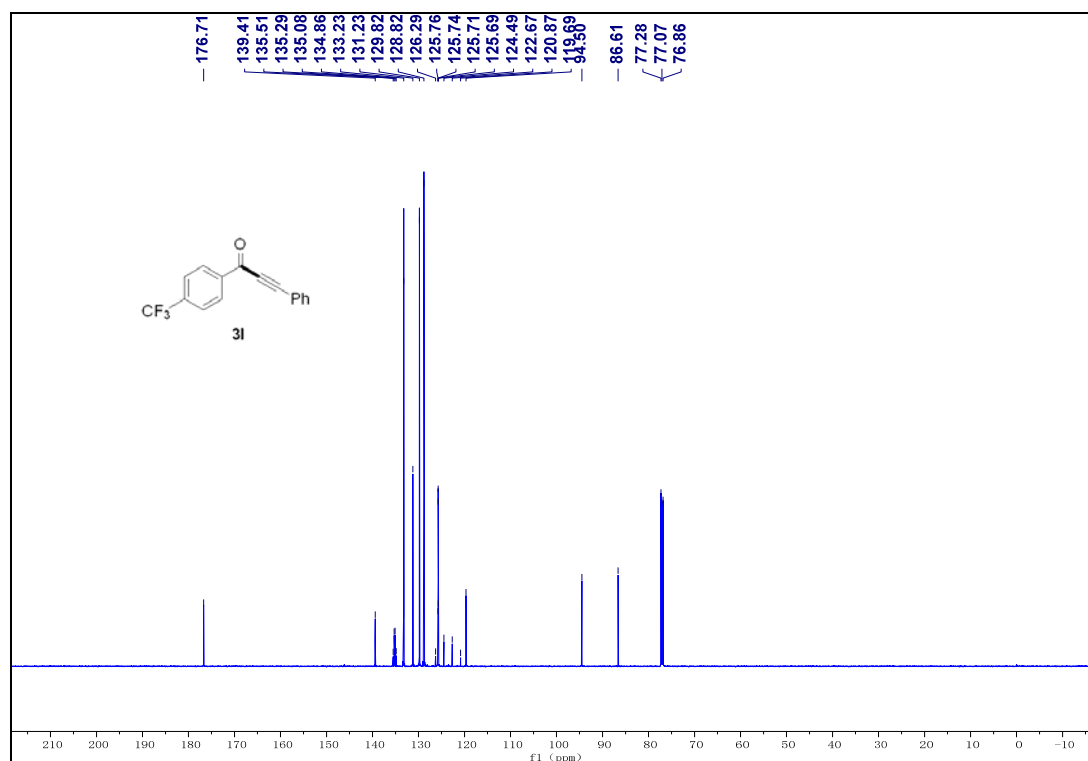

**Figure S29.** <sup>13</sup>C NMR spectrum of **3I** (150 MHz, CDCl<sub>3</sub>, 298 K).

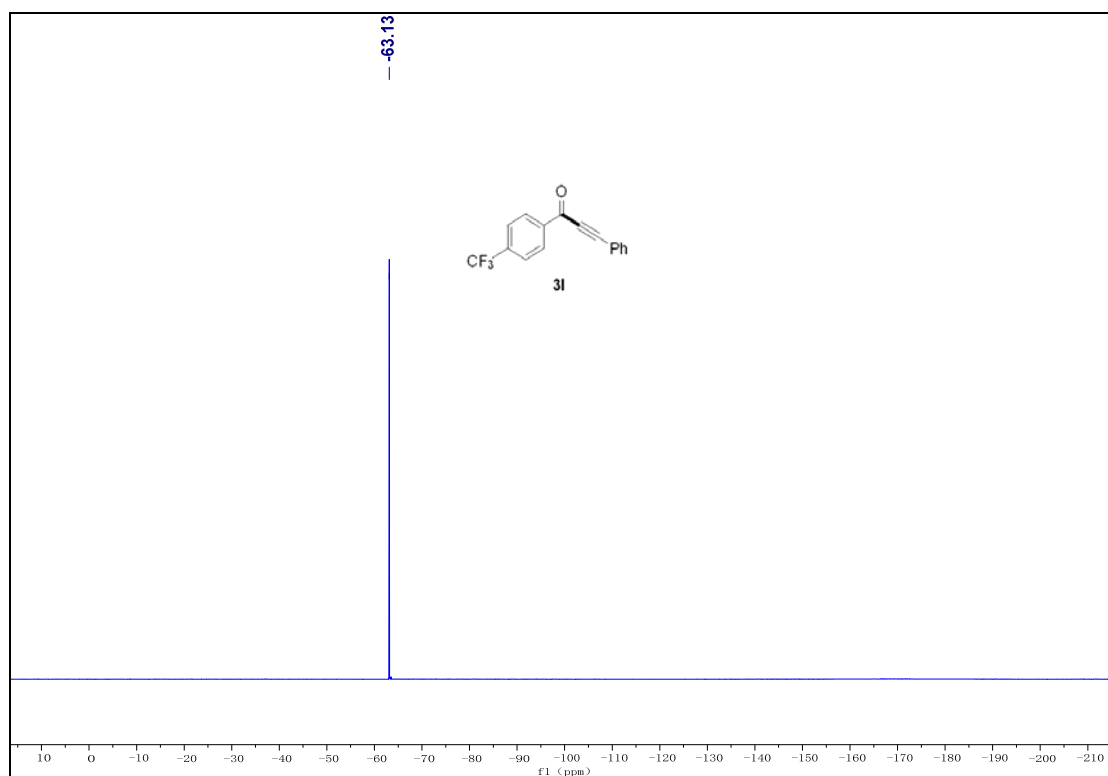

**Figure S30.** <sup>19</sup>F NMR spectrum of **3l** (565 MHz, CDCl<sub>3</sub>, 298 K).

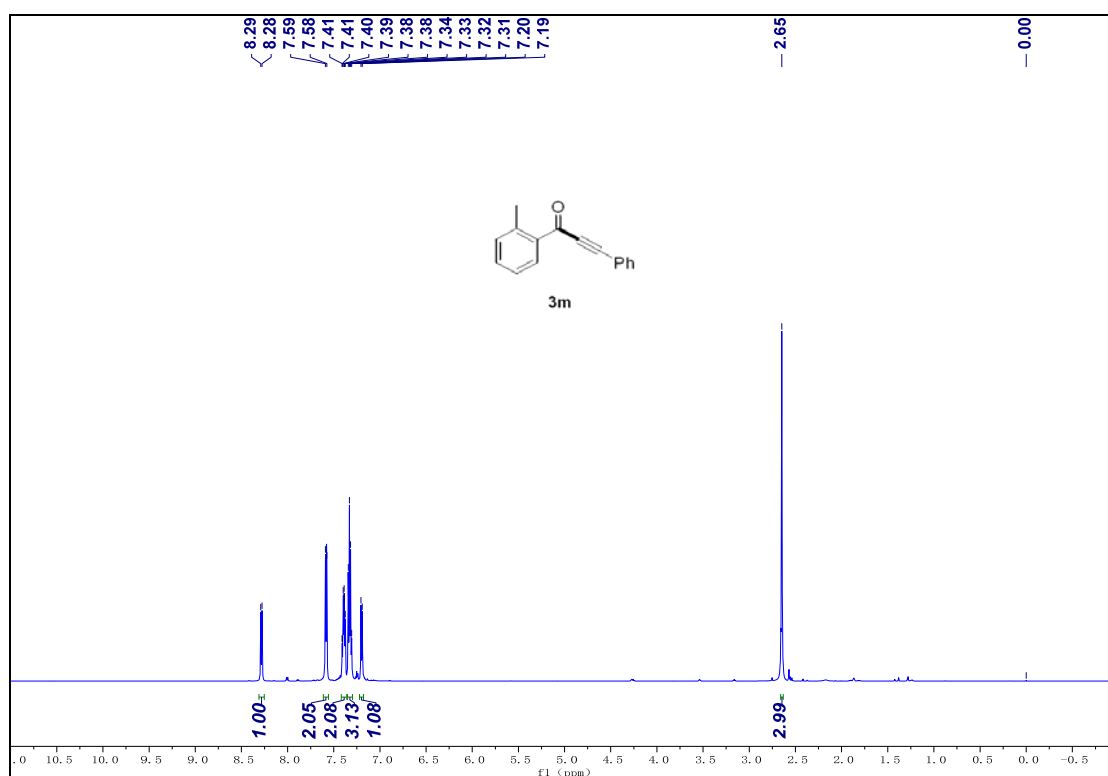

**Figure S31.** <sup>1</sup>H NMR spectrum of **3m** (600 MHz, CDCl<sub>3</sub>, 298 K).

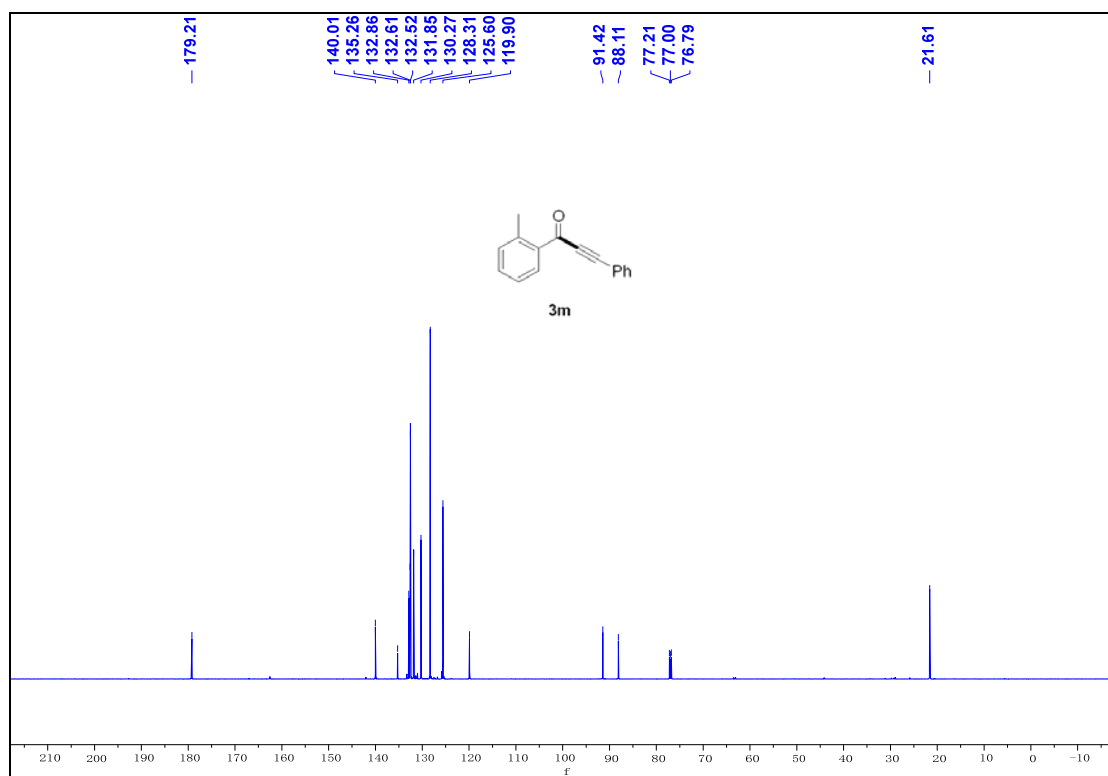

**Figure S32.** <sup>13</sup>C NMR spectrum of **3m** (150 MHz, CDCl<sub>3</sub>, 298 K).

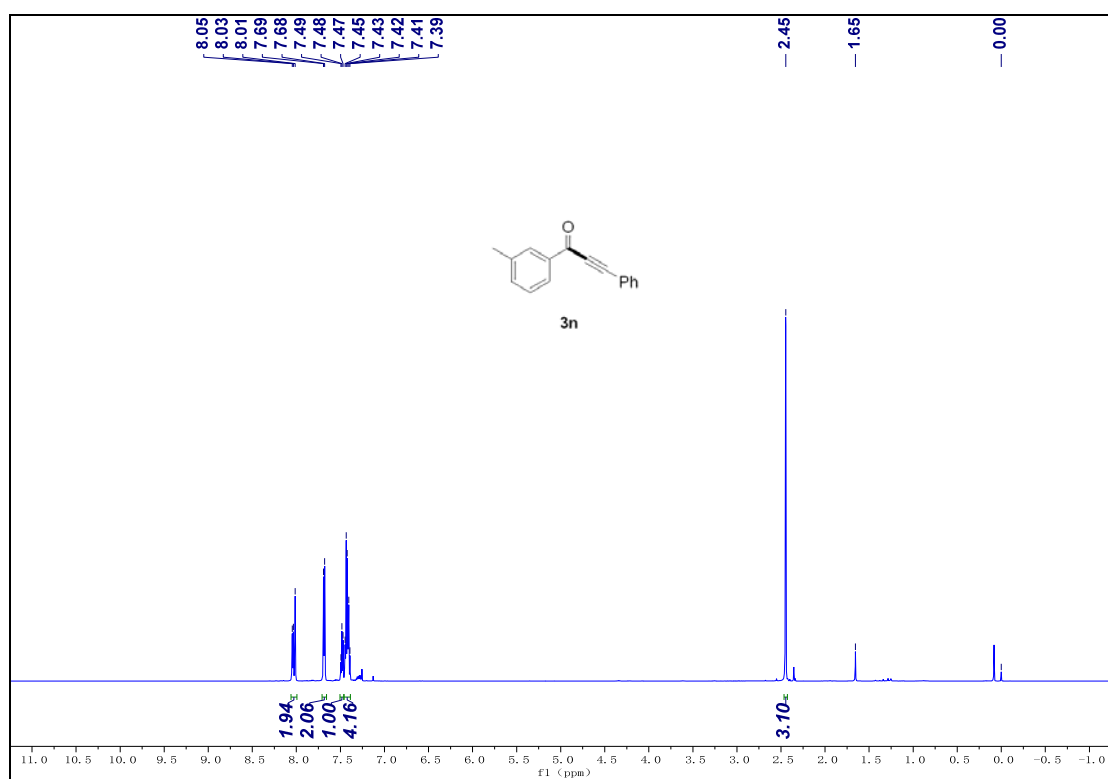

**Figure S33.** <sup>1</sup>H NMR spectrum of **3n** (600 MHz, CDCl<sub>3</sub>, 298 K).

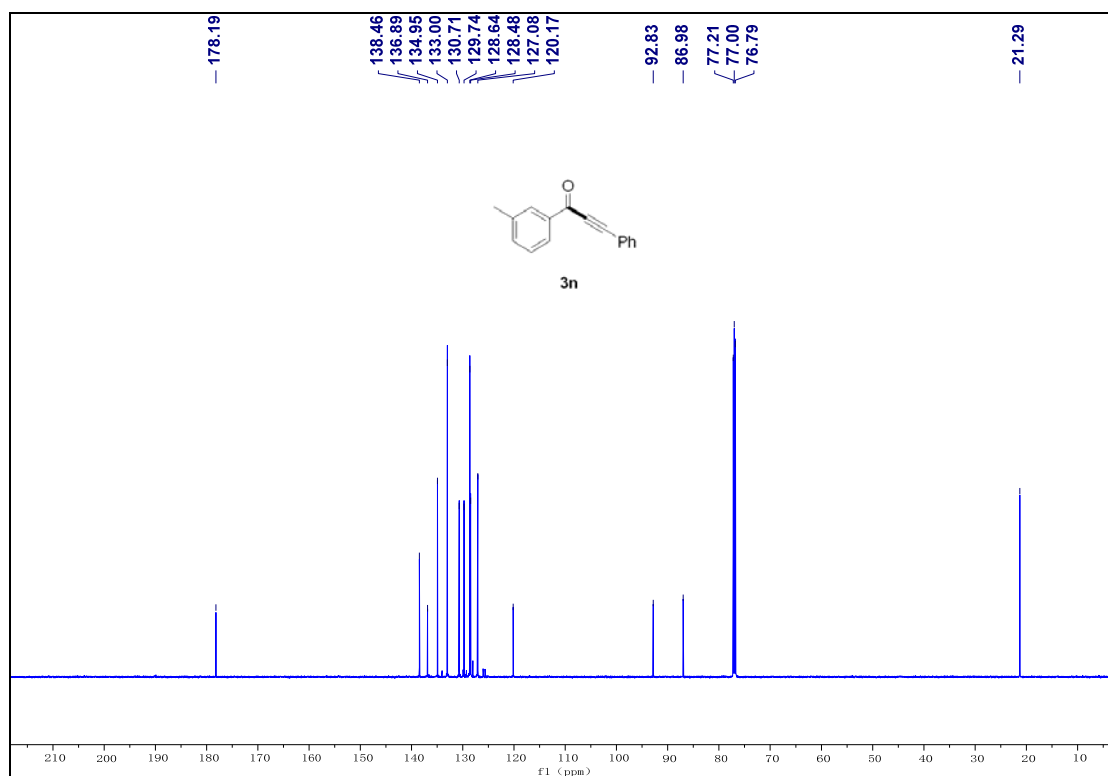

**Figure S34.** <sup>13</sup>C NMR spectrum of **3n** (150 MHz, CDCl<sub>3</sub>, 298 K).

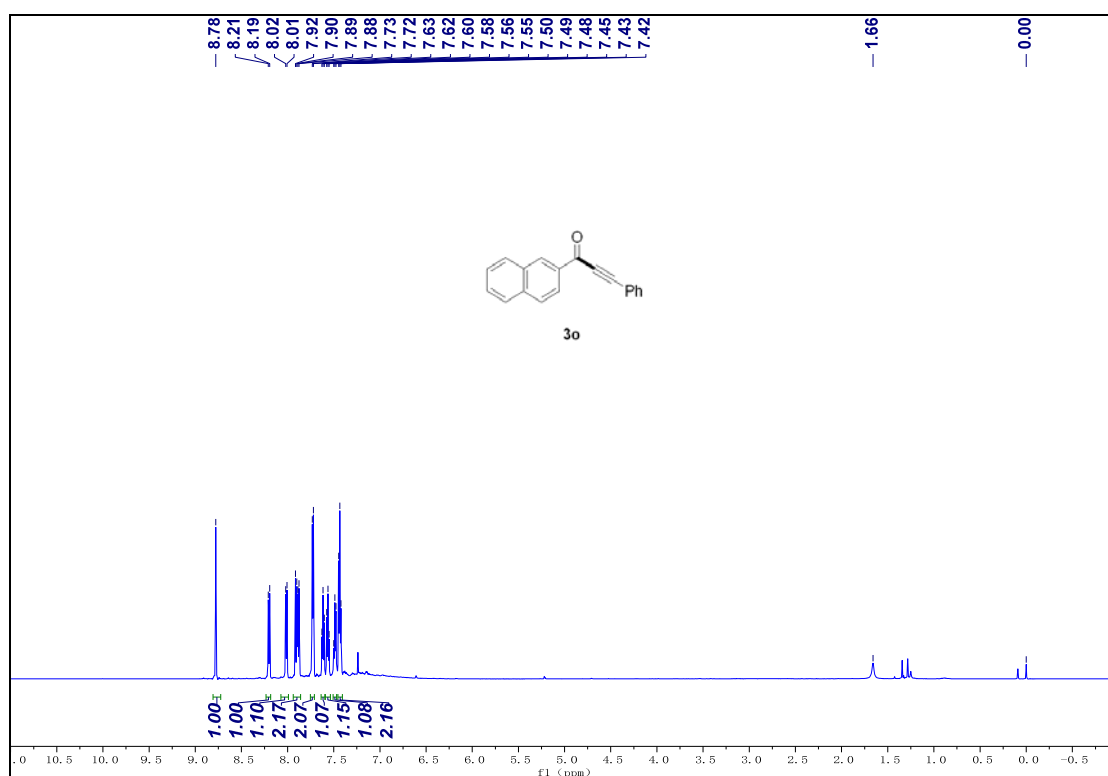

**Figure S35.** <sup>1</sup>H NMR spectrum of **3o** (600 MHz, CDCl<sub>3</sub>, 298 K).

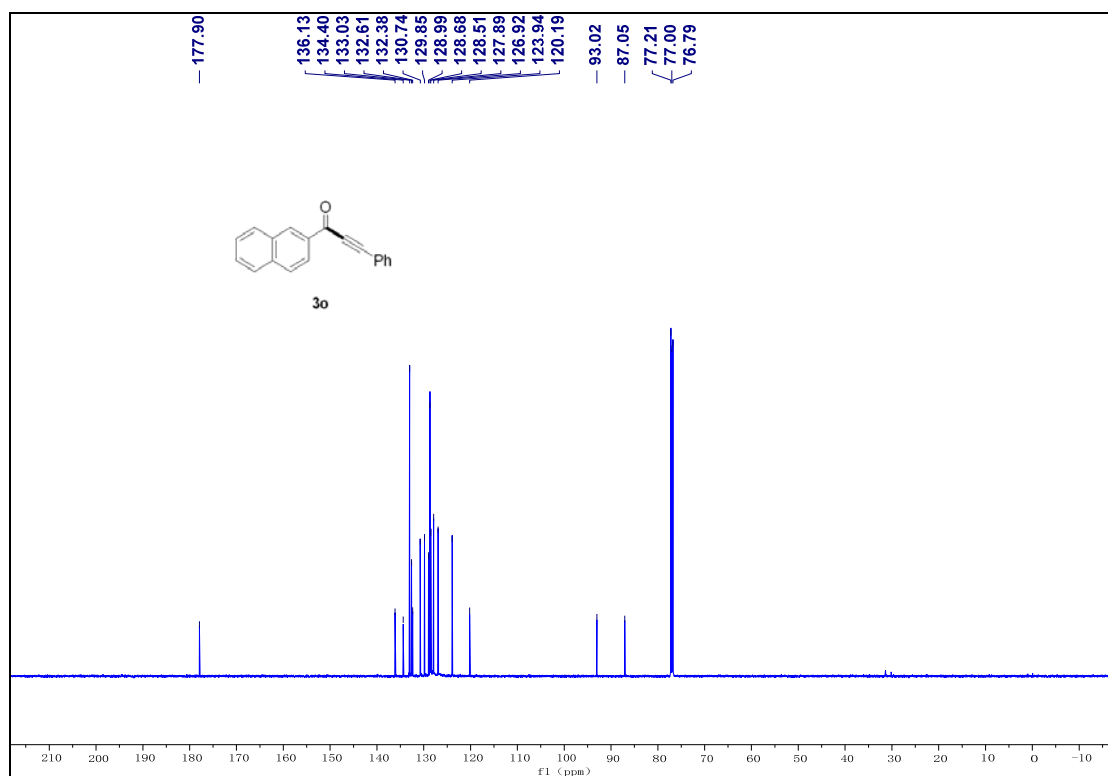

**Figure S36.** <sup>13</sup>C NMR spectrum of **3o** (150 MHz, CDCl<sub>3</sub>, 298 K).

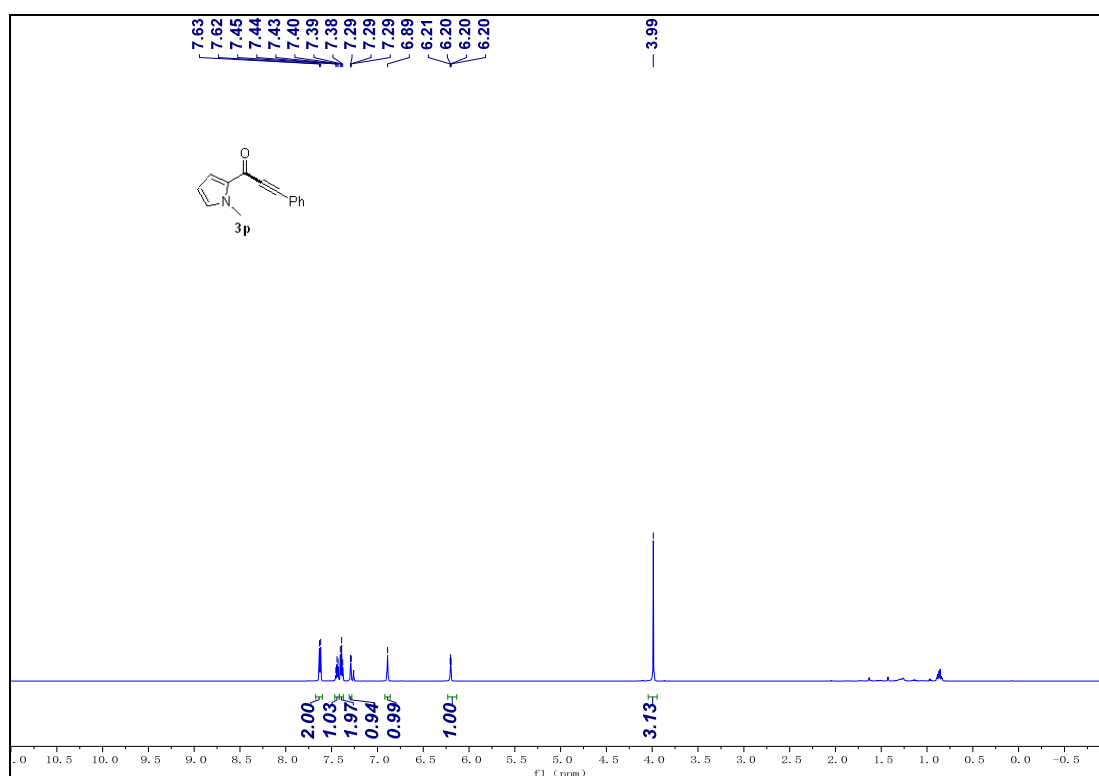

**Figure S37.** <sup>1</sup>H NMR spectrum of **3p** (600 MHz, CDCl<sub>3</sub>, 298 K).

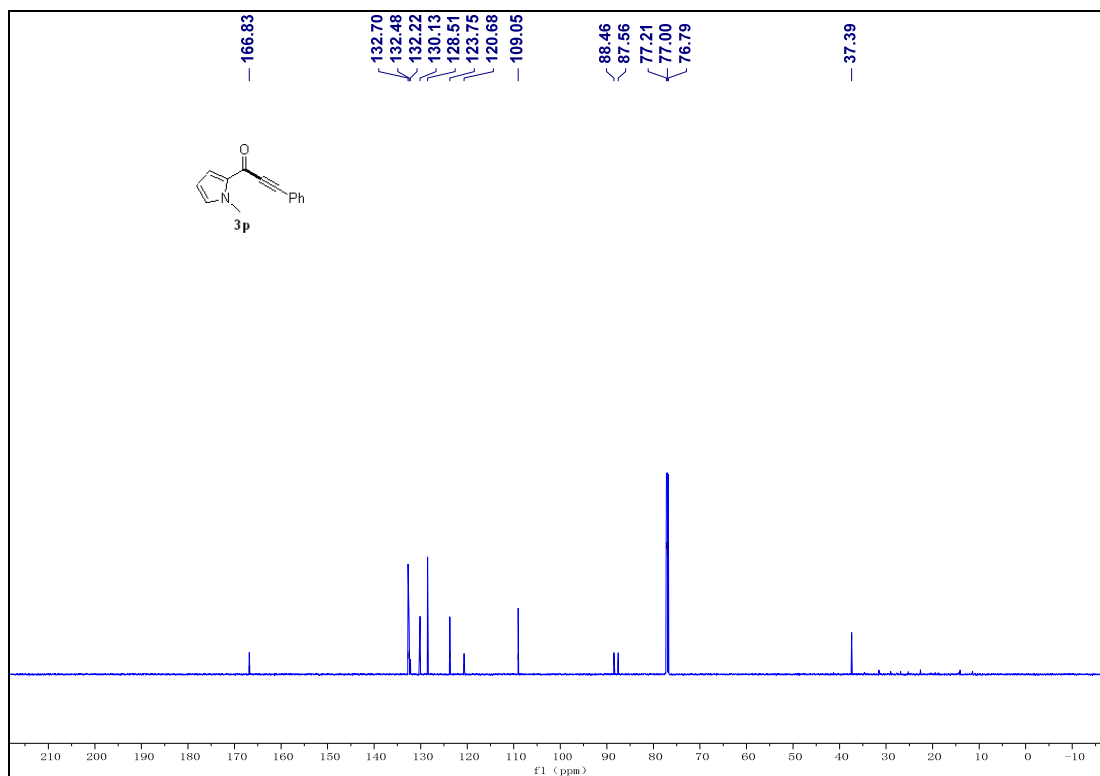

**Figure S38.** <sup>13</sup>C NMR spectrum of **3p** (150 MHz, CDCl<sub>3</sub>, 298 K).

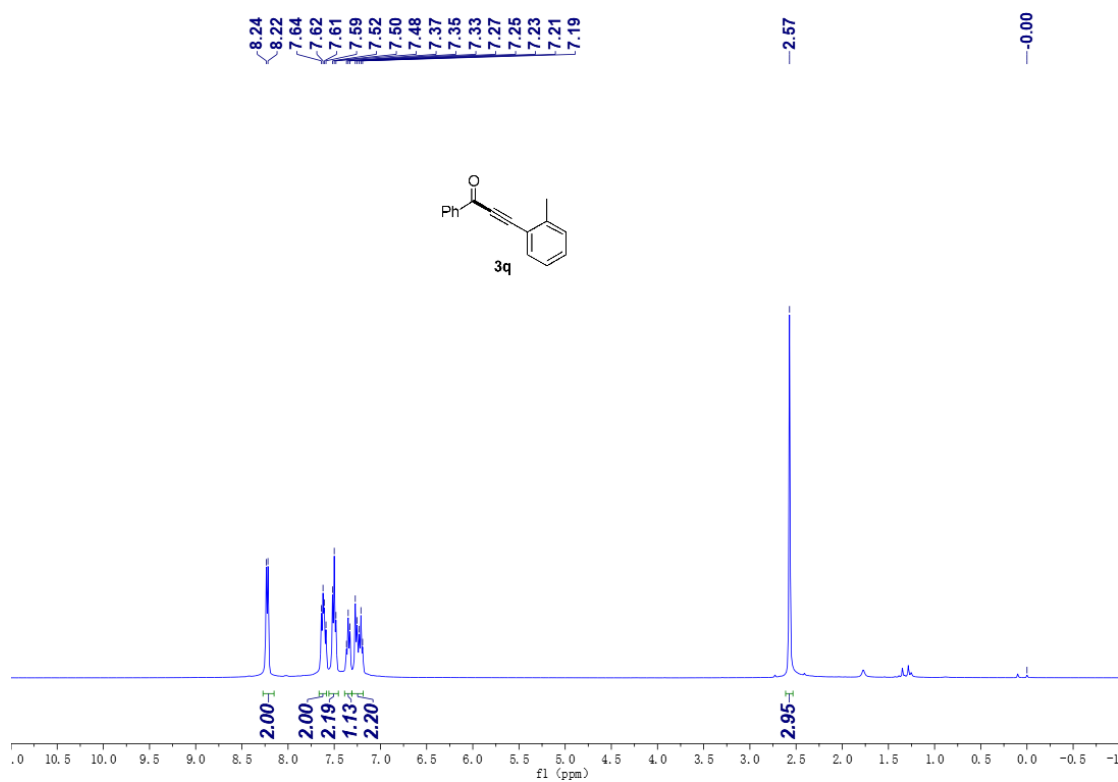

**Figure S39.** <sup>1</sup>H NMR spectrum of **3q** (400 MHz, CDCl<sub>3</sub>, 298 K).

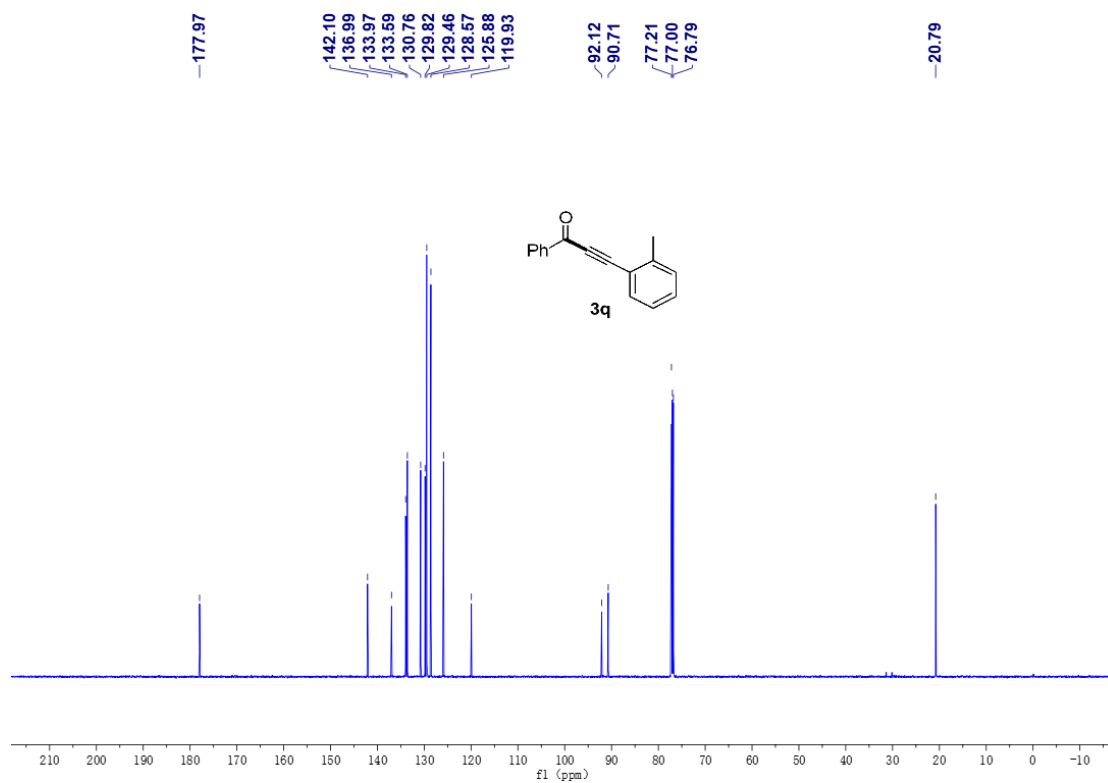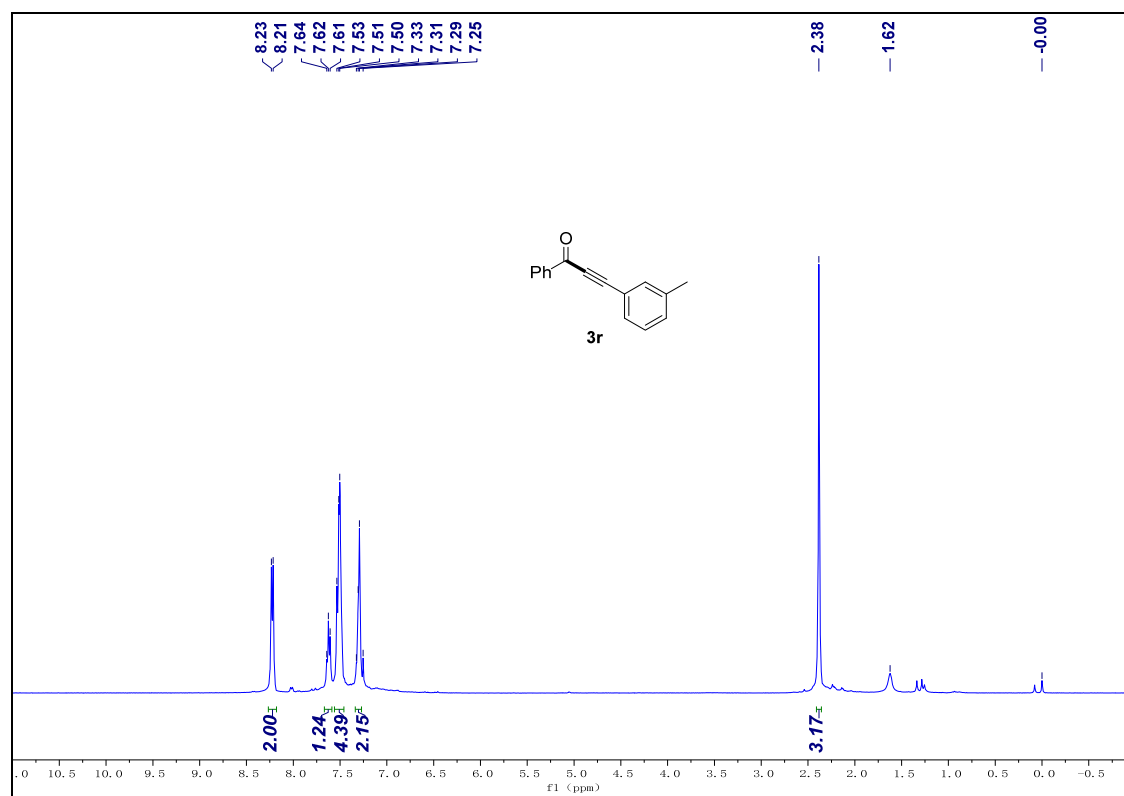



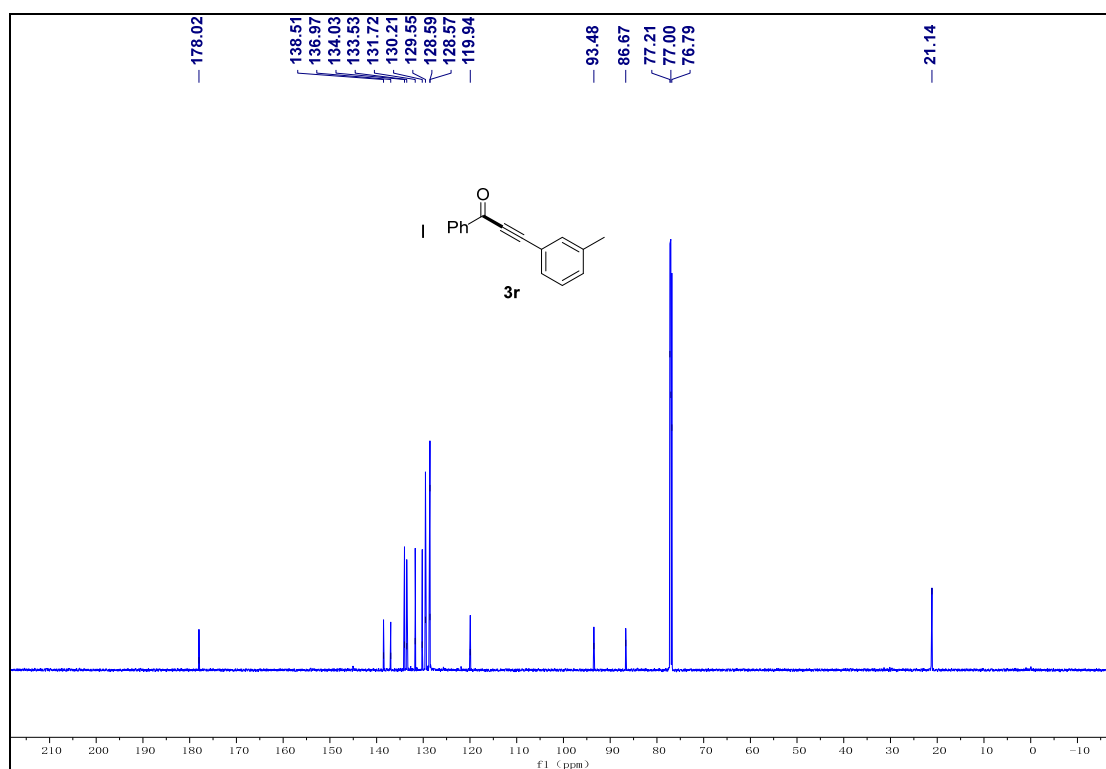

**Figure S42.** <sup>13</sup>C NMR spectrum of **3r** (150 MHz, CDCl<sub>3</sub>, 298 K).

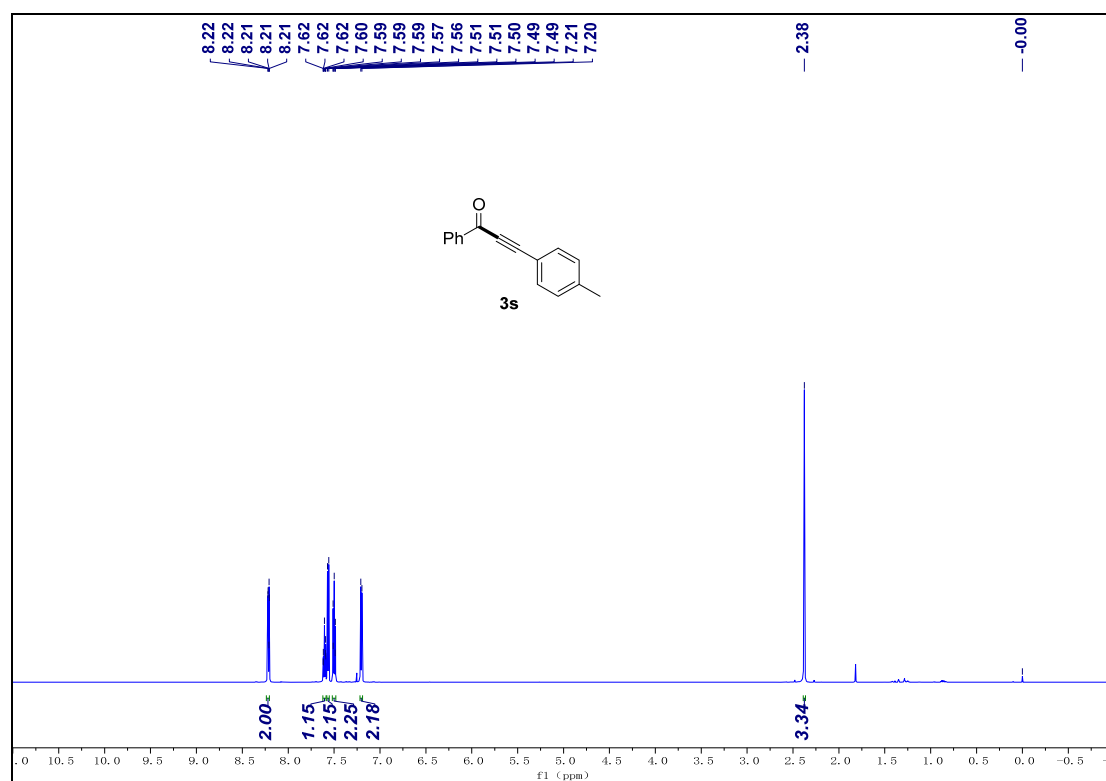

**Figure S43.** <sup>1</sup>H NMR spectrum of **3s** (600 MHz, CDCl<sub>3</sub>, 298 K).

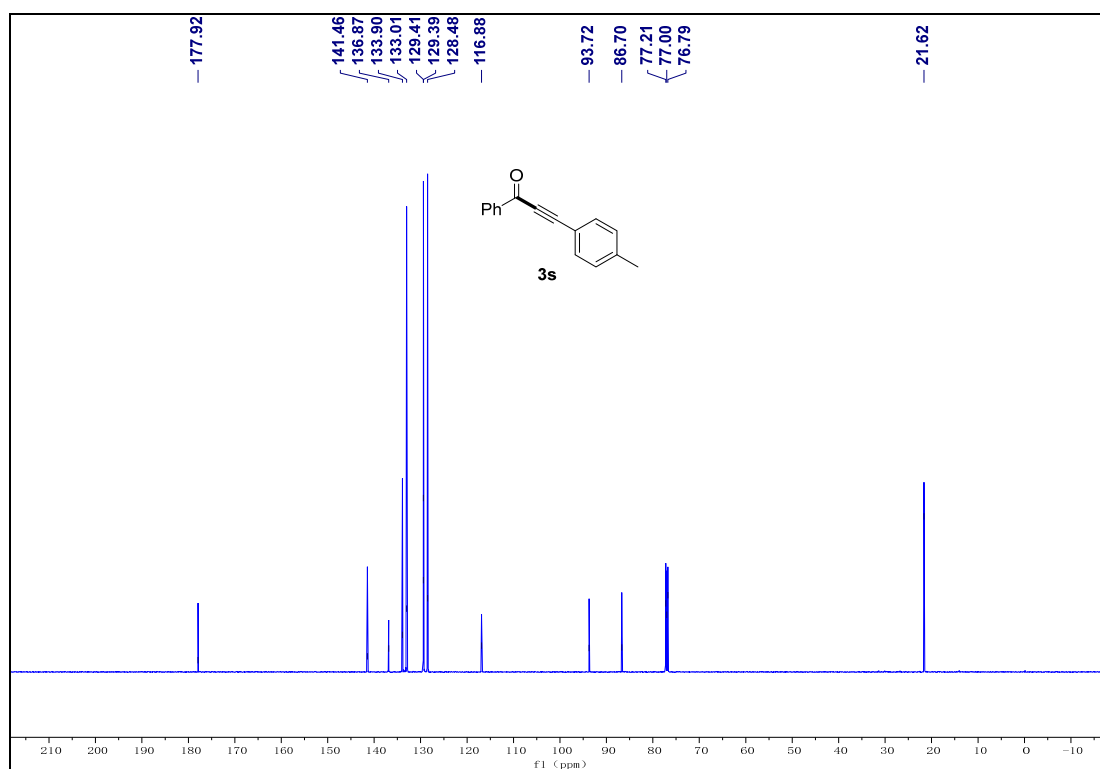

**Figure S44.** <sup>13</sup>C NMR spectrum of **3s** (150 MHz, CDCl<sub>3</sub>, 298 K).

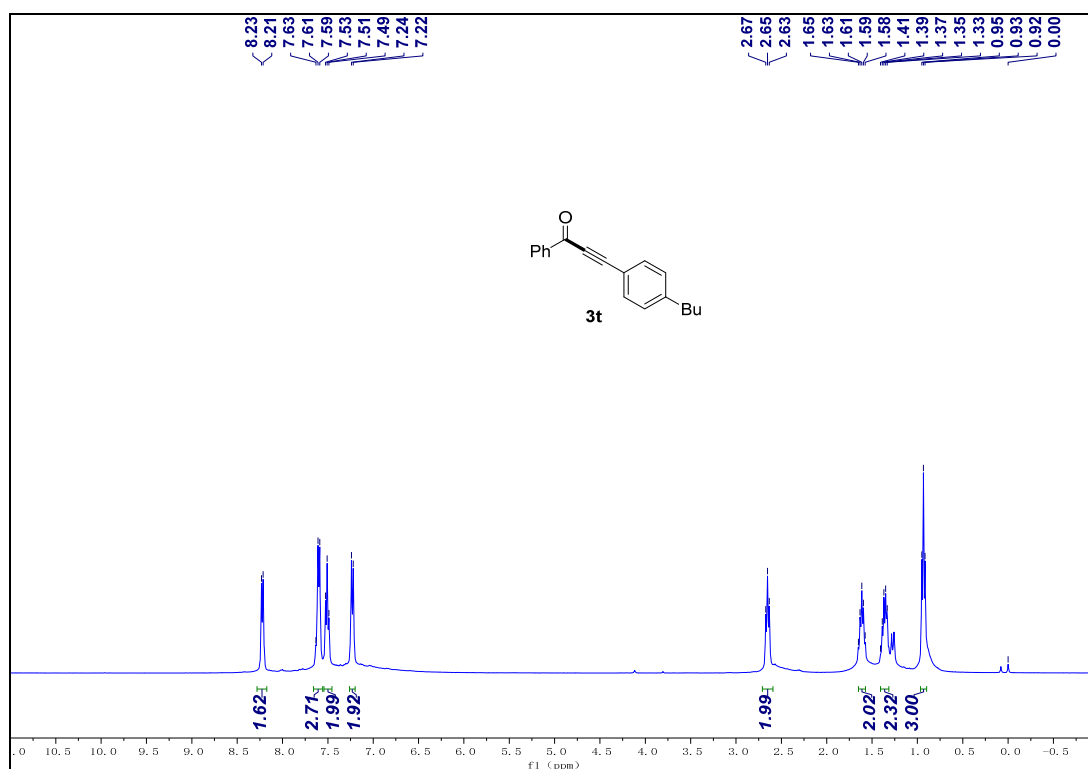

**Figure S45.** <sup>1</sup>H NMR spectrum of **3t** (400 MHz, CDCl<sub>3</sub>, 298 K).

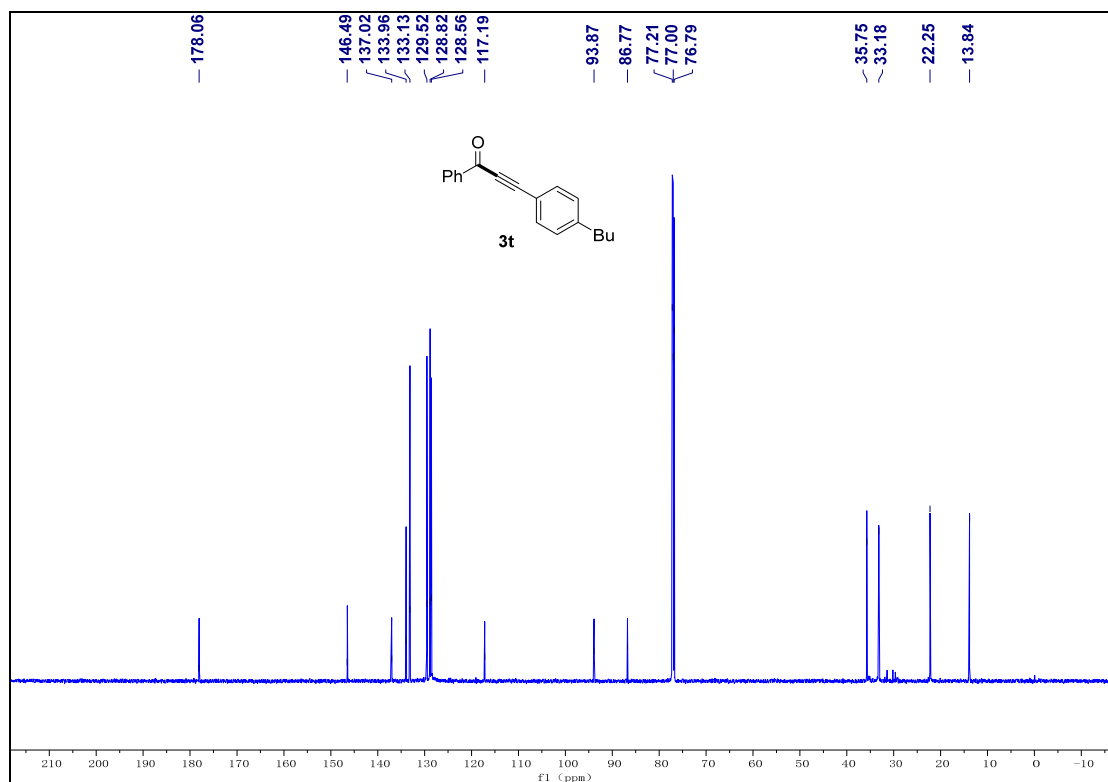

Figure S46. <sup>13</sup>C NMR spectrum of **3t** (150 MHz, CDCl<sub>3</sub>, 298 K).

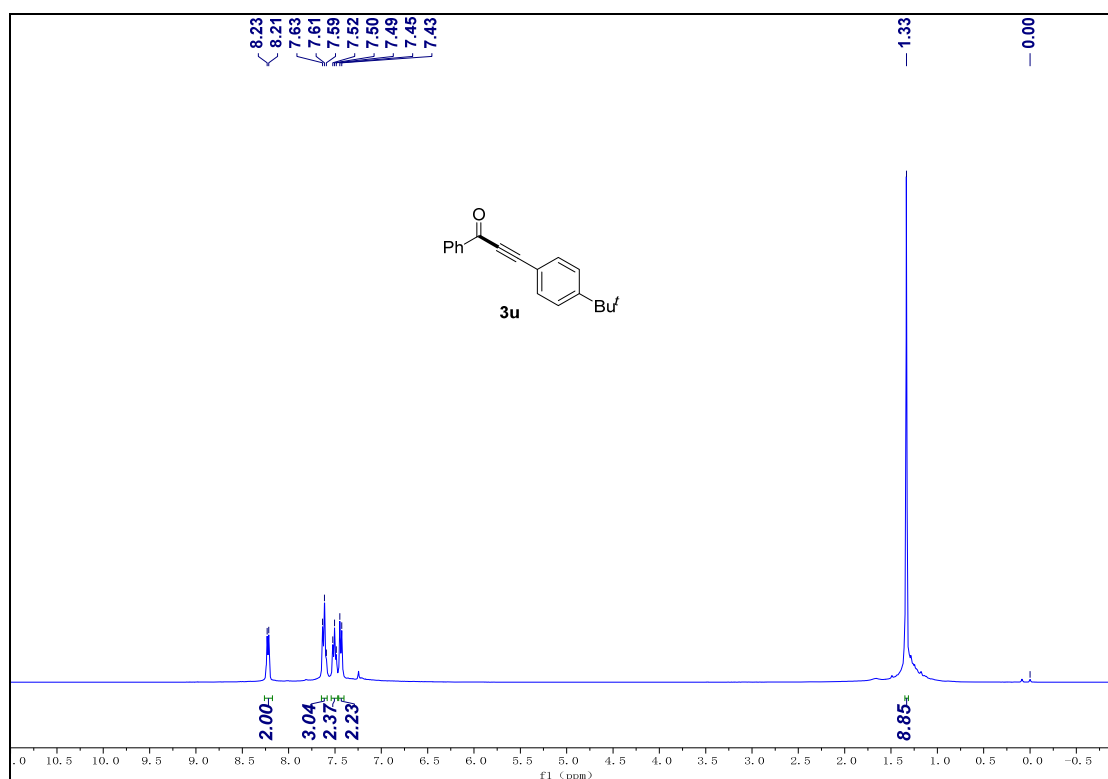

Figure S47. <sup>1</sup>H NMR spectrum of **3u** (400 MHz, CDCl<sub>3</sub>, 298 K).

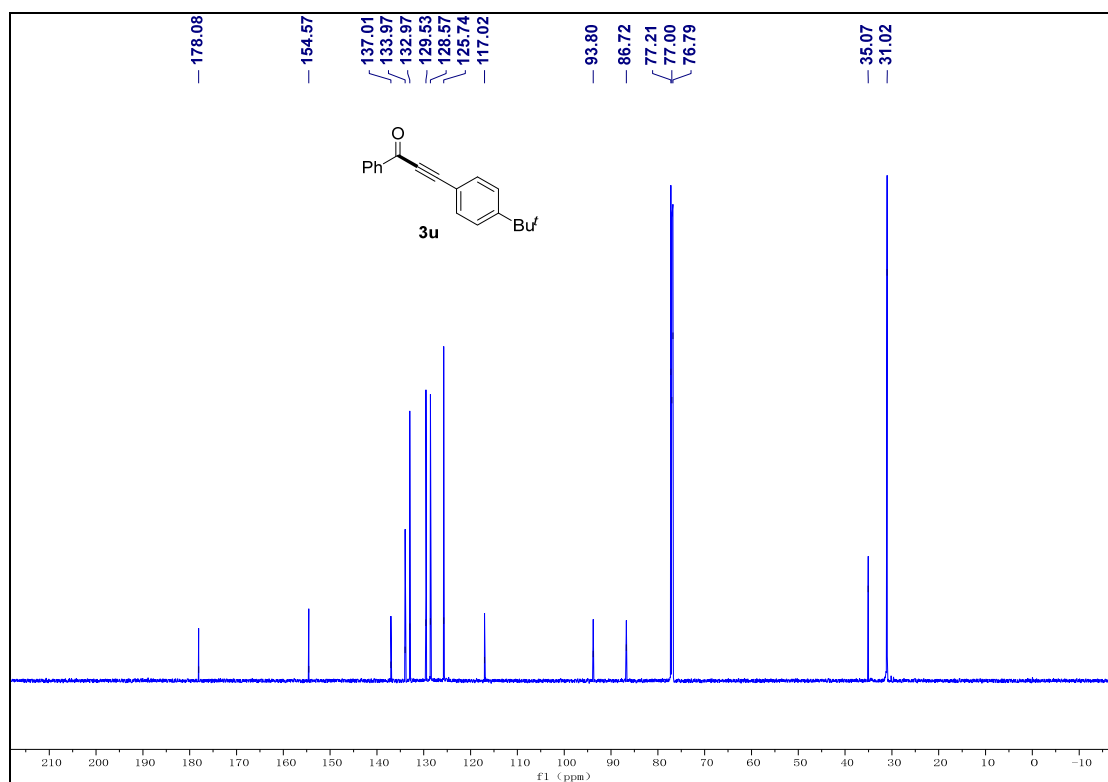

**Figure S48.** <sup>13</sup>C NMR spectrum of **3u** (150 MHz, CDCl<sub>3</sub>, 298 K).

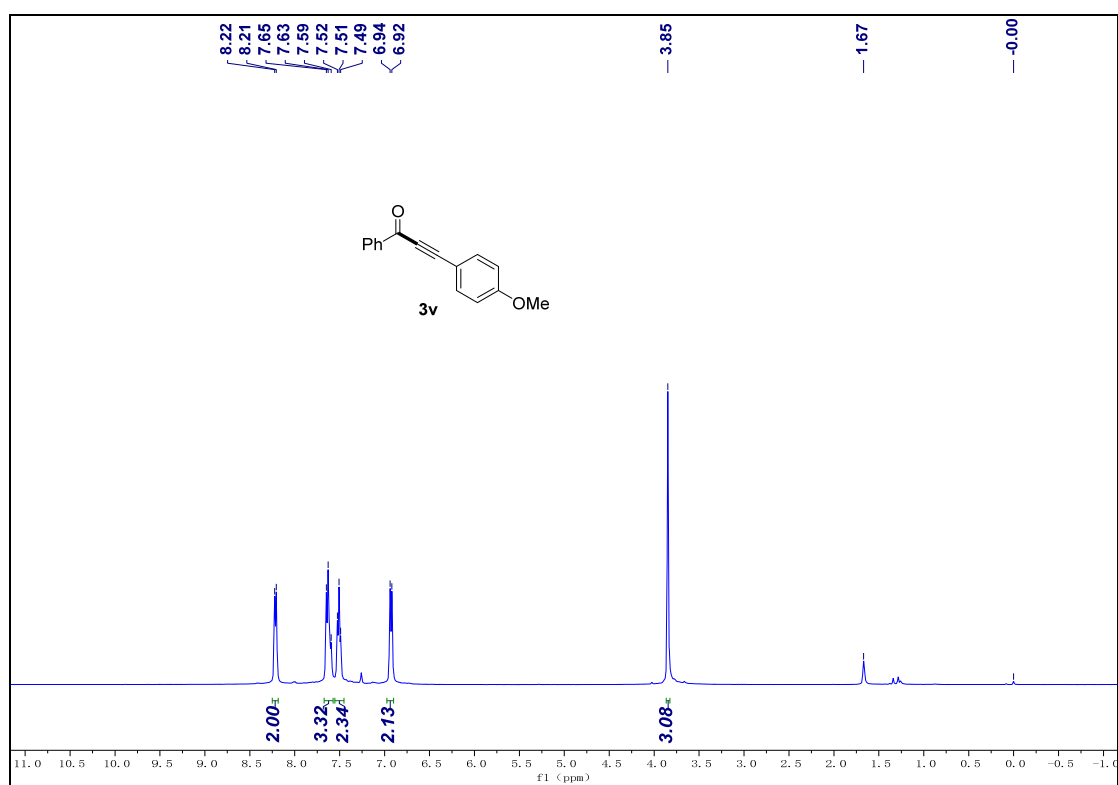

**Figure S49.** <sup>1</sup>H NMR spectrum of **3v** (400 MHz, CDCl<sub>3</sub>, 298 K).

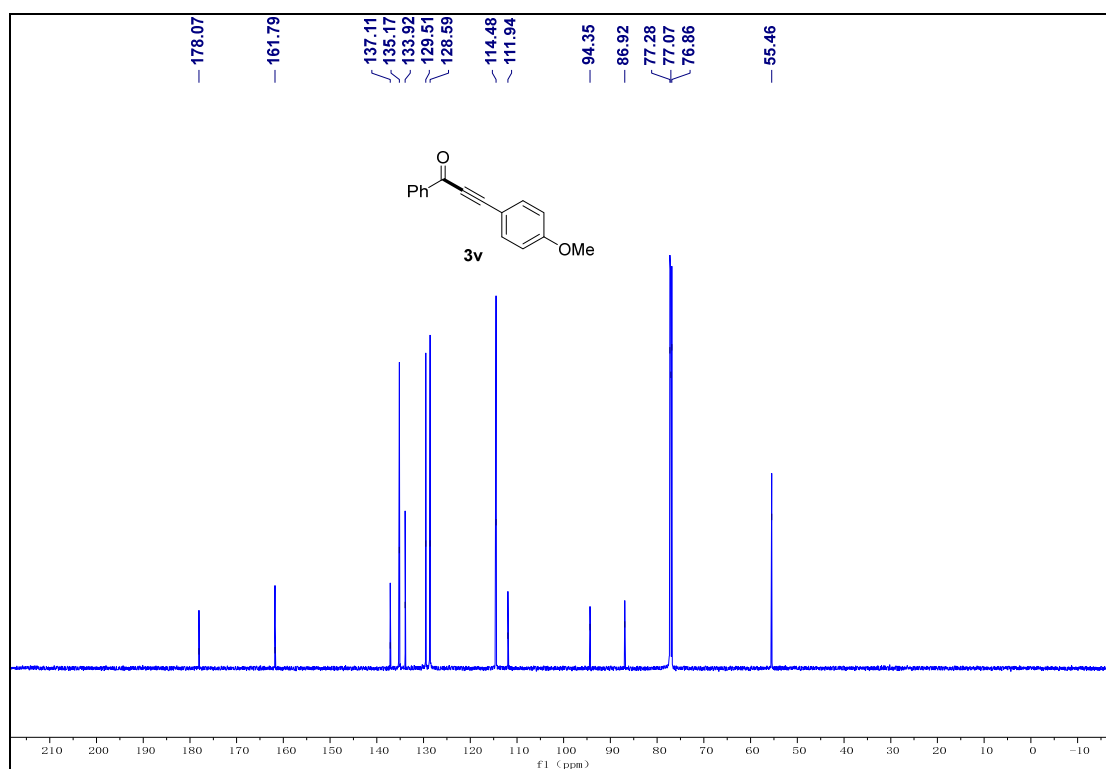

**Figure S50.** <sup>13</sup>C NMR spectrum of **3v** (150 MHz, CDCl<sub>3</sub>, 298 K).

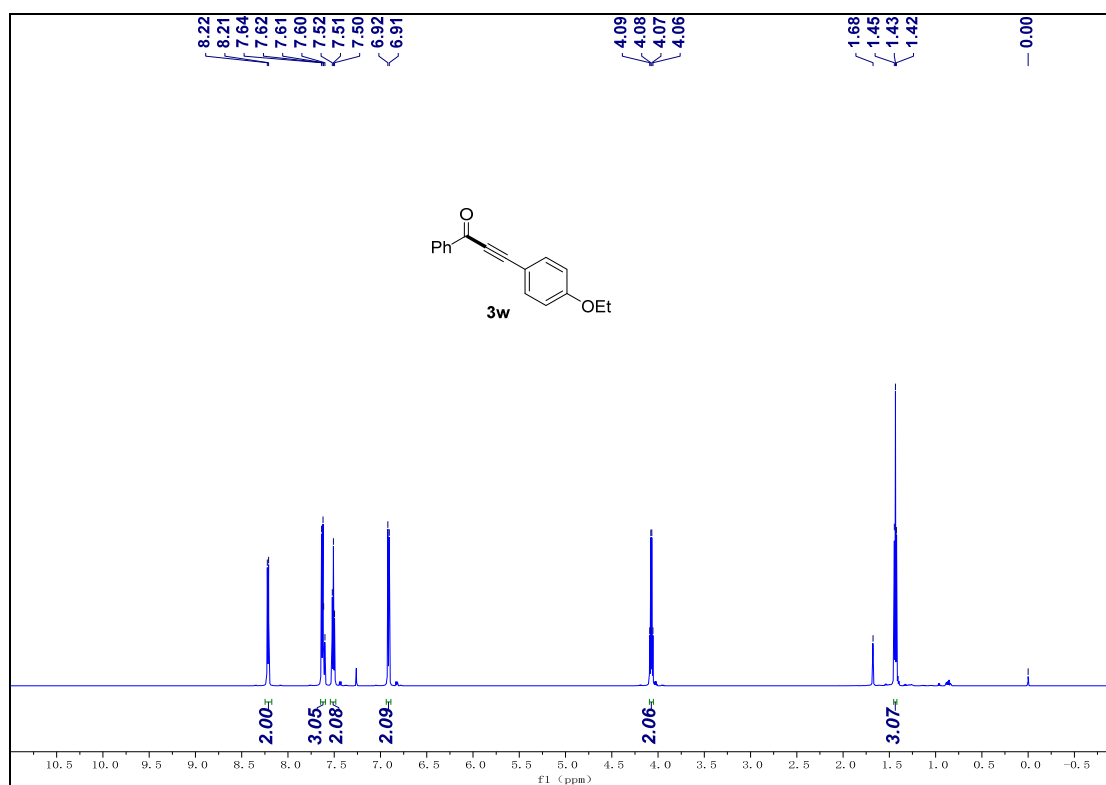

**Figure S51.** <sup>1</sup>H NMR spectrum of **3w** (600 MHz, CDCl<sub>3</sub>, 298 K).

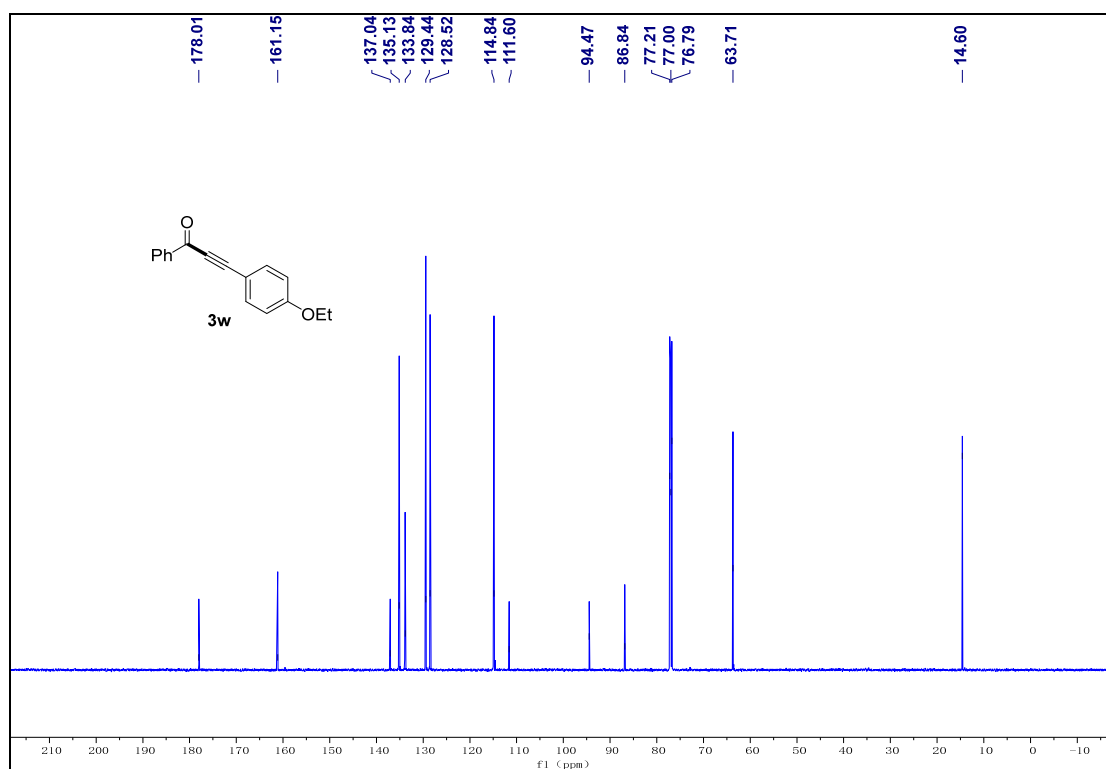

Figure S52. <sup>13</sup>C NMR spectrum of **3w** (150 MHz, CDCl<sub>3</sub>, 298 K).

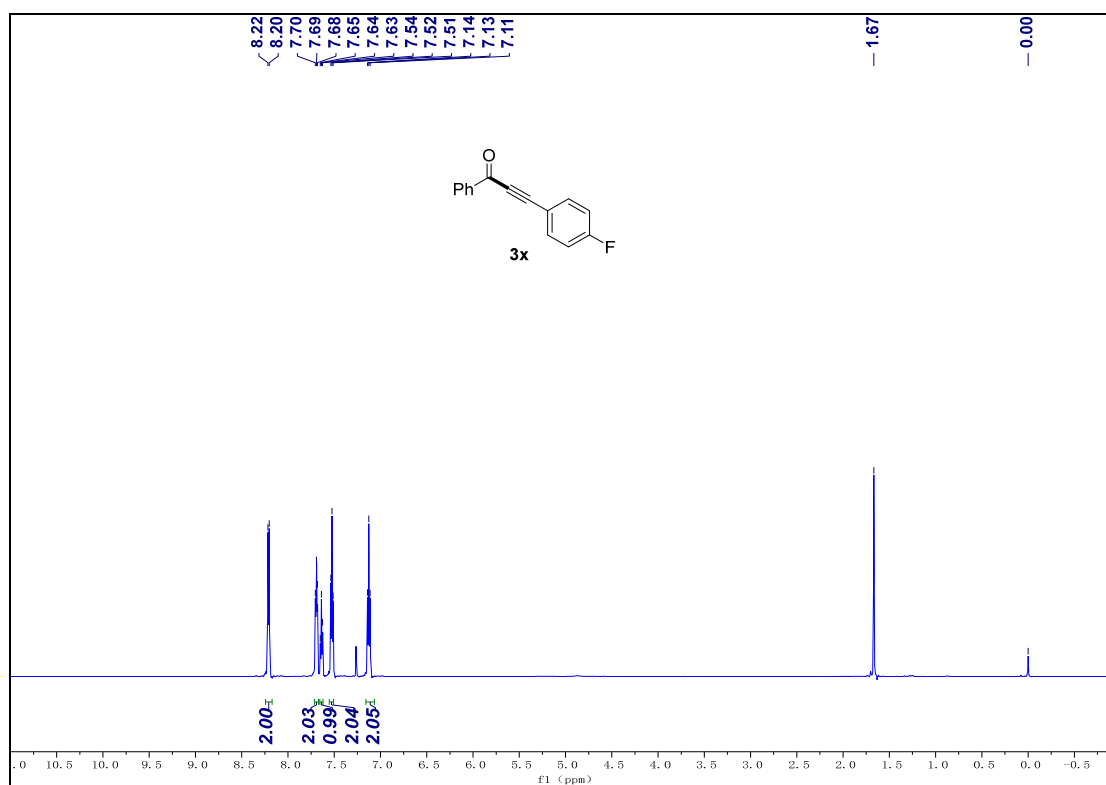

Figure S53. <sup>1</sup>H NMR spectrum of **3x** (600 MHz, CDCl<sub>3</sub>, 298 K).

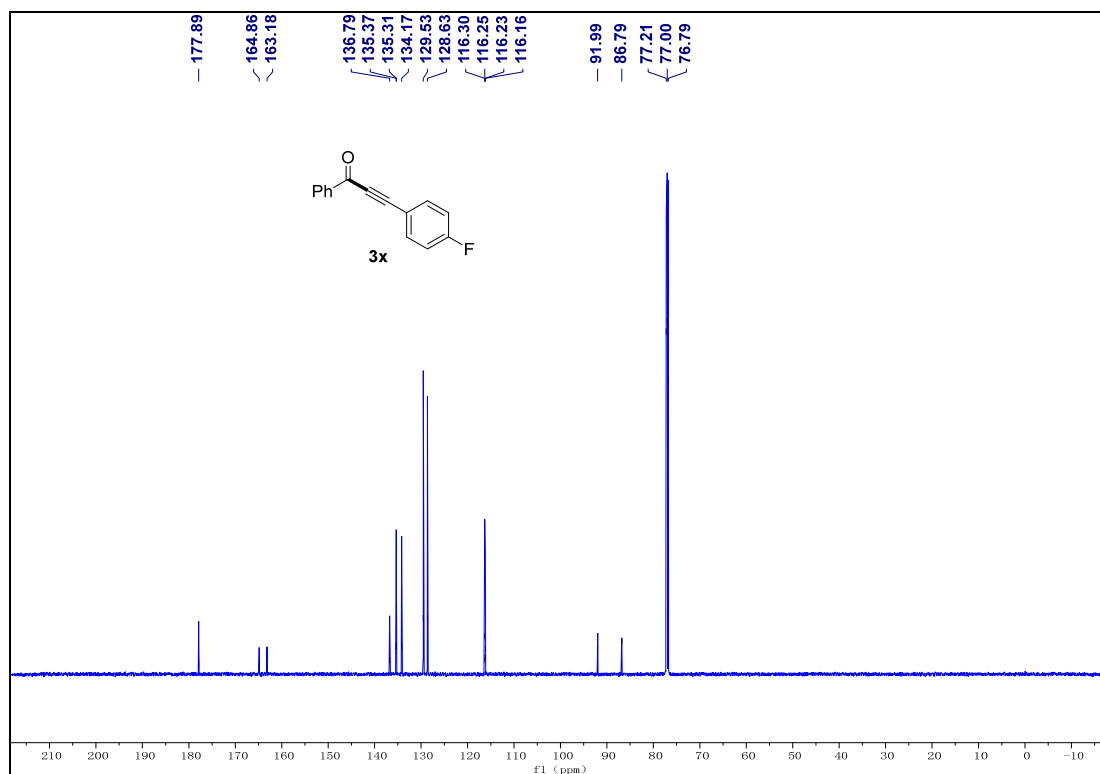

**Figure S54.** <sup>13</sup>C NMR spectrum of **3x** (150 MHz, CDCl<sub>3</sub>, 298 K).

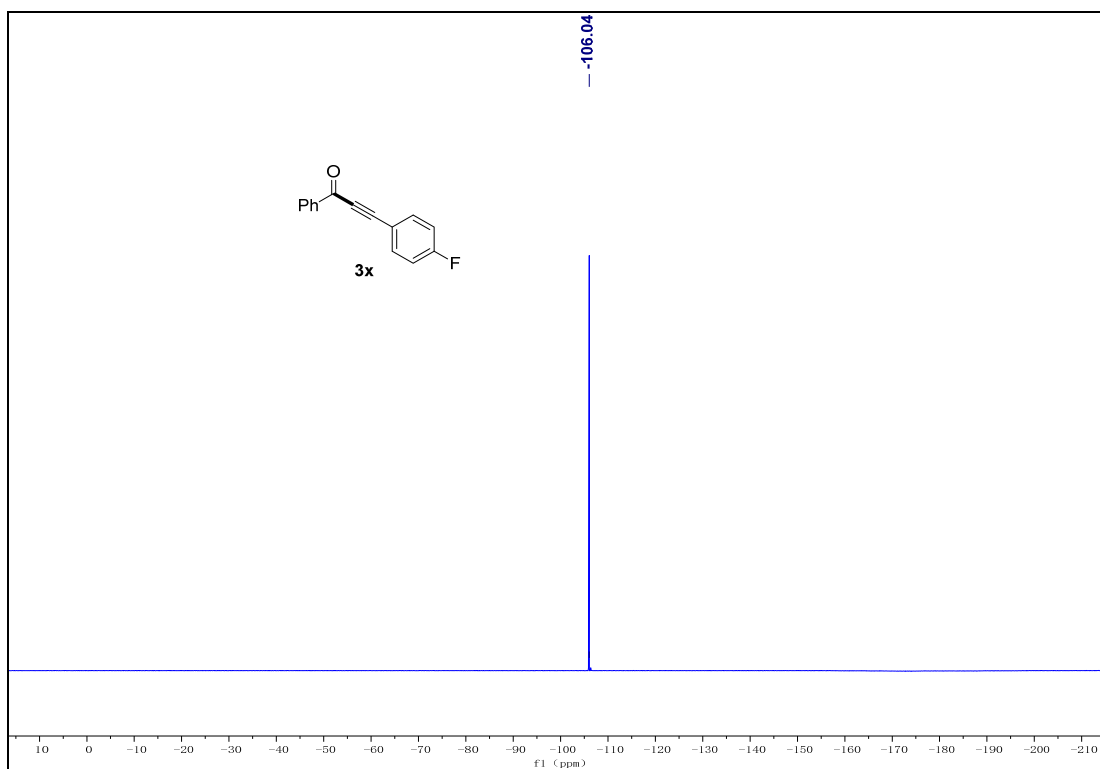

**Figure S55.** <sup>19</sup>F NMR spectrum of **3x** (565 MHz, CDCl<sub>3</sub>, 298 K).

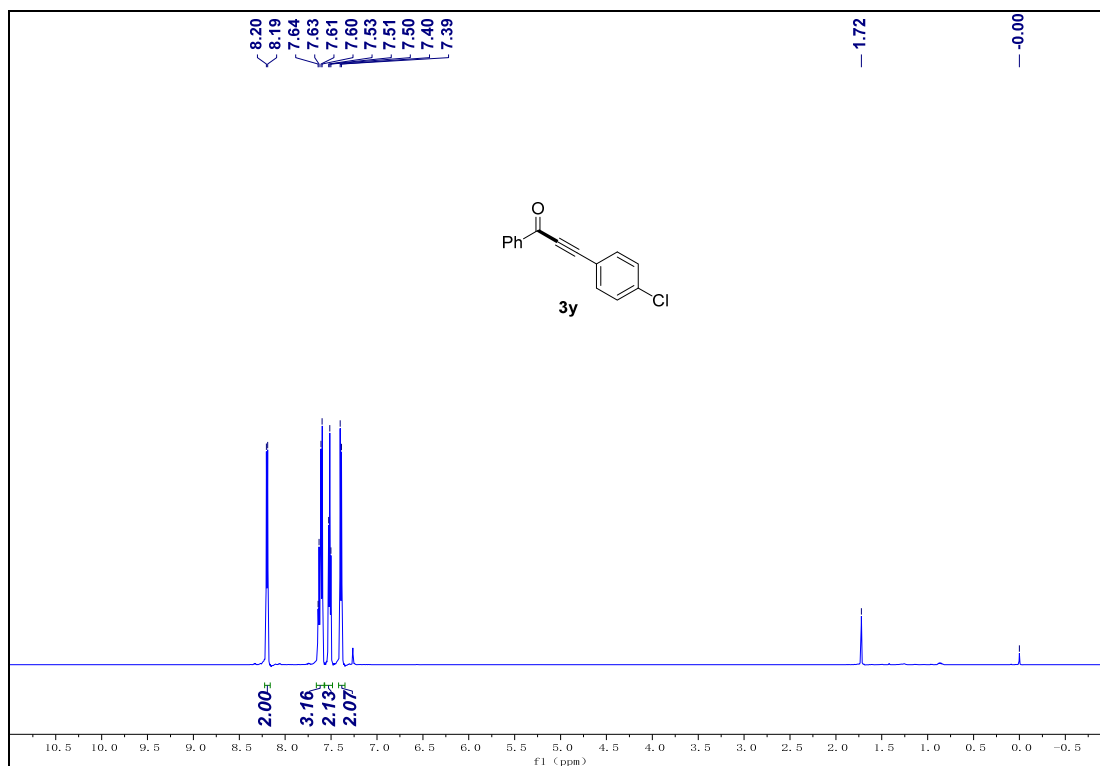

**Figure S56.** <sup>1</sup>H NMR spectrum of **3y** (600 MHz, CDCl<sub>3</sub>, 298 K).

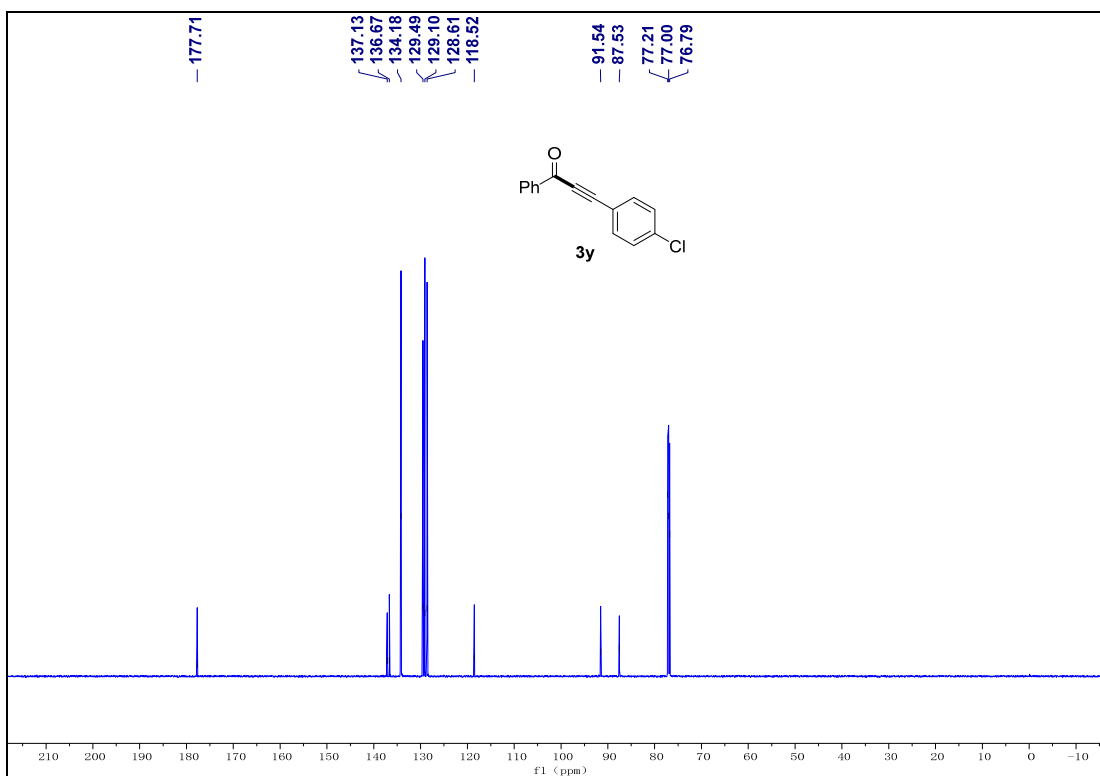

**Figure S57.** <sup>13</sup>C NMR spectrum of **3y** (150 MHz, CDCl<sub>3</sub>, 298 K).



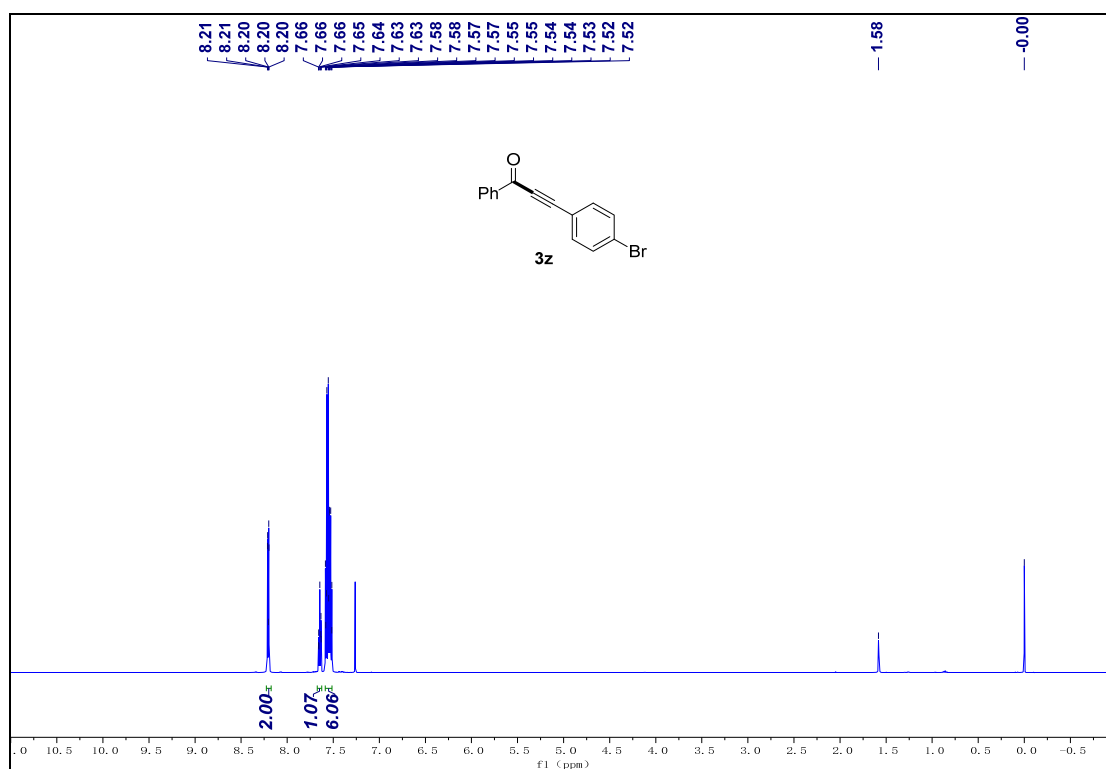

**Figure S58.** <sup>1</sup>H NMR spectrum of **3z** (600 MHz, CDCl<sub>3</sub>, 298 K).

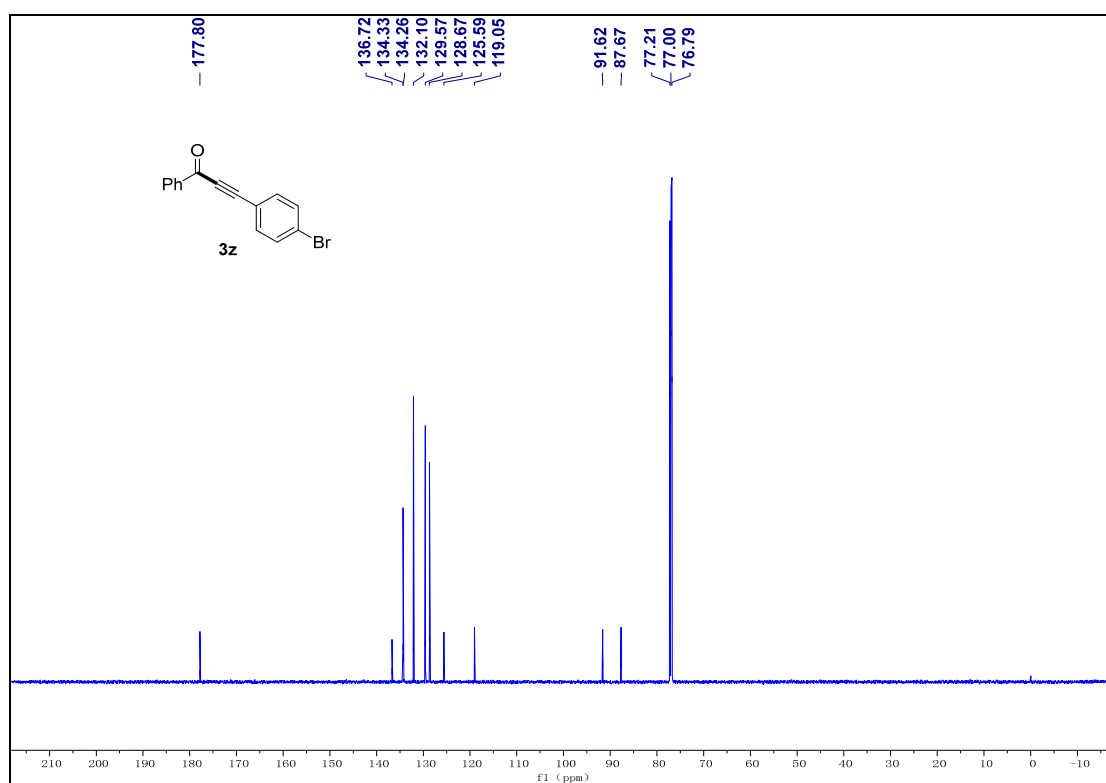

**Figure S59.** <sup>13</sup>C NMR spectrum of **3z** (150 MHz, CDCl<sub>3</sub>, 298 K).

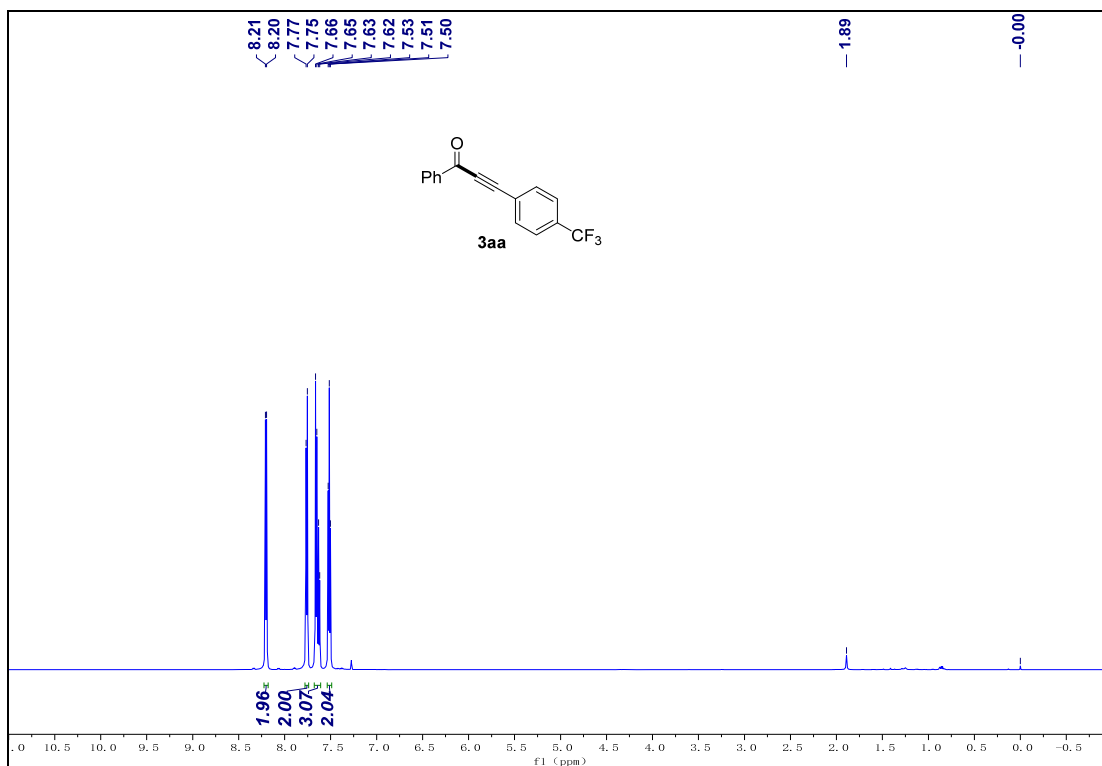

**Figure S60.** <sup>1</sup>H NMR spectrum of **3aa** (600 MHz, CDCl<sub>3</sub>, 298 K).

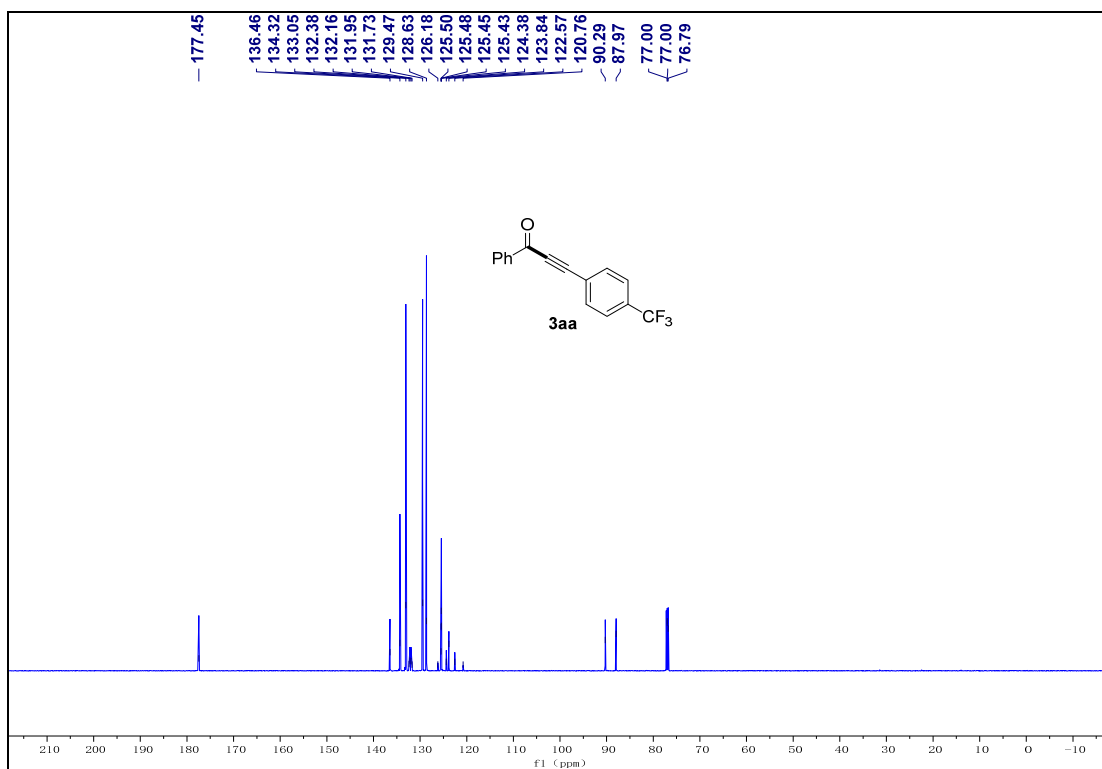

**Figure S61.** <sup>13</sup>C NMR spectrum of **3aa** (150 MHz, CDCl<sub>3</sub>, 298 K).

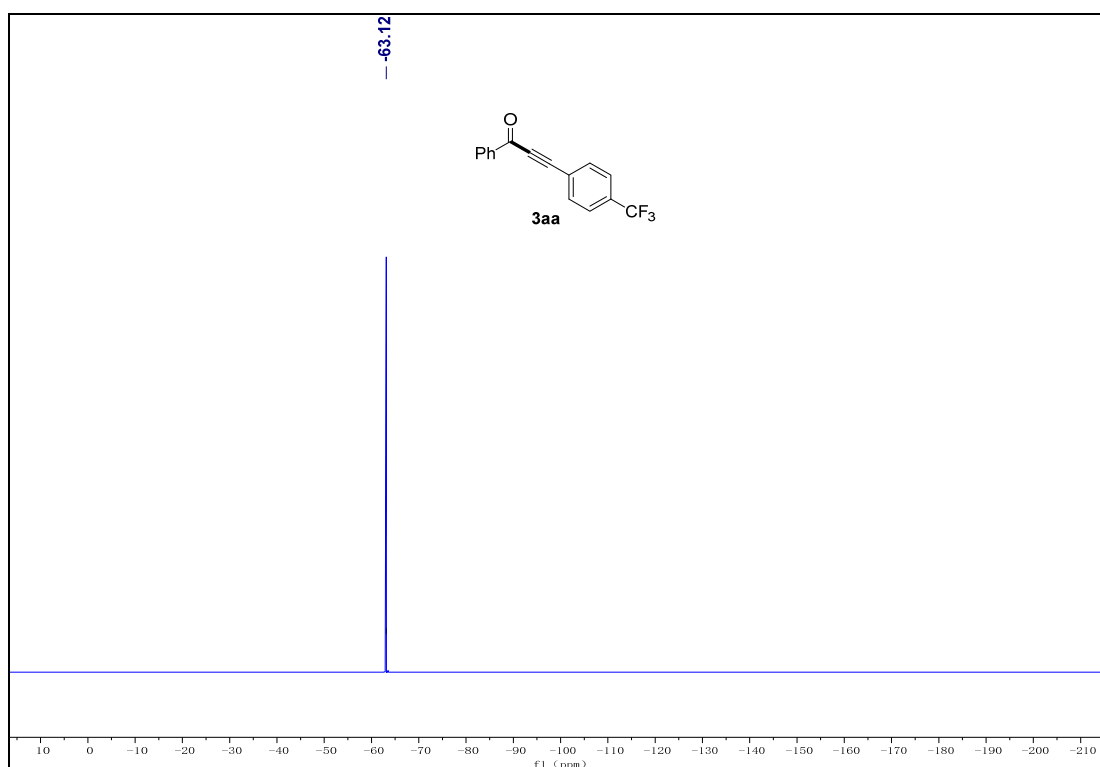

**Figure S62.** <sup>19</sup>F NMR spectrum of **3aa** (565 MHz, CDCl<sub>3</sub>, 298 K).

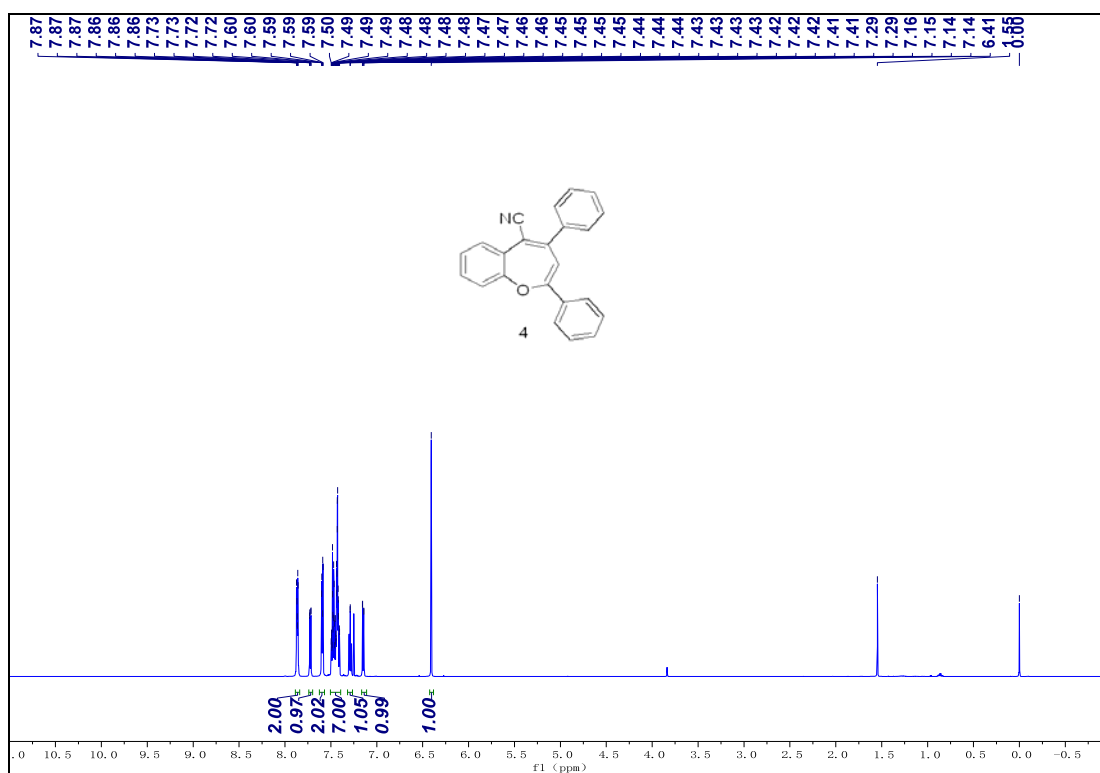

**Figure S63.** <sup>1</sup>H NMR spectrum of **4** (600 MHz, CDCl<sub>3</sub>, 298 K).

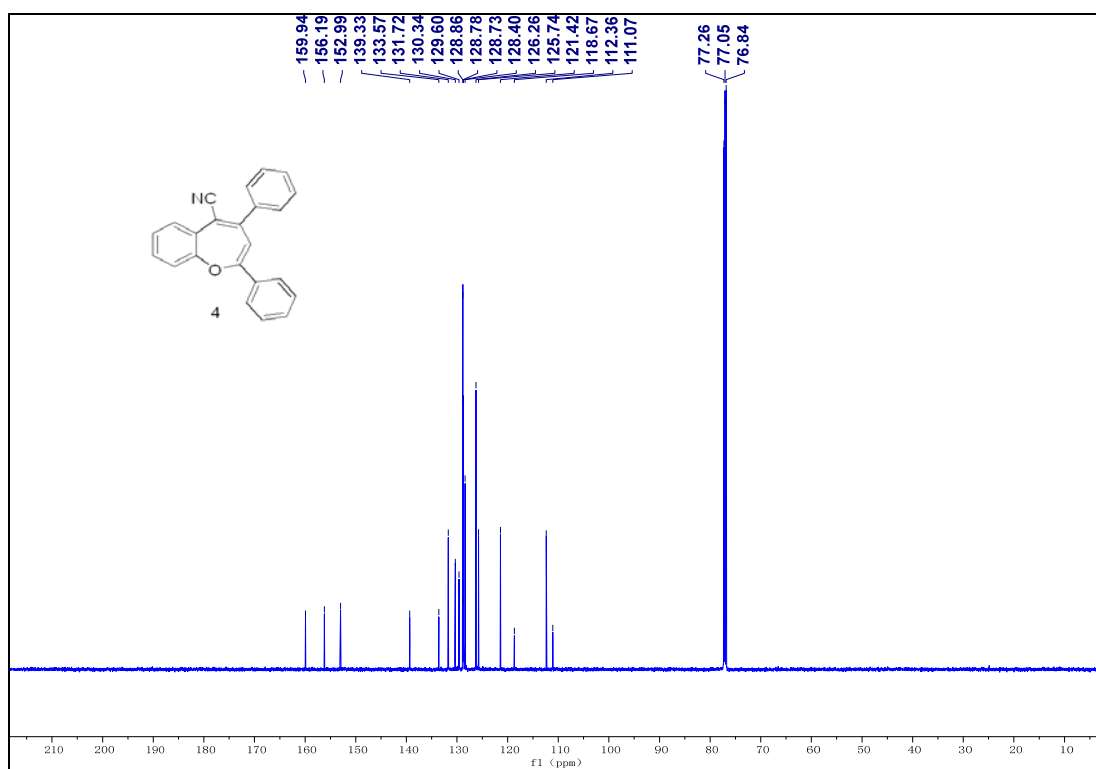

**Figure S64.** <sup>13</sup>C NMR spectrum of **4** (150 MHz, CDCl<sub>3</sub>, 298 K).

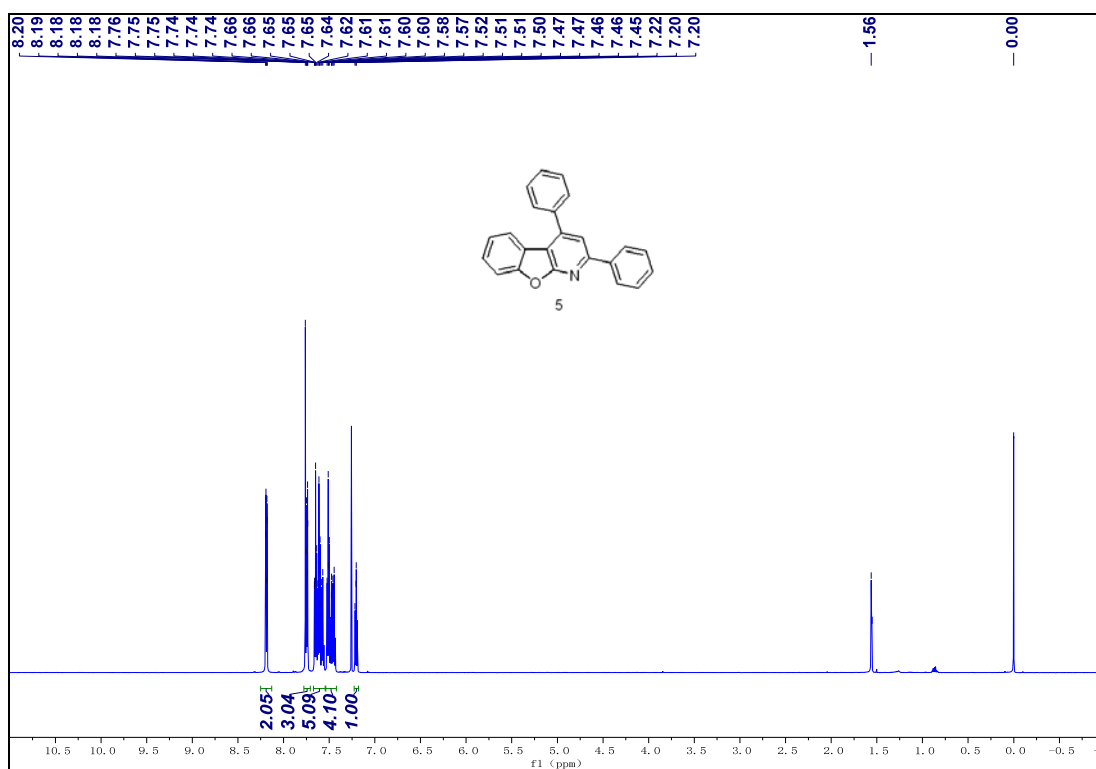

**Figure S65.** <sup>1</sup>H NMR spectrum of **5** (600 MHz, CDCl<sub>3</sub>, 298 K).

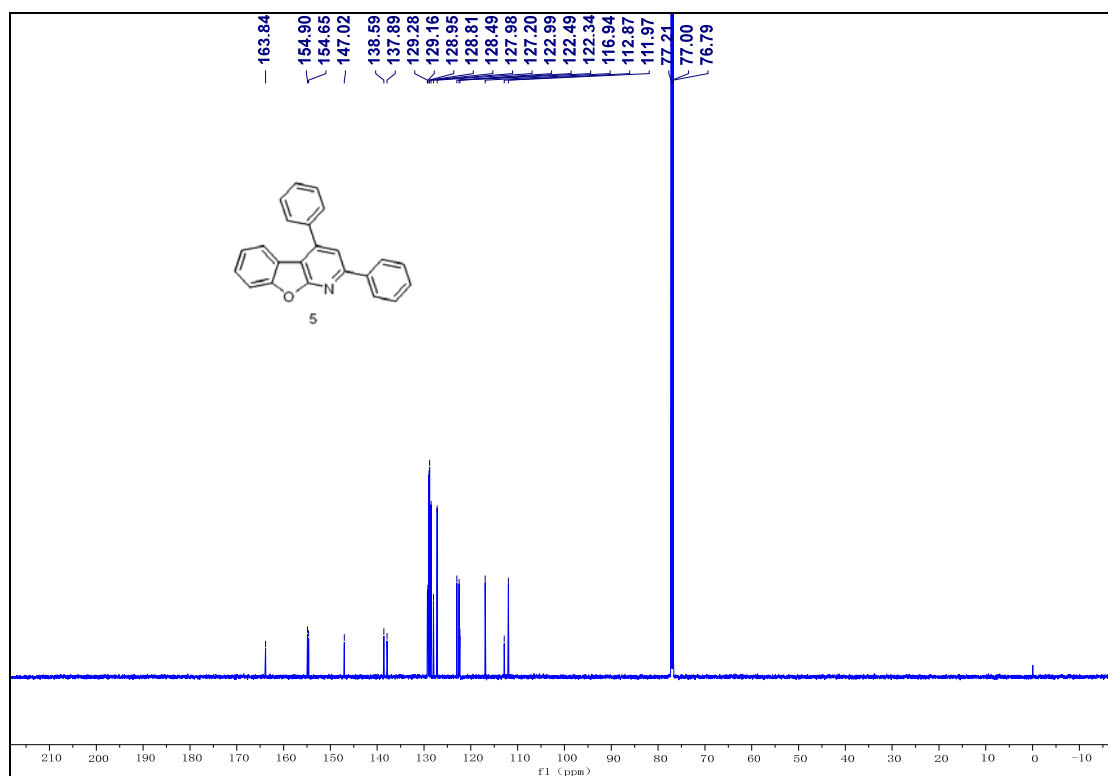

**Figure S66.** <sup>13</sup>C NMR spectrum of **5** (150 MHz, CDCl<sub>3</sub>, 298 K).

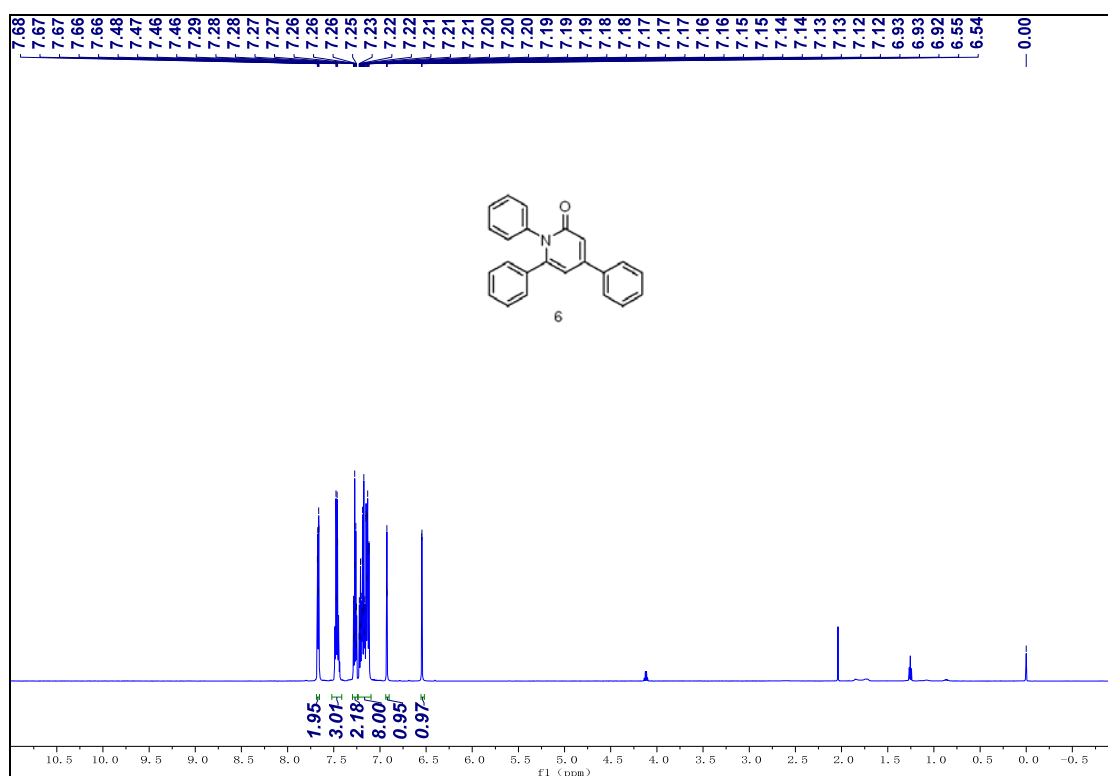

**Figure S67.** <sup>1</sup>H NMR spectrum of **6** (600 MHz, CDCl<sub>3</sub>, 298 K).

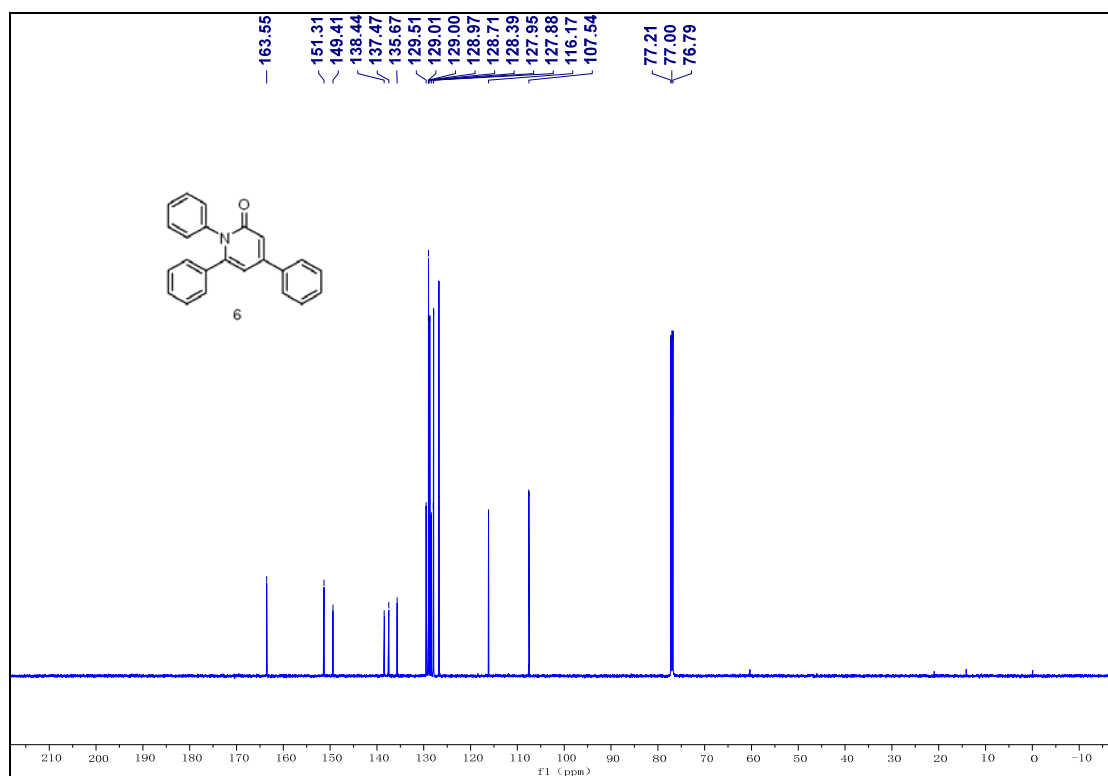

**Figure S68.** <sup>13</sup>C NMR spectrum of **6** (150 MHz, CDCl<sub>3</sub>, 298 K).

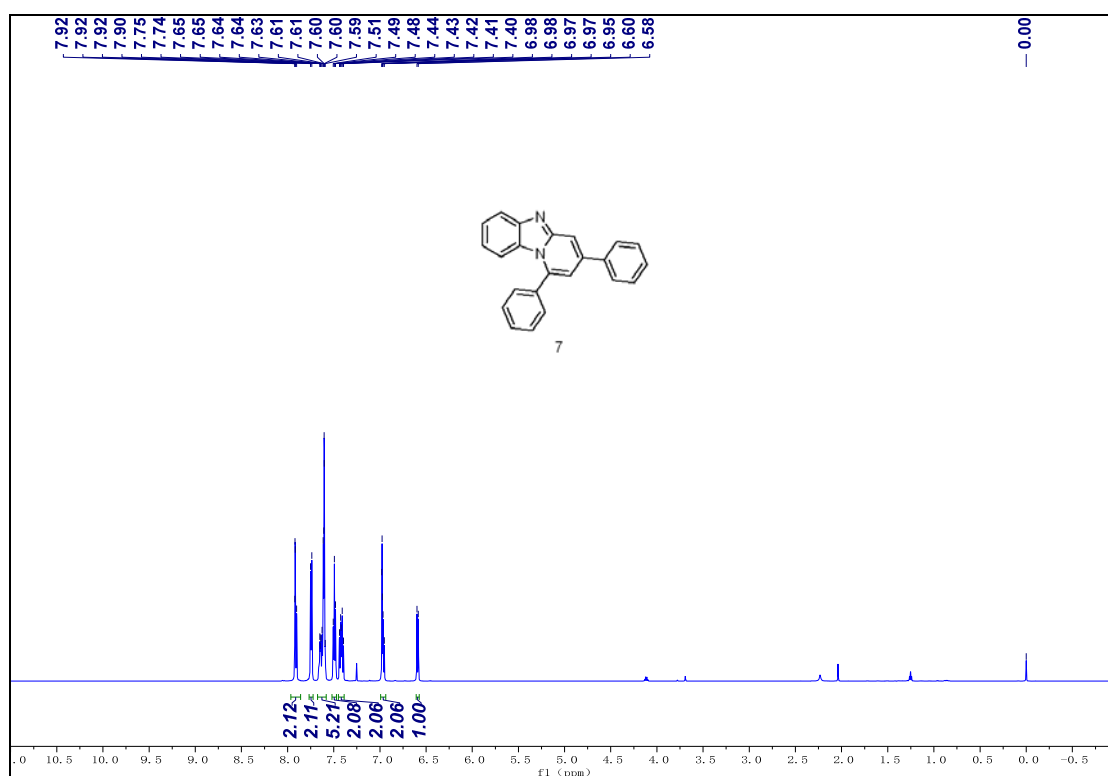

**Figure S69.** <sup>1</sup>H NMR spectrum of **7** (600 MHz, CDCl<sub>3</sub>, 298 K).

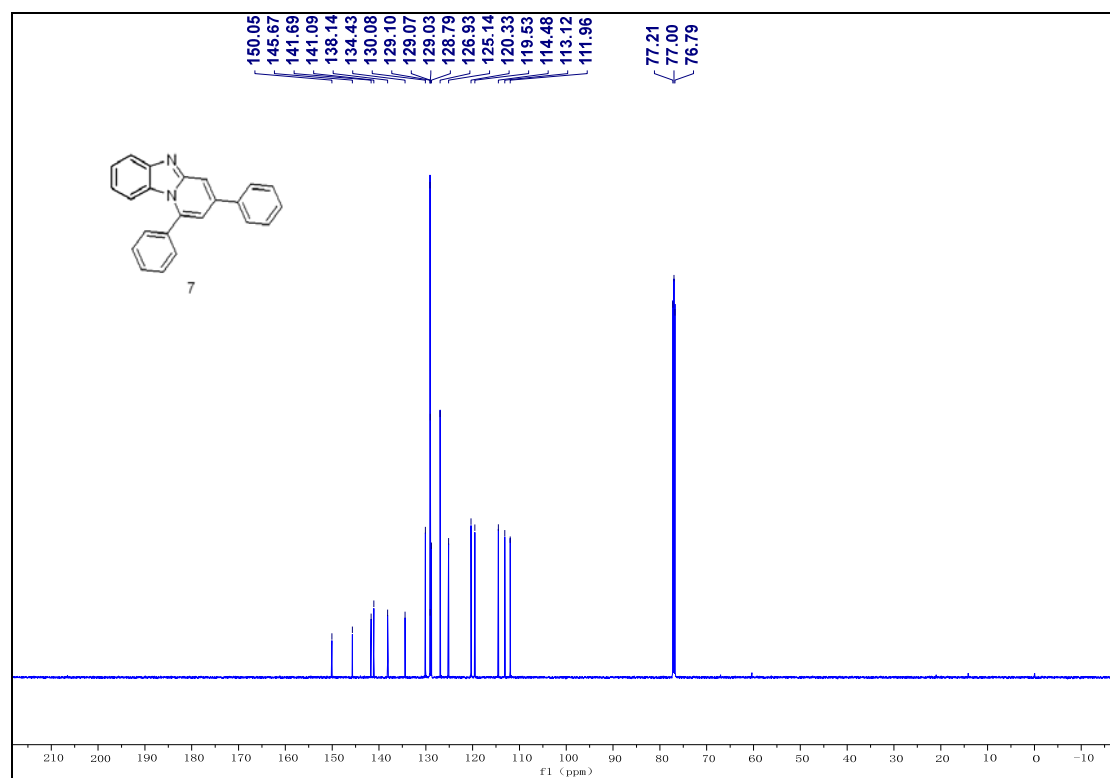

**Figure S70.**  $^{13}\text{C}$  NMR spectrum of **7** (150 MHz,  $\text{CDCl}_3$ , 298 K).

## 9. Reference.

- [1] J. Meesin, P. Katrun, C. Pareseecharoen, M. Pohmakotr, V. Reutrakul, D. Soorukram and C. Kuhakarn, Iodine-catalyzed sulfonylation of arylacetylenic acids and arylacetylenes with sodium sulfonates: synthesis of arylacetylenic sulfones, *J. Org. Chem.*, 2016, **81**, 2744-2752.
- [2] L.-L. Chen, J.-W. Zhang, P. Chen, S. Zhang, W.-W. Yang, J.-Y. Fu, J.-Y. Zhu and Y.-B. Wan, Base-controlled divergent synthesis of 5-cyanobenzoxepines and benzofuro[2,3-b]pyridines from 2-bromophenylacetonitriles and ynones, *Org. Lett.*, 2019, **21**, 5457–5461.
- [3] Q.-H. Teng, X.-J. Peng, Z.-Y. Mo, Y.-L. Xu, H.-T. Tang, H.-S. Wang, H.-B. Sun and Y.-M. Pan, Transition-metal-Free C-N and C-C formation: synthesis of benzo[4,5]imidazo[1,2-a]pyridines and 2-pyridones from ynones, *Green Chem.*, 2018, **20**, 2007-2012.
- [4] S. Tang, L. Zeng, Y. C. Liu and A. and W. Lei, Zinc-catalyzed dehydrogenative cross-coupling of terminal alkynes with aldehydes: access to Ynones, *Angew. Chem., Int. Ed.*, 2015, **54**, 15850-15853.
- [5] C.-Y. Zhang, J.-H. Liu and C.-G. Xia, Aryl-palladium-NHC complex: efficient phosphine-free catalyst precursors for the carbonylation of aryl iodides with amines or alkynes, *Org. Biomol. Chem.*, 2014, **12**, 9702-9706.
- [6] W.-C. Yang, L.-Y. Shen, J.-N. Li, J.-G. Feng and P.-H. Li, Oxidative cyclization of aryl ynones with NaNO<sub>2</sub> for the divergent synthesis of NO<sub>2</sub>-Containing spiro[5.5]trienones, indenones and thioflavones, *Adv. Synth. Catal.*, 2022, **364**, 3651–3656.
- [7] C. Taylor and Y. BolshanMetal, Free synthesis of ynones from acyl chlorides and potassium alkynyltrifluoroborate salts, *Org. Lett.*, 2014, **16**, 2, 488–491.
- [8] D. A. Alonso, C. Nájera and M. C. Pacheco, Synthesis of ynones by palladium-catalyzed acylation of terminal alkynes with acid chlorides, *J. Org. Chem.*, 2004, **69**, 1615-1619.
- [9] W.-X. Zheng, N.-D. Liang, Y. Fu, J. Zhong, Y. Zhang, L. Wang, Y.-H. Wang and Q.-W. Wang, Efficient synthesis of ynones from carboxylic acids and terminal alkynes via Pd/Cu catalysis using 2-chloroimidazolium chloride, *New J. Chem.*, 2023, **47**, 14374-14379.
- [10] C. Bai, S. Jian, X. Yao and Y. Li, Carbonylative sonogashira coupling of terminal alkynes with aryl iodides under atmospheric pressure of CO using Pd(ii)@MOF as the catalyst, *Catal. Sci. Technol.*, 2014, **4**, 3261-3267.
- [11] T. Tang, X.-D. Fei, Z.-Y. Ge, Z. Chen, Y.-M. Zhu and S.-J. Ji, Palladium-catalyzed carbonylative sonogashira coupling of aryl bromides via tert-butyl isocyanide insertion, *J. Org. Chem.*, 2013, **78**, 3170-3175.
- [12] Y. Wu, L. Zeng, H. Li, Y. Cao, J.-C. Hu, M.-H. Xu, R.-Y. Shi, H. Yi and A.-W. Lei, Electrochemical palladium-catalyzed oxidative sonogashira carbonylation of arylhydrazines and alkynes to ynones, *J. Am. Chem. Soc.*, 2021, **143**, 12460–12466.
- [13] C.-T. He, X.-Li. Han, Y.-X. Zhang, Z.-T. Du, C.-M. Si and G.-W. Bang, Sc(OTf)<sub>3</sub>-catalyzed [3+2]-cycloaddition of nitrones with ynones, *Org. Biomol. Chem.*, 2021, **19**, 457-466.
- [14] Tasch, B. O. A.; Merkul, E.; Frank, W.; Müller, T. J. J. New three-component glyoxylation-decarbonylative Stille coupling sequence to acyl heterocycles under mild conditions. *Synthesis* 2010, **13**, 2139-2146.
